# Supplementary material for: Evolution of Hominin Detoxification: Neanderthal and Modern Human Ah Receptor Respond Similarly to TCDD
Source: Oxford University Press journal article supplement (doi:10.1093/molbev/msaa287), 2020-11-04

## Supplementary Information SI7

### Isolation and Mutation of the 5'-UTR Sequence from *AHR* cDNA Clone SC119159.

Alignment of the deduced sequence of template clone SC119159 purchased from Origene (Rockville MD 20850, USA), the modern human *AHR* mRNA reference sequence, primers, overlapping intermediate PCR fragments, final mutated PCR product, and insert for pcDNA3-EGFP generated to create the Neanderthal 185G variant (bottom track) of the *AHR* 5'-untranslated region (UTR) by overlap extension PCR (Heckman and Pease 2007). The wild-type (185A) and mutated (185G) 5'-UTR sequences were subsequently inserted into EGFP fusion protein expression vector pcDNA3-EGFP (see main text for details). The ruler above the alignment shows the position in the Origene construct carrying *AHR* cDNA clone SC119159 in vector pCMV6-XL4; numbers at the right of each alignment block refer to the position within the sequence shown on that specific line. Nucleotide positions deviating from the deduced sequence of SC119159 in pCMV6-XL4 are highlighted in red. Primer sequences and annealing temperatures are listed in Supplementary Information SI8.

|                                   |                                                                                                                                                                                                                                                              |
|-----------------------------------|--------------------------------------------------------------------------------------------------------------------------------------------------------------------------------------------------------------------------------------------------------------|
| pCMV6-XL4_SC119159_Deduced:       | Relevant portion of the nucleotide sequence of <i>AHR</i> cDNA clone SC119159 in pCMV6-XL4 as deduced from the sequence information provided by Origene in combination with newly generated sequence information.                                            |
| AHR_201_Hum_ENST00000242057.8:    | Modern human <i>AHR</i> mRNA reference sequence retrieved from the Ensembl database.                                                                                                                                                                         |
| Primer_Up_pCMV6-XL4_918-937:      | Upper primer for generation of the upstream overlap PCR fragment.                                                                                                                                                                                            |
| Upper_overlap_SC119159_918-1169:  | Upstream overlap PCR fragment.                                                                                                                                                                                                                               |
| Primer_AHR_ENST200-170_185G_rev:  | Reverse mutagenesis primer to incorporate the G variant at position 185 of the <i>AHR</i> 5'-UTR sequence (position numbering of AHR_201_Hum_ENST00000242057.8). Note that the reverse complement of this primer as listed in SI8 is shown in the alignment. |
| Primer_AHR_ENST173-203_185G_fwd:  | Forward mutagenesis primer to incorporate the G variant at position 185 of the <i>AHR</i> 5'-UTR sequence (position numbering of AHR_201_Hum_ENST00000242057.8).                                                                                             |
| Lower_overlap_SC119159_1142-1612: | Downstream overlap PCR fragment.                                                                                                                                                                                                                             |
| Primer_Down_AHR_ENST643-630_XhoI: | Lower primer for generation of the downstream overlap PCR fragment. Note that the reverse complement of this primer as listed in SI8 is shown in the alignment.                                                                                              |
| pCMV6-XL4_SC119159_918-1612_XhoI: | Complete SC119159 segment (185A) amplified and mutated into 185G by overlap extension PCR.                                                                                                                                                                   |
| EcoRI-XhoI_SC119159_979-1612:     | EcoRI – XhoI restriction subfragment inserted into EGFP fusion protein expression vector pcDNA3-EGFP (mutated 185G variant).                                                                                                                                 |
| 5'-UTR_SC119159_993-1612:         | Complete <i>AHR</i> 5'-UTR sequence included in the inserted EcoRI – XhoI restriction fragment (mutated 185G variant).                                                                                                                                       |

Reference: Heckman KL, Pease LR. 2007. Gene splicing and mutagenesis by PCR-driven overlap extension. *Nat Protoc* 2(4):924-932.

pCMV6-XL4\_SC119159\_Deduced  
 AHR\_201\_Hum\_ENST00000242057.8  
 Primer\_Up\_pCMV6-XL4\_918-937  
 Upper\_overlap\_SC119159\_918-1169  
 Primer\_AHR\_ENST200-170\_185G\_rev  
 Primer\_AHR\_ENST173-203\_185G\_fwd  
 Lower\_overlap\_SC119159\_1142-1612  
 Primer\_Down\_AHR\_ENST643-630\_XhoI  
 pCMV6-XL4\_SC119159\_918-1612\_XhoI  
 EcoRI-XhoI\_SC119159\_979-1612  
 5'-UTR\_SC119159\_993-1612

pCMV6-XL4\_SC119159\_Deduced  
 AHR\_201\_Hum\_ENST00000242057.8  
 Primer\_Up\_pCMV6-XL4\_918-937  
 Upper\_overlap\_SC119159\_918-1169  
 Primer\_AHR\_ENST200-170\_185G\_rev  
 Primer\_AHR\_ENST173-203\_185G\_fwd  
 Lower\_overlap\_SC119159\_1142-1612  
 Primer\_Down\_AHR\_ENST643-630\_XhoI  
 pCMV6-XL4\_SC119159\_918-1612\_XhoI  
 EcoRI-XhoI\_SC119159\_979-1612  
 5'-UTR\_SC119159\_993-1612

pCMV6-XL4\_SC119159\_Deduced  
 AHR\_201\_Hum\_ENST00000242057.8  
 Primer\_Up\_pCMV6-XL4\_918-937  
 Upper\_overlap\_SC119159\_918-1169  
 Primer\_AHR\_ENST200-170\_185G\_rev  
 Primer\_AHR\_ENST173-203\_185G\_fwd  
 Lower\_overlap\_SC119159\_1142-1612  
 Primer\_Down\_AHR\_ENST643-630\_XhoI  
 pCMV6-XL4\_SC119159\_918-1612\_XhoI  
 EcoRI-XhoI\_SC119159\_979-1612  
 5'-UTR\_SC119159\_993-1612

pCMV6-XL4\_SC119159\_Deduced  
 AHR\_201\_Hum\_ENST00000242057.8  
 Primer\_Up\_pCMV6-XL4\_918-937  
 Upper\_overlap\_SC119159\_918-1169  
 Primer\_AHR\_ENST200-170\_185G\_rev  
 Primer\_AHR\_ENST173-203\_185G\_fwd  
 Lower\_overlap\_SC119159\_1142-1612  
 Primer\_Down\_AHR\_ENST643-630\_XhoI  
 pCMV6-XL4\_SC119159\_918-1612\_XhoI  
 EcoRI-XhoI\_SC119159\_979-1612  
 5'-UTR\_SC119159\_993-1612

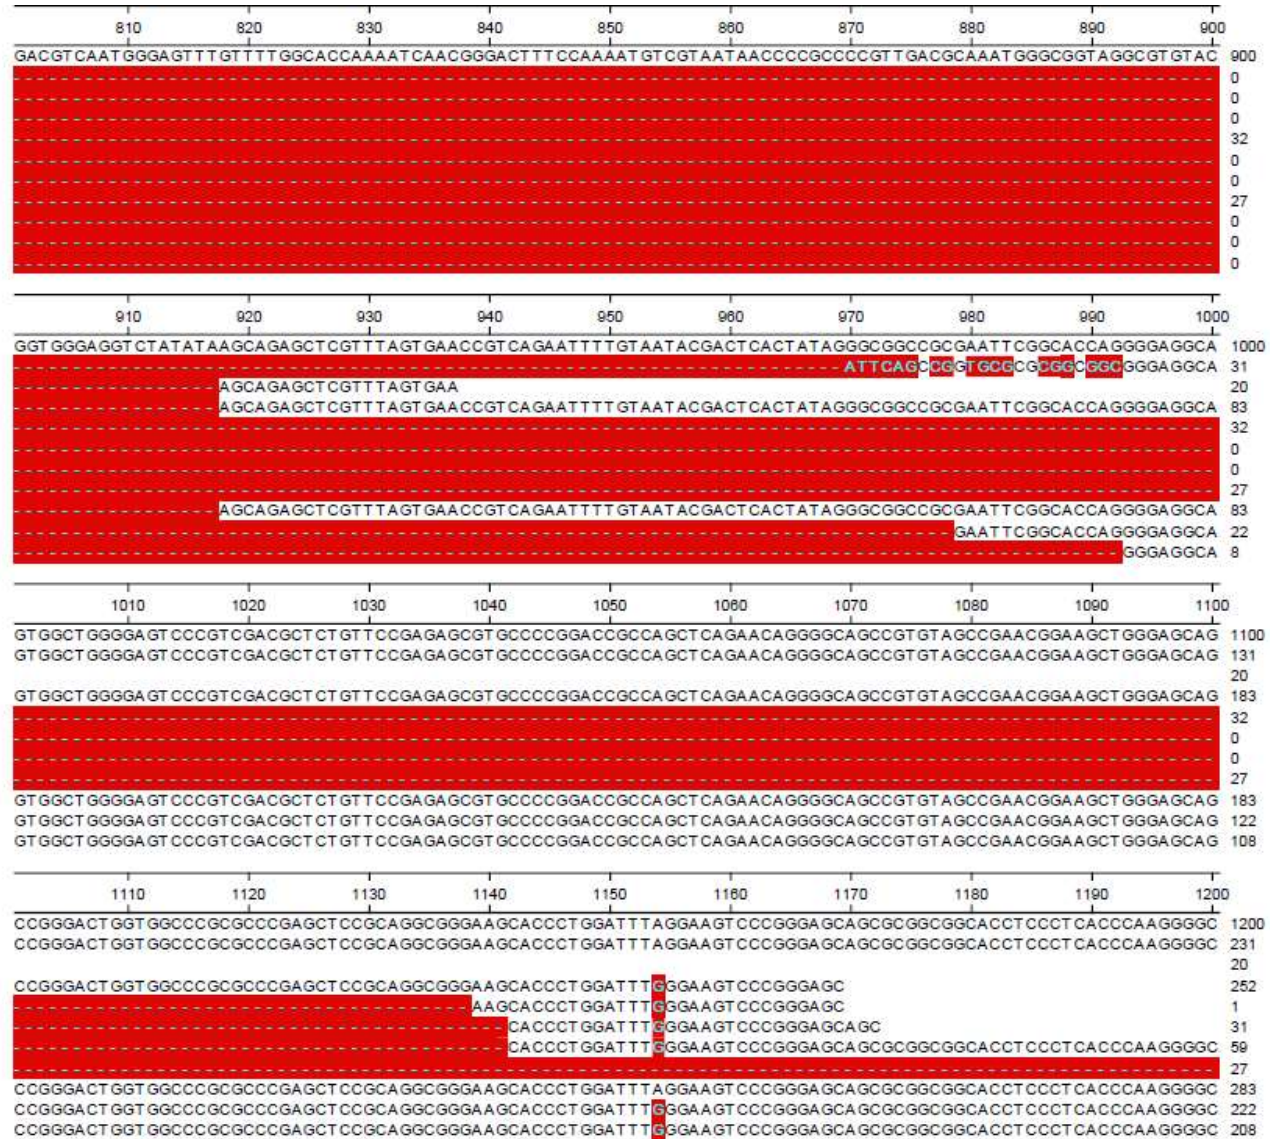

pCMV6-XL4\_SC119159\_Deduced  
AHR\_201\_Hum\_ENST00000242057.8  
Primer\_Up\_pCMV6-XL4\_918-937  
Upper\_overlap\_SC119159\_918-1169  
Primer\_AHR\_ENST200-170\_185G\_rev  
Primer\_AHR\_ENST173-203\_185G\_fwd  
Lower\_overlap\_SC119159\_1142-1612  
Primer\_Down\_AHR\_ENST843-830\_XhoI  
pCMV6-XL4\_SC119159\_918-1612\_XhoI  
EcoRI-XhoI\_SC119159\_979-1612  
5'-UTR\_SC119159\_993-1612

pCMV6-XL4\_SC119159\_Deduced  
AHR\_201\_Hum\_ENST00000242057.8  
Primer\_Up\_pCMV6-XL4\_918-937  
Upper\_overlap\_SC119159\_918-1169  
Primer\_AHR\_ENST200-170\_185G\_rev  
Primer\_AHR\_ENST173-203\_185G\_fwd  
Lower\_overlap\_SC119159\_1142-1612  
Primer\_Down\_AHR\_ENST843-830\_XhoI  
pCMV6-XL4\_SC119159\_918-1612\_XhoI  
EcoRI-XhoI\_SC119159\_979-1612  
5'-UTR\_SC119159\_993-1612

pCMV6-XL4\_SC119159\_Deduced  
AHR\_201\_Hum\_ENST00000242057.8  
Primer\_Up\_pCMV6-XL4\_918-937  
Upper\_overlap\_SC119159\_918-1169  
Primer\_AHR\_ENST200-170\_185G\_rev  
Primer\_AHR\_ENST173-203\_185G\_fwd  
Lower\_overlap\_SC119159\_1142-1612  
Primer\_Down\_AHR\_ENST843-830\_XhoI  
pCMV6-XL4\_SC119159\_918-1612\_XhoI  
EcoRI-XhoI\_SC119159\_979-1612  
5'-UTR\_SC119159\_993-1612

pCMV6-XL4\_SC119159\_Deduced  
AHR\_201\_Hum\_ENST00000242057.8  
Primer\_Up\_pCMV6-XL4\_918-937  
Upper\_overlap\_SC119159\_918-1169  
Primer\_AHR\_ENST200-170\_185G\_rev  
Primer\_AHR\_ENST173-203\_185G\_fwd  
Lower\_overlap\_SC119159\_1142-1612  
Primer\_Down\_AHR\_ENST843-830\_XhoI  
pCMV6-XL4\_SC119159\_918-1612\_XhoI  
EcoRI-XhoI\_SC119159\_979-1612  
5'-UTR\_SC119159\_993-1612

```

      1210      1220      1230      1240      1250      1260      1270      1280      1290      1300
CGCGGCGACGGT CACGGGGCGCGGCGCCACCCTGAGCGACCCAGGCCAGGATTCTAAATAGACGGCCCAAGGCTCCTCCTCGGCCCGGGCCGCCTCACCTG 1300
CGCGGCGACGGT CACGGGGCGCGGCGCCACCCTGAGCGACCCAGGCCAGGATTCTAAATAGACGGCCCAAGGCTCCTCCTCGGCCCGGGCCGCCTCACCTG 331
                                                                20
                                                                252
                                                                1
                                                                31
CGCGGCGACGGT CACGGGGCGCGGCGCCACCCTGAGCGACCCAGGCCAGGATTCTAAATAGACGGCCCAAGGCTCCTCCTCGGCCCGGGCCGCCTCACCTG 159
                                                                27
CGCGGCGACGGT CACGGGGCGCGGCGCCACCCTGAGCGACCCAGGCCAGGATTCTAAATAGACGGCCCAAGGCTCCTCCTCGGCCCGGGCCGCCTCACCTG 383
CGCGGCGACGGT CACGGGGCGCGGCGCCACCCTGAGCGACCCAGGCCAGGATTCTAAATAGACGGCCCAAGGCTCCTCCTCGGCCCGGGCCGCCTCACCTG 322
CGCGGCGACGGT CACGGGGCGCGGCGCCACCCTGAGCGACCCAGGCCAGGATTCTAAATAGACGGCCCAAGGCTCCTCCTCGGCCCGGGCCGCCTCACCTG 308

      1310      1320      1330      1340      1350      1360      1370      1380      1390      1400
CGGGCATTGCCGCGCCGCCTCCGCCGGTGTAGACGGCACTGCGCGCCTTGCTCGCGGGTCTCCGCCCTCGCCCACTCACTGCGCCAGGCCAGGC 1400
CGGGCATTGCCGCGCCGCCTCCGCCGGTGTAGACGGCACTGCGCGCCTTGCTCGCGGGTCTCCGCCCTCGCCCACTCACTGCGCCAGGCCAGGC 431
                                                                20
                                                                252
                                                                1
                                                                31
CGGGCATTGCCGCGCCGCCTCCGCCGGTGTAGACGGCACTGCGCGCCTTGCTCGCGGGTCTCCGCCCTCGCCCACTCACTGCGCCAGGCCAGGC 259
                                                                27
CGGGCATTGCCGCGCCGCCTCCGCCGGTGTAGACGGCACTGCGCGCCTTGCTCGCGGGTCTCCGCCCTCGCCCACTCACTGCGCCAGGCCAGGC 483
CGGGCATTGCCGCGCCGCCTCCGCCGGTGTAGACGGCACTGCGCGCCTTGCTCGCGGGTCTCCGCCCTCGCCCACTCACTGCGCCAGGCCAGGC 422
CGGGCATTGCCGCGCCGCCTCCGCCGGTGTAGACGGCACTGCGCGCCTTGCTCGCGGGTCTCCGCCCTCGCCCACTCACTGCGCCAGGCCAGGC 408

      1410      1420      1430      1440      1450      1460      1470      1480      1490      1500
AGCTCACCTGTACTGGCGCGGGCTGCGGAAACCTGCGTGA GCCAGGCGTTGAGGCGCGGCGGCCACGCCACTGTCCCGAGAGGACGCAGGTGGAGCGGG 1500
AGCTCACCTGTACTGGCGCGGGCTGCGGAAACCTGCGTGA GCCAGGCGTTGAGGCGCGGCGGCCACGCCACTGTCCCGAGAGGACGCAGGTGGAGCGGG 531
                                                                20
                                                                252
                                                                1
                                                                31
AGCTCACCTGTACTGGCGCGGGCTGCGGAAACCTGCGTGA GCCAGGCGTTGAGGCGCGGCGGCCACGCCACTGTCCCGAGAGGACGCAGGTGGAGCGGG 359
                                                                27
AGCTCACCTGTACTGGCGCGGGCTGCGGAAACCTGCGTGA GCCAGGCGTTGAGGCGCGGCGGCCACGCCACTGTCCCGAGAGGACGCAGGTGGAGCGGG 583
AGCTCACCTGTACTGGCGCGGGCTGCGGAAACCTGCGTGA GCCAGGCGTTGAGGCGCGGCGGCCACGCCACTGTCCCGAGAGGACGCAGGTGGAGCGGG 522
AGCTCACCTGTACTGGCGCGGGCTGCGGAAACCTGCGTGA GCCAGGCGTTGAGGCGCGGCGGCCACGCCACTGTCCCGAGAGGACGCAGGTGGAGCGGG 508

      1510      1520      1530      1540      1550      1560      1570      1580      1590      1600
CGCGGCTTCGCGGAACCCGGCGCCGCCGCCGCAAGTGGTCCAGCCTACACCGGGTTCGGGGGACCCGGCCGCCAGTGCCCGGGGAGTAGCCGCCGCCGT 1600
CGCGGCTTCGCGGAACCCGGCGCCGCCGCCGCAAGTGGTCCAGCCTACACCGGGTTCGGGGGACCCGGCCGCCAGTGCCCGGGGAGTAGCCGCCGCCGT 631
                                                                20
                                                                252
                                                                1
                                                                31
CGCGGCTTCGCGGAACCCGGCGCCGCCGCCGCAAGTGGTCCAGCCTACACCGGGTTCGGGGGACCCGGCCGCCAGTGCCCGGGGAGTAGCCGCCGCCGT 459
                                                                25
CGCGGCTTCGCGGAACCCGGCGCCGCCGCCGCAAGTGGTCCAGCCTACACCGGGTTCGGGGGACCCGGCCGCCAGTGCCCGGGGAGTAGCCGCCGCCGT 683
CGCGGCTTCGCGGAACCCGGCGCCGCCGCCGCAAGTGGTCCAGCCTACACCGGGTTCGGGGGACCCGGCCGCCAGTGCCCGGGGAGTAGCCGCCGCCGT 622
CGCGGCTTCGCGGAACCCGGCGCCGCCGCCGCAAGTGGTCCAGCCTACACCGGGTTCGGGGGACCCGGCCGCCAGTGCCCGGGGAGTAGCCGCCGCCGT 608
```

pCMV8-XL4\_SC119159\_Deduced  
AHR\_201\_Hum\_ENST00000242057.8  
Primer\_Up\_pCMV8-XL4\_918-937  
Upper\_overlap\_SC119159\_918-1169  
Primer\_AHR\_ENST200-170\_185G\_rev  
Primer\_AHR\_ENST173-203\_185G\_fwd  
Lower\_overlap\_SC119159\_1142-1612  
Primer\_Down\_AHR\_ENST643-630\_XhoI  
pCMV8-XL4\_SC119159\_918-1612\_XhoI  
EcoRI-XhoI\_SC119159\_979-1612  
5'-UTR\_SC119159\_993-1612

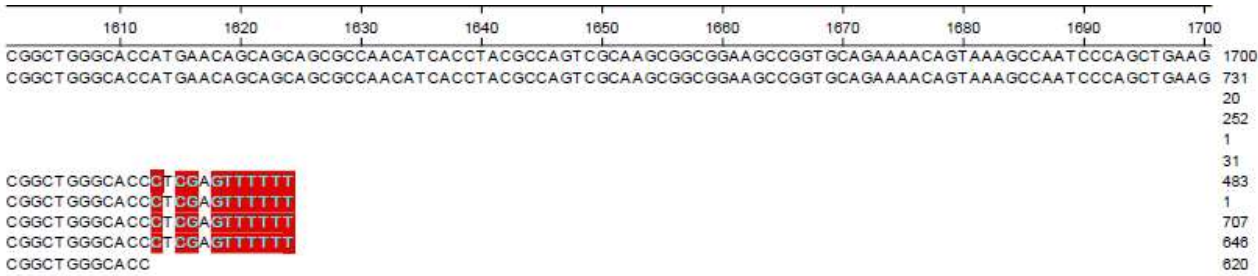

Supplement: msaa287_supplementary_data.zip [file msaa287_supplementary_data.zip › SI7_AHR 5'UTR Mutagenesis.pdf]
