# Supplementary material for: Evolution of Hominin Detoxification: Neanderthal and Modern Human Ah Receptor Respond Similarly to TCDD
Source: Oxford University Press journal article supplement (doi:10.1093/molbev/msaa287), 2020-11-04
Supplement: msaa287_supplementary_data.zip [file msaa287_supplementary_data.zip]

Archive with 10 entries (10 files):
- SI10_SeqRetrieval.pdf
- SI1_AHR cDNA Alignment.pdf
- SI2_ModernHuman_AHR_cDNA.txt
- SI3_AltaiNeanderthal_AHR_cDNA.txt
- SI4_Mathematical_Modeling_Text.pdf
- SI5_Mathematical_Modeling_Calculations.xlsx
- SI6_AHR_5'-UTR_185Variant.pdf
- SI7_AHR 5'UTR Mutagenesis.pdf
- SI8_Primer List.xlsx
- SI9_AHR_Protein.pdf
