# Supplementary material for: Evolution of Hominin Detoxification: Neanderthal and Modern Human Ah Receptor Respond Similarly to TCDD
Source: Oxford University Press journal article supplement (doi:10.1093/molbev/msaa287), 2020-11-04
Supplement: msaa287_supplementary_data.zip [file msaa287_supplementary_data.zip › SI1_AHR cDNA Alignment.pdf]

## Supplementary Information SI1

### Alignment of cDNA Copies of the *AHR* mRNA Sequence Variants Studied

The MegAlign module of the DNASTAR LaserGene 10 Core Suite was used. Sequence differences with the present-day human reference *AHR* transcript sequence (upper line; curated “gold” standard transcript AHR-201; Ensembl code ENST00000242057.8) are highlighted in red. The synthesized complete modern human *AHR* cDNA sequence derived from ENST00000242057.8 is aligned below (AHR\_Modern.seq), and on the third line the complete Altai-Neanderthal cDNA sequence (AHR\_Neanderthal.seq) synthesized according to Prüfer et al. (2014) [*Nature* 505:43-49]. The extra 3'-terminal T of these synthesis products was added based on the RefSeq *AHR* transcript NM\_001621.4, which is also curated. The respective sequence files of the modern human and Neanderthal *AHR* cDNA synthesized are available in FASTA format (Supplementary Information, SI2 and SI3, respectively). To show the difference with the *AHR* mRNA coding region sequence investigated by Hubbard et al. (2016) [*Mol Biol Evol* 33(10):2648–2658], the next three lines show the alignment of the coding region of the reference *AHR* mRNA (AHR\_201\_Hum\_ENST00000245057.8\_CDS.seq), and the codon-optimized modern human *AHR* cDNA synthesized as the parent sequence (AHR\_Modern\_Hubbard.seq) for the generation of their Neanderthal *AHR* cDNA (AHR\_Neanderthal\_Hubbard.seq) by mutagenesis (two codons indicated by a green arrow).

|                                       |                                                          |     |     |     |     |     |
|---------------------------------------|----------------------------------------------------------|-----|-----|-----|-----|-----|
|                                       | 10                                                       | 20  | 30  | 40  | 50  |     |
| AHR_201_Hum_ENST00000242057.8.seq     | ATT CAGCCGGT GCGCGCGGCGGCGGAGGCA GTGGCT GGGGAGT CCCGT C  |     |     |     |     | 50  |
| AHR_Modern.seq                        | ATT CA GCCGGT GCGCGCGGCGGCGGAGGCA GTGGCT GGGGAGT CCCGT C |     |     |     |     | 50  |
| AHR_Neanderthal.seq                   | ATT CAGCCGGT GCGCGCGGCGGCGGAGGCA GTGGCT GGGGAGT CCCGT C  |     |     |     |     | 50  |
| AHR_201_Hum_ENST00000242057.8_CDS.seq | -----                                                    |     |     |     |     | 0   |
| AHR_Modern_Hubbard.seq                | -----                                                    |     |     |     |     | 0   |
| AHR_Neanderthal_Hubbard.seq           | -----                                                    |     |     |     |     | 0   |
|                                       | 60                                                       | 70  | 80  | 90  | 100 |     |
| AHR_201_Hum_ENST00000242057.8.seq     | GACGCTCT GTTCCGAGAGCGT GCCCCGGACCGCCAGCT CAGAACAGGGGC    |     |     |     |     | 100 |
| AHR_Modern.seq                        | GACGCTCT GTTCCGAGAGCGT GCCCCGGACCGCCAGCT CAGAACAGGGGC    |     |     |     |     | 100 |
| AHR_Neanderthal.seq                   | GACGCTCT GTTCCGAGAGCGT GCCCCGGACCGCCAGCT CAGAACAGGGGC    |     |     |     |     | 100 |
| AHR_201_Hum_ENST00000242057.8_CDS.seq | -----                                                    |     |     |     |     | 0   |
| AHR_Modern_Hubbard.seq                | -----                                                    |     |     |     |     | 0   |
| AHR_Neanderthal_Hubbard.seq           | -----                                                    |     |     |     |     | 0   |
|                                       | 110                                                      | 120 | 130 | 140 | 150 |     |
| AHR_201_Hum_ENST00000242057.8.seq     | AGCCGTGT AGCCGAACGGAAGCT GGGAGCAGCCGGGACT GGTGGCCCGCG    |     |     |     |     | 150 |
| AHR_Modern.seq                        | AGCCGTGT AGCCGAACGGAAGCT GGGAGCAGCCGGGACT GGTGGCCCGCG    |     |     |     |     | 150 |
| AHR_Neanderthal.seq                   | AGCCGTGT AGCCGAACGGAAGCT GGGAGCAGCCGGGACT GGTGGCCCGCG    |     |     |     |     | 150 |
| AHR_201_Hum_ENST00000242057.8_CDS.seq | -----                                                    |     |     |     |     | 0   |
| AHR_Modern_Hubbard.seq                | -----                                                    |     |     |     |     | 0   |
| AHR_Neanderthal_Hubbard.seq           | -----                                                    |     |     |     |     | 0   |
|                                       | 160                                                      | 170 | 180 | 190 | 200 |     |
| AHR_201_Hum_ENST00000242057.8.seq     | CCCGAGCT CCGCAGGCGGGAAGCACCCCTGGATTTAGGAAGT CCCGGGAGC    |     |     |     |     | 200 |
| AHR_Modern.seq                        | CCCGAGCT CCGCAGGCGGGAAGCACCCCTGGATTTAGGAAGT CCCGGGAGC    |     |     |     |     | 200 |
| AHR_Neanderthal.seq                   | CCCGAGCT CCGCAGGCGGGAAGCACCCCTGGATTTAGGAAGT CCCGGGAGC    |     |     |     |     | 200 |
| AHR_201_Hum_ENST00000242057.8_CDS.seq | -----                                                    |     |     |     |     | 0   |
| AHR_Modern_Hubbard.seq                | -----                                                    |     |     |     |     | 0   |
| AHR_Neanderthal_Hubbard.seq           | -----                                                    |     |     |     |     | 0   |
|                                       | 210                                                      | 220 | 230 | 240 | 250 |     |
| AHR_201_Hum_ENST00000242057.8.seq     | AGCGCGGCGGCACCTCCCTCACCCAAGGGGCCGCGGCACGTCACGGGG         |     |     |     |     | 250 |
| AHR_Modern.seq                        | AGCGCGGCGGCACCTCCCTCACCCAAGGGGCCGCGGCACGTCACGGGG         |     |     |     |     | 250 |
| AHR_Neanderthal.seq                   | AGCGCGGCGGCACCTCCCTCACCCAAGGGGCCGCGGCACGTCACGGGG         |     |     |     |     | 250 |
| AHR_201_Hum_ENST00000242057.8_CDS.seq | -----                                                    |     |     |     |     | 0   |
| AHR_Modern_Hubbard.seq                | -----                                                    |     |     |     |     | 0   |
| AHR_Neanderthal_Hubbard.seq           | -----                                                    |     |     |     |     | 0   |
|                                       | 260                                                      | 270 | 280 | 290 | 300 |     |
| AHR_201_Hum_ENST00000242057.8.seq     | CGCGGCGGCCACCGTGAGCGACCCAGGCCAGGATTCTAAATAGACGGGCCA      |     |     |     |     | 300 |
| AHR_Modern.seq                        | CGCGGCGGCCACCGTGAGCGACCCAGGCCAGGATTCTAAATAGACGGGCCA      |     |     |     |     | 300 |
| AHR_Neanderthal.seq                   | CGCGGCGGCCACCGTGAGCGACCCAGGCCAGGATTCTAAATAGACGGGCCA      |     |     |     |     | 300 |
| AHR_201_Hum_ENST00000242057.8_CDS.seq | -----                                                    |     |     |     |     | 0   |
| AHR_Modern_Hubbard.seq                | -----                                                    |     |     |     |     | 0   |
| AHR_Neanderthal_Hubbard.seq           | -----                                                    |     |     |     |     | 0   |

AHR\_201\_Hum\_ENST00000242057.8.seq  
AHR\_Modern.seq  
AHR\_Neanderthal.seq  
AHR\_201\_Hum\_ENST00000242057.8\_CDS.seq  
AHR\_Modern\_Hubbard.seq  
AHR\_Neanderthal\_Hubbard.seq

```
310      320      330      340      350
GGCTCCTCCTCCGCCCGGGCCGCCTCACCTGCGGGCATTGCCGCGCCGCC 350
GGCTCCTCCTCCGCCCGGGCCGCCTCACCTGCGGGCATTGCCGCGCCGCC 350
GGCTCCTCCTCCGCCCGGGCCGCCTCACCTGCGGGCATTGCCGCGCCGCC 350
----- 0
----- 0
----- 0
```

AHR\_201\_Hum\_ENST00000242057.8.seq  
AHR\_Modern.seq  
AHR\_Neanderthal.seq  
AHR\_201\_Hum\_ENST00000242057.8\_CDS.seq  
AHR\_Modern\_Hubbard.seq  
AHR\_Neanderthal\_Hubbard.seq

```
360      370      380      390      400
TCCGCCGGTGTAGACGGCACCTGCGCCGCCTTGCTCGCGGGTCTCCGCC 400
TCCGCCGGTGTAGACGGCACCTGCGCCGCCTTGCTCGCGGGTCTCCGCC 400
TCCGCCGGTGTAGACGGCACCTGCGCCGCCTTGCTCGCGGGTCTCCGCC 400
----- 0
----- 0
----- 0
```

AHR\_201\_Hum\_ENST00000242057.8.seq  
AHR\_Modern.seq  
AHR\_Neanderthal.seq  
AHR\_201\_Hum\_ENST00000242057.8\_CDS.seq  
AHR\_Modern\_Hubbard.seq  
AHR\_Neanderthal\_Hubbard.seq

```
410      420      430      440      450
CTCGCCACCTCACTGCGCCAGGCCAGGCAGCTCACCTGTACTGGCGC 450
CTCGCCACCTCACTGCGCCAGGCCAGGCAGCTCACCTGTACTGGCGC 450
CTCGCCACCTCACTGCGCCAGGCCAGGCAGCTCACCTGTACTGGCGC 450
----- 0
----- 0
----- 0
```

AHR\_201\_Hum\_ENST00000242057.8.seq  
AHR\_Modern.seq  
AHR\_Neanderthal.seq  
AHR\_201\_Hum\_ENST00000242057.8\_CDS.seq  
AHR\_Modern\_Hubbard.seq  
AHR\_Neanderthal\_Hubbard.seq

```
460      470      480      490      500
GGGCTGCGGAAGCCTGCGTGAGCCGAGGCGTTGAGGCGCGGCGCCACGC 500
GGGCTGCGGAAGCCTGCGTGAGCCGAGGCGTTGAGGCGCGGCGCCACGC 500
GGGCTGCGGAAGCCTGCGTGAGCCGAGGCGTTGAGGCGCGGCGCCACGC 500
----- 0
----- 0
----- 0
```

AHR\_201\_Hum\_ENST00000242057.8.seq  
AHR\_Modern.seq  
AHR\_Neanderthal.seq  
AHR\_201\_Hum\_ENST00000242057.8\_CDS.seq  
AHR\_Modern\_Hubbard.seq  
AHR\_Neanderthal\_Hubbard.seq

```
510      520      530      540      550
CACTGTCCCGAGAGGACGCAAGTGAGCGGGCGCGGCTTCGCGGAACCCG 550
CACTGTCCCGAGAGGACGCAAGTGAGCGGGCGCGGCTTCGCGGAACCCG 550
CACTGTCCCGAGAGGACGCAAGTGAGCGGGCGCGGCTTCGCGGAACCCG 550
----- 0
----- 0
----- 0
```

AHR\_201\_Hum\_ENST00000242057.8.seq  
AHR\_Modern.seq  
AHR\_Neanderthal.seq  
AHR\_201\_Hum\_ENST00000242057.8\_CDS.seq  
AHR\_Modern\_Hubbard.seq  
AHR\_Neanderthal\_Hubbard.seq

```
560      570      580      590      600
GCGCCGGCCGCCGCAAGTGGTCCCAGCCTACACCGGTTCCGGGGACCCGG 600
GCGCCGGCCGCCGCAAGTGGTCCCAGCCTACACCGGTTCCGGGGACCCGG 600
GCGCCGGCCGCCGCAAGTGGTCCCAGCCTACACCGGTTCCGGGGACCCGG 600
----- 0
----- 0
----- 0
```

AHR\_201\_Hum\_ENST00000242057.8.seq  
AHR\_Modern.seq  
AHR\_Neanderthal.seq  
AHR\_201\_Hum\_ENST00000242057.8\_CDS.seq  
AHR\_Modern\_Hubbard.seq  
AHR\_Neanderthal\_Hubbard.seq

```
610      620      630      640      650
CCGCCAGTGCCCGGGGAGTAGCCGCCGCGTGGCTGGGCACCATGAACA 650
CCGCCAGTGCCCGGGGAGTAGCCGCCGCGTGGCTGGGCACCATGAACA 650
CCGCCAGTGCCCGGGGAGTAGCCGCCGCGTGGCTGGGCACCATGAACA 650
----- ATGAACA 7
----- ATGAACA 7
----- ATGAACA 7
```

AHR\_201\_Hum\_ENST00000242057.8.seq  
AHR\_Modern.seq  
AHR\_Neanderthal.seq  
AHR\_201\_Hum\_ENST00000242057.8\_CDS.seq  
AHR\_Modern\_Hubbard.seq  
AHR\_Neanderthal\_Hubbard.seq

```
660      670      680      690      700
GCAGCAGCGCCAACATCACCTACGCCAGTCGCAAGCGGCGGAAGCCGGTG 700
GCAGCAGCGCCAACATCACCTACGCCAGTCGCAAGCGGCGGAAGCCGGTG 700
GCAGCAGCGCCAACATCACCTACGCCAGTCGCAAGCGGCGGAAGCCGGTG 700
GCAGCAGCGCCAACATCACCTACGCCAGTCGCAAGCGGCGGAAGCCGGTG 57
GCAGCAGCGCTAACATCACCTACGCTAGCGCGGAACGGCGGAAGCCGTG 57
GCAGCAGCGCTAACATCACCTACGCTAGCGCGGAACGGCGGAAGCCGTG 57
```

AHR\_201\_Hum\_ENST00000242057.8.seq  
AHR\_Modern.seq  
AHR\_Neanderthal.seq  
AHR\_201\_Hum\_ENST00000242057.8\_CDS.seq  
AHR\_Modern\_Hubbard.seq  
AHR\_Neanderthal\_Hubbard.seq

```
710      720      730      740      750
CAGAAAACAGTAAAGCCAATCCCAGCTGAAGGAATCAAGTCAAATCCTTC 750
CAGAAAACAGTAAAGCCAATCCCAGCTGAAGGAATCAAGTCAAATCCTTC 750
CAGAAAACAGTAAAGCCAATCCCAGCTGAAGGAATCAAGTCAAATCCTTC 750
CAGAAAACAGTAAAGCCAATCCCAGCTGAAGGAATCAAGTCAAATCCTTC 107
CAGAAAACAGTAAAGCCAATCCCAGCTGAAGGAATCAAGTCAAATCCTTC 107
CAGAAAACAGTAAAGCCAATCCCAGCTGAAGGAATCAAGTCAAATCCTTC 107
```

AHR\_201\_Hum\_ENST00000242057.8.seq  
AHR\_Modern.seq  
AHR\_Neanderthal.seq  
AHR\_201\_Hum\_ENST00000242057.8\_CDS.seq  
AHR\_Modern\_Hubbard.seq  
AHR\_Neanderthal\_Hubbard.seq

```
760      770      780      790      800
CAAGCGGCATAGAGACCGACTTAATACAGAGTTGGACCGTTTGGCTAGCC 800
CAAGCGGCATAGAGACCGACTTAATACAGAGTTGGACCGTTTGGCTAGCC 800
CAAGCGGCATAGAGACCGACTTAATACAGAGTTGGACCGTTTGGCTAGCC 800
CAAGCGGCATAGAGACCGACTTAATACAGAGTTGGACCGTTTGGCTAGCC 157
CAAAACGGCACCGGGATTCGGCTGAACACCGAACTGGATTCGGCTGGCTAGCC 157
CAAAACGGCACCGGGATTCGGCTGAACACCGAACTGGATTCGGCTGGCTAGCC 157
```

AHR\_201\_Hum\_ENST00000242057.8.seq  
AHR\_Modern.seq  
AHR\_Neanderthal.seq  
AHR\_201\_Hum\_ENST00000242057.8\_CDS.seq  
AHR\_Modern\_Hubbard.seq  
AHR\_Neanderthal\_Hubbard.seq

```
810      820      830      840      850
TGCTGCCTTTCCACAAAGATGTTATTAATAAGTTGGACAAACTTTTCAGTT 850
TGCTGCCTTTCCACAAAGATGTTATTAATAAGTTGGACAAACTTTTCAGTT 850
TGCTGCCTTTCCACAAAGATGTTATTAATAAGTTGGACAAACTTTTCAGTT 850
TGCTGCCTTTCCACAAAGATGTTATTAATAAGTTGGACAAACTTTTCAGTT 207
TGCTGCCTTTCCACAAAGATGTTATTAATAAGTTGGACAAACTTTTCAGTT 207
TGCTGCCTTTCCACAAAGATGTTATTAATAAGTTGGACAAACTTTTCAGTT 207
```

AHR\_201\_Hum\_ENST00000242057.8.seq  
AHR\_Modern.seq  
AHR\_Neanderthal.seq  
AHR\_201\_Hum\_ENST00000242057.8\_CDS.seq  
AHR\_Modern\_Hubbard.seq  
AHR\_Neanderthal\_Hubbard.seq

```
860      870      880      890      900
CTTAGGCTCAGCGTCAGTTACCTGAGAGCCAAGAGCTTCTTTGATGTTGC 900
CTTAGGCTCAGCGTCAGTTACCTGAGAGCCAAGAGCTTCTTTGATGTTGC 900
CTTAGGCTCAGCGTCAGTTACCTGAGAGCCAAGAGCTTCTTTGATGTTGC 900
CTTAGGCTCAGCGTCAGTTACCTGAGAGCCAAGAGCTTCTTTGATGTTGC 257
CTTAGGCTCAGCGTCAGTTACCTGAGAGCCAAGAGCTTCTTTGATGTTGC 257
CTTAGGCTCAGCGTCAGTTACCTGAGAGCCAAGAGCTTCTTTGATGTTGC 257
```

AHR\_201\_Hum\_ENST00000242057.8.seq  
AHR\_Modern.seq  
AHR\_Neanderthal.seq  
AHR\_201\_Hum\_ENST00000242057.8\_CDS.seq  
AHR\_Modern\_Hubbard.seq  
AHR\_Neanderthal\_Hubbard.seq

```
910      920      930      940      950
ATTAAAATCCTCCCCTACTGAAAGAAACGGAGGCCAGGATAACTGTAGAG 950
ATTAAAATCCTCCCCTACTGAAAGAAACGGAGGCCAGGATAACTGTAGAG 950
ATTAAAATCCTCCCCTACTGAAAGAAACGGAGGCCAGGATAACTGTAGAG 950
ATTAAAATCCTCCCCTACTGAAAGAAACGGAGGCCAGGATAACTGTAGAG 307
ATTAAAATCCTCCCCTACTGAAAGAAACGGAGGCCAGGATAACTGTAGAG 307
ATTAAAATCCTCCCCTACTGAAAGAAACGGAGGCCAGGATAACTGTAGAG 307
```

AHR\_201\_Hum\_ENST00000242057.8.seq  
AHR\_Modern.seq  
AHR\_Neanderthal.seq  
AHR\_201\_Hum\_ENST00000242057.8\_CDS.seq  
AHR\_Modern\_Hubbard.seq  
AHR\_Neanderthal\_Hubbard.seq

```
960      970      980      990      1000
CAGCAAATTTTCAGAGAAGGCCTGAACCTTACAAGAGGAGAAATTTCTATTA 1000
CAGCAAATTTTCAGAGAAGGCCTGAACCTTACAAGAGGAGAAATTTCTATTA 1000
CAGCAAATTTTCAGAGAAGGCCTGAACCTTACAAGAGGAGAAATTTCTATTA 1000
CAGCAAATTTTCAGAGAAGGCCTGAACCTTACAAGAGGAGAAATTTCTATTA 357
CAGCAAATTTTCAGAGAAGGCCTGAACCTTACAAGAGGAGAAATTTCTATTA 357
CAGCAAATTTTCAGAGAAGGCCTGAACCTTACAAGAGGAGAAATTTCTATTA 357
```

AHR\_201\_Hum\_ENST00000242057.8.seq  
AHR\_Modern.seq  
AHR\_Neanderthal.seq  
AHR\_201\_Hum\_ENST00000242057.8\_CDS.seq  
AHR\_Modern\_Hubbard.seq  
AHR\_Neanderthal\_Hubbard.seq

```
1010     1020     1030     1040     1050
CAGGCTCTGAATGGCTTTGTATTAGTTGTCACTACAGATGCTTTGGTCTT 1050
CAGGCTCTGAATGGCTTTGTATTAGTTGTCACTACAGATGCTTTGGTCTT 1050
CAGGCTCTGAATGGCTTTGTATTAGTTGTCACTACAGATGCTTTGGTCTT 1050
CAGGCTCTGAATGGCTTTGTATTAGTTGTCACTACAGATGCTTTGGTCTT 407
CAGGCTCTGAATGGCTTTGTATTAGTTGTCACTACAGATGCTTTGGTCTT 407
CAGGCTCTGAATGGCTTTGTATTAGTTGTCACTACAGATGCTTTGGTCTT 407
```

AHR\_201\_Hum\_ENST00000242057.8.seq  
AHR\_Modern.seq  
AHR\_Neanderthal.seq  
AHR\_201\_Hum\_ENST00000242057.8\_CDS.seq  
AHR\_Modern\_Hubbard.seq  
AHR\_Neanderthal\_Hubbard.seq

```
1060     1070     1080     1090     1100
TTATGCTTCTTCTACTATACAAGATTATCTAGGGTTTCAGCAGTCTGATG 1100
TTATGCTTCTTCTACTATACAAGATTATCTAGGGTTTCAGCAGTCTGATG 1100
TTATGCTTCTTCTACTATACAAGATTATCTAGGGTTTCAGCAGTCTGATG 1100
TTATGCTTCTTCTACTATACAAGATTATCTAGGGTTTCAGCAGTCTGATG 457
TTATGCTTCTTCTACTATACAAGATTATCTAGGGTTTCAGCAGTCTGATG 457
TTATGCTTCTTCTACTATACAAGATTATCTAGGGTTTCAGCAGTCTGATG 457
```

AHR\_201\_Hum\_ENST00000242057.8.seq  
AHR\_Modern.seq  
AHR\_Neanderthal.seq  
AHR\_201\_Hum\_ENST00000242057.8\_CDS.seq  
AHR\_Modern\_Hubbard.seq  
AHR\_Neanderthal\_Hubbard.seq

```
1110     1120     1130     1140     1150
TCATACATCAGAGTGTATATGAACCTTATCCATACCGAAGACCGAGCTGAA 1150
TCATACATCAGAGTGTATATGAACCTTATCCATACCGAAGACCGAGCTGAA 1150
TCATACATCAGAGTGTATATGAACCTTATCCATACCGAAGACCGAGCTGAA 1150
TCATACATCAGAGTGTATATGAACCTTATCCATACCGAAGACCGAGCTGAA 507
TCATACATCAGAGTGTATATGAACCTTATCCATACCGAAGACCGAGCTGAA 507
TCATACATCAGAGTGTATATGAACCTTATCCATACCGAAGACCGAGCTGAA 507
```

AHR\_201\_Hum\_ENST00000242057.8.seq  
AHR\_Modern.seq  
AHR\_Neanderthal.seq  
AHR\_201\_Hum\_ENST00000242057.8\_CDS.seq  
AHR\_Modern\_Hubbard.seq  
AHR\_Neanderthal\_Hubbard.seq

```
1160     1170     1180     1190     1200
TTTCAGCGTCAGCTACACTGGGCATTAATCCTTCTCAGTGTACAGAGTC 1200
TTTCAGCGTCAGCTACACTGGGCATTAATCCTTCTCAGTGTACAGAGTC 1200
TTTCAGCGTCAGCTACACTGGGCATTAATCCTTCTCAGTGTACAGAGTC 1200
TTTCAGCGTCAGCTACACTGGGCATTAATCCTTCTCAGTGTACAGAGTC 557
TTTCAGCGTCAGCTACACTGGGCATTAATCCTTCTCAGTGTACAGAGTC 557
TTTCAGCGTCAGCTACACTGGGCATTAATCCTTCTCAGTGTACAGAGTC 557
```

AHR\_201\_Hum\_ENST00000242057.8.seq  
AHR\_Modern.seq  
AHR\_Neanderthal.seq  
AHR\_201\_Hum\_ENST00000242057.8\_CDS.seq  
AHR\_Modern\_Hubbard.seq  
AHR\_Neanderthal\_Hubbard.seq

```
1210      1220      1230      1240      1250
TGGACAAGGAATTGAAGAAGCCACTGGTCTCCCCAGACAGTAGTCTGTT 1250
TGGACAAGGAATTGAAGAAGCCACTGGTCTCCCCAGACAGTAGTCTGTT 1250
TGGACAAGGAATTGAAGAAGCCACTGGTCTCCCCAGACAGTAGTCTGTT 1250
TGGACAAGGAATTGAAGAAGCCACTGGTCTCCCCAGACAGTAGTCTGTT 607
CGGCGAGGGGATCGAAGAAGCTACCGGCTCCCCAGACAGTGGTGTGCT 607
CGGCGAGGGGATCGAAGAAGCTACCGGCTCCCCAGACAGTGGTGTGCT 607
```

AHR\_201\_Hum\_ENST00000242057.8.seq  
AHR\_Modern.seq  
AHR\_Neanderthal.seq  
AHR\_201\_Hum\_ENST00000242057.8\_CDS.seq  
AHR\_Modern\_Hubbard.seq  
AHR\_Neanderthal\_Hubbard.seq

```
1260      1270      1280      1290      1300
ATAACCCAGACCAGATTCTCCAGAAAACCTCTCCTTTAATGGAGAGGTGC 1300
ATAACCCAGACCAGATTCTCCAGAAAACCTCTCCTTTAATGGAGAGGTGC 1300
ATAACCCAGACCAGATTCTCCAGAAAACCTCTCCTTTAATGGAGAGGTGC 1300
ATAACCCAGACCAGATTCTCCAGAAAACCTCTCCTTTAATGGAGAGGTGC 657
ACAACCCGATCAGATCCCCCGAAAACAGCCCTGATGGAACGGTGC 657
ACAACCCGATCAGATCCCCCGAAAACAGCCCTGATGGAACGGTGC 657
```

AHR\_201\_Hum\_ENST00000242057.8.seq  
AHR\_Modern.seq  
AHR\_Neanderthal.seq  
AHR\_201\_Hum\_ENST00000242057.8\_CDS.seq  
AHR\_Modern\_Hubbard.seq  
AHR\_Neanderthal\_Hubbard.seq

```
1310      1320      1330      1340      1350
TTCATATGTCGTCTAAGGTGTCTGCTGGATAATTCACTCTGTTTCTGGC 1350
TTCATATGTCGTCTAAGGTGTCTGCTGGATAATTCACTCTGTTTCTGGC 1350
TTCATATGTCGTCTAAGGTGTCTGCTGGATAATTCACTCTGTTTCTGGC 1350
TTCATATGTCGTCTAAGGTGTCTGCTGGATAATTCACTCTGTTTCTGGC 707
TTCATCTGCGGCTGGGTGCTGCTGATAACAGCAGCGGCTTCTCTGGC 707
TTCATCTGCGGCTGGGTGCTGCTGATAACAGCAGCGGCTTCTCTGGC 707
```

AHR\_201\_Hum\_ENST00000242057.8.seq  
AHR\_Modern.seq  
AHR\_Neanderthal.seq  
AHR\_201\_Hum\_ENST00000242057.8\_CDS.seq  
AHR\_Modern\_Hubbard.seq  
AHR\_Neanderthal\_Hubbard.seq

```
1360      1370      1380      1390      1400
AATGAATTTCCAAGGGAAGTTAAAGTATCTTCATGGACAGAAAAAGAAAG 1400
AATGAATTTCCAAGGGAAGTTAAAGTATCTTCATGGACAGAAAAAGAAAG 1400
AATGAATTTCCAAGGGAAGTTAAAGTATCTTCATGGACAGAAAAAGAAAG 1400
AATGAATTTCCAAGGGAAGTTAAAGTATCTTCATGGACAGAAAAAGAAAG 757
CATGAATTTCCAAGGGAAGTTAAAGTATCTGCAAGGCAGAAAAAGAAAG 757
CATGAATTTCCAAGGGAAGTTAAAGTATCTGCAAGGCAGAAAAAGAAAG 757
```

AHR\_201\_Hum\_ENST00000242057.8.seq  
AHR\_Modern.seq  
AHR\_Neanderthal.seq  
AHR\_201\_Hum\_ENST00000242057.8\_CDS.seq  
AHR\_Modern\_Hubbard.seq  
AHR\_Neanderthal\_Hubbard.seq

```
1410      1420      1430      1440      1450
GGAAAGATGGATCAATACTTCCACCTCAGTTGGCTTTGTTTGCATAGCT 1450
GGAAAGATGGATCAATACTTCCACCTCAGTTGGCTTTGTTTGCATAGCT 1450
GGAAAGATGGATCAATACTTCCACCTCAGTTGGCTTTGTTTGCATAGCT 1450
GGAAAGATGGATCAATACTTCCACCTCAGTTGGCTTTGTTTGCATAGCT 807
GGAAAGATGGATCAATACTTCCACCTCAGTTGGCTTTGTTTGCATAGCT 807
GGAAAGATGGATCAATACTTCCACCTCAGTTGGCTTTGTTTGCATAGCT 807
```

AHR\_201\_Hum\_ENST00000242057.8.seq  
AHR\_Modern.seq  
AHR\_Neanderthal.seq  
AHR\_201\_Hum\_ENST00000242057.8\_CDS.seq  
AHR\_Modern\_Hubbard.seq  
AHR\_Neanderthal\_Hubbard.seq

```
1460      1470      1480      1490      1500
ACTCCAATTGAGCCACCATCCATACTTGAAATCCGGACCAAAAAATTTTAT 1500
ACTCCAATTGAGCCACCATCCATACTTGAAATCCGGACCAAAAAATTTTAT 1500
ACTCCAATTGAGCCACCATCCATACTTGAAATCCGGACCAAAAAATTTTAT 1500
ACTCCAATTGAGCCACCATCCATACTTGAAATCCGGACCAAAAAATTTTAT 857
ACCCCTGACAGCCCTCCAGCATCTGAAATCCGGACCAAAAAATTTTAT 857
ACCCCTGACAGCCCTCCAGCATCTGAAATCCGGACCAAAAAATTTTAT 857
```

AHR\_201\_Hum\_ENST00000242057.8.seq  
AHR\_Modern.seq  
AHR\_Neanderthal.seq  
AHR\_201\_Hum\_ENST00000242057.8\_CDS.seq  
AHR\_Modern\_Hubbard.seq  
AHR\_Neanderthal\_Hubbard.seq

```
1510      1520      1530      1540      1550
CTTTAGAACCAAAACACAACTAGACTTCACACCTATTGGTTGTGATGCCA 1550
CTTTAGAACCAAAACACAACTAGACTTCACACCTATTGGTTGTGATGCCA 1550
CTTTAGAACCAAAACACAACTAGACTTCACACCTATTGGTTGTGATGCCA 1550
CTTTAGAACCAAAACACAACTAGACTTCACACCTATTGGTTGTGATGCCA 907
CTTTGAGCAACCAAAACACAACTAGACTTCACACCTATTGGTTGTGATGCCA 907
CTTTGAGCAACCAAAACACAACTAGACTTCACACCTATTGGTTGTGATGCCA 907
```

AHR\_201\_Hum\_ENST00000242057.8.seq  
AHR\_Modern.seq  
AHR\_Neanderthal.seq  
AHR\_201\_Hum\_ENST00000242057.8\_CDS.seq  
AHR\_Modern\_Hubbard.seq  
AHR\_Neanderthal\_Hubbard.seq

```
1560      1570      1580      1590      1600
AAGGAAGAATTGTTTTAGGATATACTGAAGCAGAGCTGTGCACGAGAGGC 1600
AAGGAAGAATTGTTTTAGGATATACTGAAGCAGAGCTGTGCACGAGAGGC 1600
AAGGAAGAATTGTTTTAGGATATACTGAAGCAGAGCTGTGCACGAGAGGC 1600
AAGGAAGAATTGTTTTAGGATATACTGAAGCAGAGCTGTGCACGAGAGGC 957
AAGGCCGGATGCTGCTGGGTAGACCGAAGCTGAACTGTGCACACGGGGC 957
AAGGCCGGATGCTGCTGGGTAGACCGAAGCTGAACTGTGCACACGGGGC 957
```

AHR\_201\_Hum\_ENST00000242057.8.seq  
AHR\_Modern.seq  
AHR\_Neanderthal.seq  
AHR\_201\_Hum\_ENST00000242057.8\_CDS.seq  
AHR\_Modern\_Hubbard.seq  
AHR\_Neanderthal\_Hubbard.seq

```
1610      1620      1630      1640      1650
TCAGGTTATCAGTTTATTCATGCAGCTGATATGCTTTATTGTGCCGAGTC 1650
TCAGGTTATCAGTTTATTCATGCAGCTGATATGCTTTATTGTGCCGAGTC 1650
TCAGGTTATCAGTTTATTCATGCAGCTGATATGCTTTATTGTGCCGAGTC 1650
TCAGGTTATCAGTTTATTCATGCAGCTGATATGCTTTATTGTGCCGAGTC 1007
AGCGGCTACAGTTTATTCATGCAGCTGCTGATATGCTGTACTGGCCGAGAG 1007
AGCGGCTACAGTTTATTCATGCAGCTGCTGATATGCTGTACTGGCCGAGAG 1007
```

AHR\_201\_Hum\_ENST00000242057.8.seq  
AHR\_Modern.seq  
AHR\_Neanderthal.seq  
AHR\_201\_Hum\_ENST00000242057.8\_CDS.seq  
AHR\_Modern\_Hubbard.seq  
AHR\_Neanderthal\_Hubbard.seq

```
1660 1670 1680 1690 1700
CCATATCCGAATGATTAAGACTGGAGAAAGTGGCATGATAGTTTTCCGGC 1700
CCATATCCGAATGATTAAGACTGGAGAAAGTGGCATGATAGTTTTCCGGC 1700
CCATATCCGAATGATTAAGACTGGAGAAAGTGGCATGATAGTTTTCCGGC 1700
CCATATCCGAATGATTAAGACTGGAGAAAGTGGCATGATAGTTTTCCGGC 1057
CCATATCCGAATGATTAAGACTGGAGAAAGTGGCATGATAGTTTTCCGGC 1057
CCATATCCGAATGATTAAGACTGGAGAAAGTGGCATGATAGTTTTCCGGC 1057
```

AHR\_201\_Hum\_ENST00000242057.8.seq  
AHR\_Modern.seq  
AHR\_Neanderthal.seq  
AHR\_201\_Hum\_ENST00000242057.8\_CDS.seq  
AHR\_Modern\_Hubbard.seq  
AHR\_Neanderthal\_Hubbard.seq

```
1710 1720 1730 1740 1750
TTCTTACAAAAACAACCGATGGAAGTGGGTCCAGTCTAATGCACGCCTG 1750
TTCTTACAAAAACAACCGATGGAAGTGGGTCCAGTCTAATGCACGCCTG 1750
TTCTTACAAAAACAACCGATGGAAGTGGGTCCAGTCTAATGCACGCCTG 1750
TTCTTACAAAAACAACCGATGGAAGTGGGTCCAGTCTAATGCACGCCTG 1107
TGCTGACCAAAAAACAACCGATGGAAGTGGGTCCAGTCTAATGCACGCCTG 1107
TGCTGACCAAAAAACAACCGATGGAAGTGGGTCCAGTCTAATGCACGCCTG 1107
```

AHR\_201\_Hum\_ENST00000242057.8.seq  
AHR\_Modern.seq  
AHR\_Neanderthal.seq  
AHR\_201\_Hum\_ENST00000242057.8\_CDS.seq  
AHR\_Modern\_Hubbard.seq  
AHR\_Neanderthal\_Hubbard.seq

```
1760 1770 1780 1790 1800
CTTTATAAAAAAGGAAGACCAGATTATATCATTGTAAGTCAAGAGACCACT 1800
CTTTATAAAAAAGGAAGACCAGATTATATCATTGTAAGTCAAGAGACCACT 1800
CTTTATAAAAAAGGAAGACCAGATTATATCATTGTAAGTCAAGAGACCACT 1800
CTTTATAAAAAAGGAAGACCAGATTATATCATTGTAAGTCAAGAGACCACT 1157
CTTTATAAAAAAGGAAGACCAGATTATATCATTGTAAGTCAAGAGACCACT 1157
CTTTATAAAAAAGGAAGACCAGATTATATCATTGTAAGTCAAGAGACCACT 1157
```

AHR\_201\_Hum\_ENST00000242057.8.seq  
AHR\_Modern.seq  
AHR\_Neanderthal.seq  
AHR\_201\_Hum\_ENST00000242057.8\_CDS.seq  
AHR\_Modern\_Hubbard.seq  
AHR\_Neanderthal\_Hubbard.seq

```
1810 1820 1830 1840 1850
AACAGATGAGGAAGGAACAGAGCATTACGAAAAACGAAATACGAAGTTGC 1850
AACAGATGAGGAAGGAACAGAGCATTACGAAAAACGAAATACGAAGTTGC 1850
AACAGATGAGGAAGGAACAGAGCATTACGAAAAACGAAATACGAAGTTGC 1850
AACAGATGAGGAAGGAACAGAGCATTACGAAAAACGAAATACGAAGTTGC 1207
AACAGATGAGGAAGGAACAGAGCATTACGAAAAACGAAATACGAAGTTGC 1207
AACAGATGAGGAAGGAACAGAGCATTACGAAAAACGAAATACGAAGTTGC 1207
```

AHR\_201\_Hum\_ENST00000242057.8.seq  
AHR\_Modern.seq  
AHR\_Neanderthal.seq  
AHR\_201\_Hum\_ENST00000242057.8\_CDS.seq  
AHR\_Modern\_Hubbard.seq  
AHR\_Neanderthal\_Hubbard.seq

```
1860 1870 1880 1890 1900
CTTTTATGTTTACCACTGGAGAAGCTGTGTTGTATGAGGCAACCAACCCCT 1900
CTTTTATGTTTACCACTGGAGAAGCTGTGTTGTATGAGGCAACCAACCCCT 1900
CTTTTATGTTTACCACTGGAGAAGCTGTGTTGTATGAGGCAACCAACCCCT 1900
CTTTTATGTTTACCACTGGAGAAGCTGTGTTGTATGAGGCAACCAACCCCT 1257
CTTTTATGTTTACCACTGGAGAAGCTGTGTTGTATGAGGCAACCAACCCCT 1257
CTTTTATGTTTACCACTGGAGAAGCTGTGTTGTATGAGGCAACCAACCCCT 1257
```

AHR\_201\_Hum\_ENST00000242057.8.seq  
AHR\_Modern.seq  
AHR\_Neanderthal.seq  
AHR\_201\_Hum\_ENST00000242057.8\_CDS.seq  
AHR\_Modern\_Hubbard.seq  
AHR\_Neanderthal\_Hubbard.seq

```
1910 1920 1930 1940 1950
TTTCCTGCCATAATGGATCCCTTACCACTAAGGACTAAAAATGGCACTAG 1950
TTTCCTGCCATAATGGATCCCTTACCACTAAGGACTAAAAATGGCACTAG 1950
TTTCCTGCCATAATGGATCCCTTACCACTAAGGACTAAAAATGGCACTAG 1950
TTTCCTGCCATAATGGATCCCTTACCACTAAGGACTAAAAATGGCACTAG 1307
TTTCCTGCCATAATGGATCCCTTACCACTAAGGACTAAAAATGGCACTAG 1307
TTTCCTGCCATAATGGATCCCTTACCACTAAGGACTAAAAATGGCACTAG 1307
```

AHR\_201\_Hum\_ENST00000242057.8.seq  
AHR\_Modern.seq  
AHR\_Neanderthal.seq  
AHR\_201\_Hum\_ENST00000242057.8\_CDS.seq  
AHR\_Modern\_Hubbard.seq  
AHR\_Neanderthal\_Hubbard.seq

```
1960 1970 1980 1990 2000
TGGAAGAAAGACTCTGCTACCACATCCACTCTAAGCAAGGACTCTCTCAATC 2000
TGGAAGAAAGACTCTGCTACCACATCCACTCTAAGCAAGGACTCTCTCAATC 2000
TGGAAGAAAGACTCTGCTACCACATCCACTCTAAGCAAGGACTCTCTCAATC 2000
TGGAAGAAAGACTCTGCTACCACATCCACTCTAAGCAAGGACTCTCTCAATC 1357
TGGAAGAAAGACTCTGCTACCACATCCACTCTAAGCAAGGACTCTCTCAATC 1357
TGGAAGAAAGACTCTGCTACCACATCCACTCTAAGCAAGGACTCTCTCAATC 1357
```

AHR\_201\_Hum\_ENST00000242057.8.seq  
AHR\_Modern.seq  
AHR\_Neanderthal.seq  
AHR\_201\_Hum\_ENST00000242057.8\_CDS.seq  
AHR\_Modern\_Hubbard.seq  
AHR\_Neanderthal\_Hubbard.seq

```
2010 2020 2030 2040 2050
CTAGTTCCTCCTGGCTGCCATGATGCAACAAGATGAGTCTATTTATCTC 2050
CTAGTTCCTCCTGGCTGCCATGATGCAACAAGATGAGTCTATTTATCTC 2050
CTAGTTCCTCCTGGCTGCCATGATGCAACAAGATGAGTCTATTTATCTC 2050
CTAGTTCCTCCTGGCTGCCATGATGCAACAAGATGAGTCTATTTATCTC 1407
CTAGTTCCTCCTGGCTGCCATGATGCAACAAGATGAGTCTATTTATCTC 1407
CTAGTTCCTCCTGGCTGCCATGATGCAACAAGATGAGTCTATTTATCTC 1407
```

AHR\_201\_Hum\_ENST00000242057.8.seq  
AHR\_Modern.seq  
AHR\_Neanderthal.seq  
AHR\_201\_Hum\_ENST00000242057.8\_CDS.seq  
AHR\_Modern\_Hubbard.seq  
AHR\_Neanderthal\_Hubbard.seq

```
2060 2070 2080 2090 2100
TATCCTGCTTCAAGTACTTCAAGTACTGCACCTTTTGAACCAACTTTT 2100
TATCCTGCTTCAAGTACTTCAAGTACTGCACCTTTTGAACCAACTTTT 2100
TATCCTGCTTCAAGTACTTCAAGTACTGCACCTTTTGAACCAACTTTT 2100
TATCCTGCTTCAAGTACTTCAAGTACTGCACCTTTTGAACCAACTTTT 1457
TATCCTGCTTCAAGTACTTCAAGTACTGCACCTTTTGAACCAACTTTT 1457
TATCCTGCTTCAAGTACTTCAAGTACTGCACCTTTTGAACCAACTTTT 1457
```

AHR\_201\_Hum\_ENST00000242057.8.seq  
AHR\_Modern.seq  
AHR\_Neanderthal.seq  
AHR\_201\_Hum\_ENST00000242057.8\_CDS.seq  
AHR\_Modern\_Hubbard.seq  
AHR\_Neanderthal\_Hubbard.seq

```
2110      2120      2130      2140      2150
CAACGAATCTATGAATGAATGCAGAAATTGGCAAGATAAATACTGCACCGA 2150
CAACGAATCTATGAATGAATGCAGAAATTGGCAAGATAAATACTGCACCGA 2150
CAACGAATCTATGAATGAATGCAGAAATTGGCAAGATAAATACTGCACCGA 2150
CAACGAATCTATGAATGAATGCAGAAATTGGCAAGATAAATACTGCACCGA 1507
CAACGAAAGGATGAAAGAATGCGGGAATTGGCAGGATAAACACGCGCCCA 1507
CAACGAAAGGATGAAAGAATGCGGGAATTGGCAGGATAAACACGCGCCCA 1507
```

AHR\_201\_Hum\_ENST00000242057.8.seq  
AHR\_Modern.seq  
AHR\_Neanderthal.seq  
AHR\_201\_Hum\_ENST00000242057.8\_CDS.seq  
AHR\_Modern\_Hubbard.seq  
AHR\_Neanderthal\_Hubbard.seq

```
2160      2170      2180      2190      2200
TGGGAAATGATACTATCCTGAAACATGAGCAAATTGACCAGCCTCAGGAT 2200
TGGGAAATGATACTATCCTGAAACATGAGCAAATTGACCAGCCTCAGGAT 2200
TGGGAAATGATACTATCCTGAAACATGAGCAAATTGACCAGCCTCAGGAT 2200
TGGGAAATGATACTATCCTGAAACATGAGCAAATTGACCAGCCTCAGGAT 1557
TGGGAAAGATACCATCCTGAAACAAGAGCAGATGACCAGCCCAAGGAT 1557
TGGGAAAGATACCATCCTGAAACAAGAGCAGATGACCAGCCCAAGGAT 1557
```

AHR\_201\_Hum\_ENST00000242057.8.seq  
AHR\_Modern.seq  
AHR\_Neanderthal.seq  
AHR\_201\_Hum\_ENST00000242057.8\_CDS.seq  
AHR\_Modern\_Hubbard.seq  
AHR\_Neanderthal\_Hubbard.seq

```
2210      2220      2230      2240      2250
GTGAACTCATTTGCTGGAGGTCAACCCAGGGCTCTTTCAAGATAGTAAAAA 2250
GTGAACTCATTTGCTGGAGGTCAACCCAGGGCTCTTTCAAGATAGTAAAAA 2250
GTGAACTCATTTGCTGGAGGTCAACCCAGGGCTCTTTCAAGATAGTAAAAA 2250
GTGAACTCATTTGCTGGAGGTCAACCCAGGGCTCTTTCAAGATAGTAAAAA 1607
GTGAACAGCTTCGCTGGCGGCACCCCGGCTCTTTCAGATAGCAAAAAA 1607
GTGAACAGCTTCGCTGGCGGCACCCCGGCTCTTTCAGATAGCAAAAAA 1607
```

AHR\_201\_Hum\_ENST00000242057.8.seq  
AHR\_Modern.seq  
AHR\_Neanderthal.seq  
AHR\_201\_Hum\_ENST00000242057.8\_CDS.seq  
AHR\_Modern\_Hubbard.seq  
AHR\_Neanderthal\_Hubbard.seq

```
2260      2270      2280      2290      2300
CAGTGACTTGTACAGCATAATGAAAAACCTAGGCATTGATTTTGAAGACA 2300
CAGTGACTTGTACAGCATAATGAAAAACCTAGGCATTGATTTTGAAGACA 2300
CAGTGACTTGTACAGCATAATGAAAAACCTAGGCATTGATTTTGAAGACA 2300
CAGTGACTTGTACAGCATAATGAAAAACCTAGGCATTGATTTTGAAGACA 1657
CAGTGACCTGTACAGCATCATGAAAAACCTGGGCATCGATTTTGAAGACA 1657
CAGTGACCTGTACAGCATCATGAAAAACCTGGGCATCGATTTTGAAGACA 1657
```

AHR\_201\_Hum\_ENST00000242057.8.seq  
AHR\_Modern.seq  
AHR\_Neanderthal.seq  
AHR\_201\_Hum\_ENST00000242057.8\_CDS.seq  
AHR\_Modern\_Hubbard.seq  
AHR\_Neanderthal\_Hubbard.seq

```
2310      2320      2330      2340      2350
TCAGACACATGCAGAAATGAAAAATTTTTCAGAAATGATTTTCTGGTGAG 2350
TCAGACACATGCAGAAATGAAAAATTTTTCAGAAATGATTTTCTGGTGAG 2350
TCAGACACATGCAGAAATGAAAAATTTTTCAGAAATGATTTTCTGGTGAG 2350
TCAGACACATGCAGAAATGAAAAATTTTTCAGAAATGATTTTCTGGTGAG 1707
TCAGACACATGCAGAAATGAAAAATTTTTCAGAAATGATTTTTCAGCGGGGAA 1707
TCAGACACATGCAGAAATGAAAAATTTTTCAGAAATGATTTTTCAGCGGGGAA 1707
```

AHR\_201\_Hum\_ENST00000242057.8.seq  
AHR\_Modern.seq  
AHR\_Neanderthal.seq  
AHR\_201\_Hum\_ENST00000242057.8\_CDS.seq  
AHR\_Modern\_Hubbard.seq  
AHR\_Neanderthal\_Hubbard.seq

```
2360      2370      2380      2390      2400
GTTGACTTCAGAGACATTGACTTAACGGATGAAATCCTGACGTATGTCCA 2400
GTTGACTTCAGAGACATTGACTTAACGGATGAAATCCTGACGTATGTCCA 2400
GTTGACTTCAGAGACATTGACTTAACGGATGAAATCCTGACGTATGTCCA 2400
GTTGACTTCAGAGACATTGACTTAACGGATGAAATCCTGACGTATGTCCA 1757
GTGGACTTCGGGACATCGACCTGACCGATGAAATCCTGACCTACGTGCA 1757
GTGGACTTCGGGACATCGACCTGACCGATGAAATCCTGACCTACGTGCA 1757
```

AHR\_201\_Hum\_ENST00000242057.8.seq  
AHR\_Modern.seq  
AHR\_Neanderthal.seq  
AHR\_201\_Hum\_ENST00000242057.8\_CDS.seq  
AHR\_Modern\_Hubbard.seq  
AHR\_Neanderthal\_Hubbard.seq

```
2410      2420      2430      2440      2450
AGATTCTTTAAGTAAGTCTCCCTTCATACCTTCAGATTATCAACAGCAAC 2450
AGATTCTTTAAGTAAGTCTCCCTTCATACCTTCAGATTATCAACAGCAAC 2450
AGATTCTTTAAGTAAGTCTCCCTTCATACCTTCAGATTATCAACAGCAAC 2450
AGATTCTTTAAGTAAGTCTCCCTTCATACCTTCAGATTATCAACAGCAAC 1807
GGATAGCCTGAGCAAGAGCCCTTCATCCGAGCGATTACAGCAGCAGC 1807
GGATAGCCTGAGCAAGAGCCCTTCATCCGAGCGATTACAGCAGCAGC 1807
```

AHR\_201\_Hum\_ENST00000242057.8.seq  
AHR\_Modern.seq  
AHR\_Neanderthal.seq  
AHR\_201\_Hum\_ENST00000242057.8\_CDS.seq  
AHR\_Modern\_Hubbard.seq  
AHR\_Neanderthal\_Hubbard.seq

```
2460      2470      2480      2490      2500
AGTCCTTGGCTCTGAACTCAAGCTGTATGGTACAGGAACACCTACATCTA 2500
AGTCCTTGGCTCTGAACTCAAGCTGTATGGTACAGGAACACCTACATCTA 2500
AGTCCTTGGCTCTGAACTCAAGCTGTATGGTACAGGAACACCTACATCTA 2500
AGTCCTTGGCTCTGAACTCAAGCTGTATGGTACAGGAACACCTACATCTA 1857
AGAGCCTGGCTCTGAACAGCAGCTGCATGGTGCAGGAACACCTGCACCTG 1857
AGAGCCTGGCTCTGAACAGCAGCTGCATGGTGCAGGAACACCTGCACCTG 1857
```

AHR\_201\_Hum\_ENST00000242057.8.seq  
AHR\_Modern.seq  
AHR\_Neanderthal.seq  
AHR\_201\_Hum\_ENST00000242057.8\_CDS.seq  
AHR\_Modern\_Hubbard.seq  
AHR\_Neanderthal\_Hubbard.seq

```
2510      2520      2530      2540      2550
GAACAGCAACAGCAACATCACCAAAAGCAAGTAGTAGTGGAGCCACAGCA 2550
GAACAGCAACAGCAACATCACCAAAAGCAAGTAGTAGTGGAGCCACAGCA 2550
GAACAGCAACAGCAACATCACCAAAAGCAAGTAGTAGTGGAGCCACAGCA 2550
GAACAGCAACAGCAACATCACCAAAAGCAAGTAGTAGTGGAGCCACAGCA 1907
GAACAGCAACAGCAACATCACCAAAAGCAAGTAGTAGTGGAGCCACAGCA 1907
GAACAGCAACAGCAACATCACCAAAAGCAAGTAGTAGTGGAGCCACAGCA 1907
```

AHR\_201\_Hum\_ENST00000242057.8.seq  
AHR\_Modern.seq  
AHR\_Neanderthal.seq  
AHR\_201\_Hum\_ENST00000242057.8\_CDS.seq  
AHR\_Modern\_Hubbard.seq  
AHR\_Neanderthal\_Hubbard.seq

```
2560      2570      2580      2590      2600
ACAGCTGTGT CAGAAGAT GAAGCACAT GCAAGTTAAT GGCATGTTTGAAA 1957
GCAGCTGTGC CAGAAGAT GAAGCACAT GCAAGTTAAT GGCATGTTTGAAA 1957
GCAGCTGTGC CAGAAGAT GAAGCACAT GCAAGTTAAT GGCATGTTTGAAA 1957
```

AHR\_201\_Hum\_ENST00000242057.8.seq  
AHR\_Modern.seq  
AHR\_Neanderthal.seq  
AHR\_201\_Hum\_ENST00000242057.8\_CDS.seq  
AHR\_Modern\_Hubbard.seq  
AHR\_Neanderthal\_Hubbard.seq

```
2610      2620      2630      2640      2650
ATTGGAACCTA ACCAATTTCGTGCCTTTCAATTGTCCACAGCAAGACCCA 2650
ATTGGAACCTA ACCAATTTCGTGCCTTTCAATTGTCCACAGCAAGACCCA 2650
ATTGGAACCTA ACCAATTTCGTGCCTTTCAATTGTCCACAGCAAGACCCA 2650
ATTGGAACCTA ACCAATTTCGTGCCTTTCAATTGTCCACAGCAAGACCCA 2007
ACTGGAACAGCAACCAATTTCGTGCCCTTCAACTGCCCCAGCAGGACCCC 2007
ACTGGAACAGCAACCAATTTCGTGCCCTTCAACTGCCCCAGCAGGACCCC 2007
```

AHR\_201\_Hum\_ENST00000242057.8.seq  
AHR\_Modern.seq  
AHR\_Neanderthal.seq  
AHR\_201\_Hum\_ENST00000242057.8\_CDS.seq  
AHR\_Modern\_Hubbard.seq  
AHR\_Neanderthal\_Hubbard.seq

```
2660      2670      2680      2690      2700
CAACAATATAATGTCTTTACAGACTTACATGGGATCAGTCAAGAGTTCCC 2700
CAACAATATAATGTCTTTACAGACTTACATGGGATCAGTCAAGAGTTCCC 2700
CAACAATATAATGTCTTTACAGACTTACATGGGATCAGTCAAGAGTTCCC 2700
CAACAATATAATGTCTTTACAGACTTACATGGGATCAGTCAAGAGTTCCC 2057
CAGCAGTAAACAGTGTTCACCGATCTGCACGGGATCAGGCAGGAGTTCCC 2057
CAGCAGTAAACAGTGTTCACCGATCTGCACGGGATCAGGCAGGAGTTCCC 2057
```

AHR\_201\_Hum\_ENST00000242057.8.seq  
AHR\_Modern.seq  
AHR\_Neanderthal.seq  
AHR\_201\_Hum\_ENST00000242057.8\_CDS.seq  
AHR\_Modern\_Hubbard.seq  
AHR\_Neanderthal\_Hubbard.seq

```
2710      2720      2730      2740      2750
CTACAAATCTGAAATGGATTCTATGCCTTATACACAGAACTTTATTTCT 2750
CTACAAATCTGAAATGGATTCTATGCCTTATACACAGAACTTTATTTCT 2750
CTACAAATCTGAAATGGATTCTATGCCTTATACACAGAACTTTATTTCT 2750
CTACAAATCTGAAATGGATTCTATGCCTTATACACAGAACTTTATTTCT 2107
CTACAAAGGCGAAATGGATAGCATGCCCTACACCCAGAACTTTCATCAGCT 2107
CTACAAAGGCGAAATGGATAGCATGCCCTACACCCAGAACTTTCATCAGCT 2107
```

AHR\_201\_Hum\_ENST00000242057.8.seq  
AHR\_Modern.seq  
AHR\_Neanderthal.seq  
AHR\_201\_Hum\_ENST00000242057.8\_CDS.seq  
AHR\_Modern\_Hubbard.seq  
AHR\_Neanderthal\_Hubbard.seq

```
2760      2770      2780      2790      2800
GTAATCAGCCTGTATTACCACAACATTCCAATGTACAGAGCTGGACTAC 2800
GTAATCAGCCTGTATTACCACAACATTCCAATGTACAGAGCTGGACTAC 2800
GTAATCAGCCTGTATTACCACAACATTCCAATGTACAGAGCTGGACTAC 2800
GTAATCAGCCTGTATTACCACAACATTCCAATGTACAGAGCTGGACTAC 2157
GCAACAGCCCGTGTGCCCAACAGCAAGCAAATGACCGAGCTGGATTAC 2157
GCAACAGCCCGTGTGCCCAACAGCAAGCAAATGACCGAGCTGGATTAC 2157
```

AHR\_201\_Hum\_ENST00000242057.8.seq  
AHR\_Modern.seq  
AHR\_Neanderthal.seq  
AHR\_201\_Hum\_ENST00000242057.8\_CDS.seq  
AHR\_Modern\_Hubbard.seq  
AHR\_Neanderthal\_Hubbard.seq

```
2810      2820      2830      2840      2850
CCTATGGGGAGTTTTGAACCATCCCCATACCCCACTACTTCTAGTTTGA 2850
CCTATGGGGAGTTTTGAACCATCCCCATACCCCACTACTTCTAGTTTGA 2850
CCTATGGGGAGTTTTGAACCATCCCCATACCCCACTACTTCTAGTTTGA 2850
CCTATGGGGAGTTTTGAACCATCCCCATACCCCACTACTTCTAGTTTGA 2207
CCATGGGAGCTTGGAAACCCAGCCCCCTACCCCACTACTTCTAGTTTGA 2207
CCATGGGAGCTTGGAAACCCAGCCCCCTACCCCACTACTTCTAGTTTGA 2207
```

AHR\_201\_Hum\_ENST00000242057.8.seq  
AHR\_Modern.seq  
AHR\_Neanderthal.seq  
AHR\_201\_Hum\_ENST00000242057.8\_CDS.seq  
AHR\_Modern\_Hubbard.seq  
AHR\_Neanderthal\_Hubbard.seq

```
2860      2870      2880      2890      2900
AGATTTTGTCACTTGTTTACAACCTTCTGAAAACCAAAAGCATGGATTAA 2900
AGATTTTGTCACTTGTTTACAACCTTCTGAAAACCAAAAGCATGGATTAA 2900
AGATTTTGTCACTTGTTTACAACCTTCTGAAAACCAAAAGCATGGATTAA 2900
AGATTTTGTCACTTGTTTACAACCTTCTGAAAACCAAAAGCATGGATTAA 2257
AGATTTTGTCACTTGTTTACAACCTTCTGAAAACCAAAAGCATGGATTAA 2257
AGATTTTGTCACTTGTTTACAACCTTCTGAAAACCAAAAGCATGGATTAA 2257
```

AHR\_201\_Hum\_ENST00000242057.8.seq  
AHR\_Modern.seq  
AHR\_Neanderthal.seq  
AHR\_201\_Hum\_ENST00000242057.8\_CDS.seq  
AHR\_Modern\_Hubbard.seq  
AHR\_Neanderthal\_Hubbard.seq

```
2910      2920      2930      2940      2950
ATCCACAGTCAGCCATAATAACTCCTCAGACATGTTATGCTGGGGCCGTG 2950
ATCCACAGTCAGCCATAATAACTCCTCAGACATGTTATGCTGGGGCCGTG 2950
ATCCACAGTCAGCCATAATAACTCCTCAGACATGTTATGCTGGGGCCGTG 2950
ATCCACAGTCAGCCATAATAACTCCTCAGACATGTTATGCTGGGGCCGTG 2307
ATCCACAGTCAGCCATAATAACTCCTCAGACATGTTATGCTGGGGCCGTG 2307
ATCCACAGTCAGCCATAATAACTCCTCAGACATGTTATGCTGGGGCCGTG 2307
```

AHR\_201\_Hum\_ENST00000242057.8.seq  
AHR\_Modern.seq  
AHR\_Neanderthal.seq  
AHR\_201\_Hum\_ENST00000242057.8\_CDS.seq  
AHR\_Modern\_Hubbard.seq  
AHR\_Neanderthal\_Hubbard.seq

```
2960      2970      2980      2990      3000
TCGATGTATCAGTGCCAGCCAGAACCTCAGCACACCCACGTGGGTGAGAT 3000
TCGATGTATCAGTGCCAGCCAGAACCTCAGCACACCCACGTGGGTGAGAT 3000
TCGATGTATCAGTGCCAGCCAGAACCTCAGCACACCCACGTGGGTGAGAT 3000
TCGATGTATCAGTGCCAGCCAGAACCTCAGCACACCCACGTGGGTGAGAT 2357
AGCATGTATCAGTGCCAGCCAGAACCTCAGCACACCCACGTGGGTGAGAT 2357
AGCATGTATCAGTGCCAGCCAGAACCTCAGCACACCCACGTGGGTGAGAT 2357
```

AHR\_201\_Hum\_ENST00000242057.8.seq  
AHR\_Modern.seq  
AHR\_Neanderthal.seq  
AHR\_201\_Hum\_ENST00000242057.8\_CDS.seq  
AHR\_Modern\_Hubbard.seq  
AHR\_Neanderthal\_Hubbard.seq

```
3010      3020      3030      3040      3050
GCAGTACAATCCAGTACTGCCAGGCCAACAGGCATTTTTAAACAAGTTTC 3050
GCAGTACAATCCAGTACTGCCAGGCCAACAGGCATTTTTAAACAAGTTTC 3050
GCAGTACAATCCAGTACTGCCAGGCCAACAGGCATTTTTAAACAAGTTTC 3050
GCAGTACAATCCAGTACTGCCAGGCCAACAGGCATTTTTAAACAAGTTTC 2407
GCAGTACAATCCAGTACTGCCAGGCCAACAGGCATTTTTAAACAAGTTTC 2407
GCAGTACAATCCAGTACTGCCAGGCCAACAGGCATTTTTAAACAAGTTTC 2407
```

AHR\_201\_Hum\_ENST00000242057.8.seq  
AHR\_Modern.seq  
AHR\_Neanderthal.seq  
AHR\_201\_Hum\_ENST00000242057.8\_CDS.seq  
AHR\_Modern\_Hubbard.seq  
AHR\_Neanderthal\_Hubbard.seq

```
3060      3070      3080      3090      3100
AGAATGGAGTTTTAAATGAAACATATCCAGCTGAATTAATAACATAAAT 3100
AGAATGGAGTTTTAAATGAAACATATCCAGCTGAATTAATAACATAAAT 3100
AGAATGGAGTTTTAAATGAAACATATCCAGCTGAATTAATAACATAAAT 3100
AGAATGGAGTTTTAAATGAAACATATCCAGCTGAATTAATAACATAAAT 2457
AGAATGGAGTTTTAAATGAAACATATCCAGCTGAATTAATAACATAAAT 2457
AGAATGGAGTTTTAAATGAAACATATCCAGCTGAATTAATAACATAAAT 2457
```

AHR\_201\_Hum\_ENST00000242057.8.seq  
AHR\_Modern.seq  
AHR\_Neanderthal.seq  
AHR\_201\_Hum\_ENST00000242057.8\_CDS.seq  
AHR\_Modern\_Hubbard.seq  
AHR\_Neanderthal\_Hubbard.seq

```
3110      3120      3130      3140      3150
AACACTCAGACTACCACACATCTTCAGCCACTTCATCATCCGTGAGAAGC 3150
AACACTCAGACTACCACACATCTTCAGCCACTTCATCATCCGTGAGAAGC 3150
AACACTCAGACTACCACACATCTTCAGCCACTTCATCATCCGTGAGAAGC 3150
AACACTCAGACTACCACACATCTTCAGCCACTTCATCATCCGTGAGAAGC 2507
AACACTCAGACTACCACACATCTTCAGCCACTTCATCATCCGTGAGAAGC 2507
AACACTCAGACTACCACACATCTTCAGCCACTTCATCATCCGTGAGAAGC 2507
```

AHR\_201\_Hum\_ENST00000242057.8.seq  
AHR\_Modern.seq  
AHR\_Neanderthal.seq  
AHR\_201\_Hum\_ENST00000242057.8\_CDS.seq  
AHR\_Modern\_Hubbard.seq  
AHR\_Neanderthal\_Hubbard.seq

```
3160      3170      3180      3190      3200
CAGACCTTTTCTGATTTGACATCCAGTGGATTCTGTAAATTCGAAGCCC 3200
CAGACCTTTTCTGATTTGACATCCAGTGGATTCTGTAAATTCGAAGCCC 3200
CAGACCTTTTCTGATTTGACATCCAGTGGATTCTGTAAATTCGAAGCCC 3200
CAGACCTTTTCTGATTTGACATCCAGTGGATTCTGTAAATTCGAAGCCC 2547
CAGACCTTTTCTGATTTGACATCCAGTGGATTCTGTAAATTCGAAGCCC 2547
CAGACCTTTTCTGATTTGACATCCAGTGGATTCTGTAAATTCGAAGCCC 2547
```

AHR\_201\_Hum\_ENST00000242057.8.seq  
AHR\_Modern.seq  
AHR\_Neanderthal.seq  
AHR\_201\_Hum\_ENST00000242057.8\_CDS.seq  
AHR\_Modern\_Hubbard.seq  
AHR\_Neanderthal\_Hubbard.seq

```
3210      3220      3230      3240      3250
AATTTTGACCTGGTTTTGGATTAAATTAGTTTGTGAAGGATTATGGAA 3250
AATTTTGACCTGGTTTTGGATTAAATTAGTTTGTGAAGGATTATGGAA 3250
AATTTTGACCTGGTTTTGGATTAAATTAGTTTGTGAAGGATTATGGAA 3250
AATTTTGACCTGGTTTTGGATTAAATTAGTTTGTGAAGGATTATGGAA 2547
AATTTTGACCTGGTTTTGGATTAAATTAGTTTGTGAAGGATTATGGAA 2547
AATTTTGACCTGGTTTTGGATTAAATTAGTTTGTGAAGGATTATGGAA 2547
```

AHR\_201\_Hum\_ENST00000242057.8.seq  
AHR\_Modern.seq  
AHR\_Neanderthal.seq  
AHR\_201\_Hum\_ENST00000242057.8\_CDS.seq  
AHR\_Modern\_Hubbard.seq  
AHR\_Neanderthal\_Hubbard.seq

```
3260      3270      3280      3290      3300
AAATAAACTGTCACTGTTGGACGTGAGCAAGTTCACATGGAGGCATTGA 3300
AAATAAACTGTCACTGTTGGACGTGAGCAAGTTCACATGGAGGCATTGA 3300
AAATAAACTGTCACTGTTGGACGTGAGCAAGTTCACATGGAGGCATTGA 3300
AAATAAACTGTCACTGTTGGACGTGAGCAAGTTCACATGGAGGCATTGA 2547
AAATAAACTGTCACTGTTGGACGTGAGCAAGTTCACATGGAGGCATTGA 2547
AAATAAACTGTCACTGTTGGACGTGAGCAAGTTCACATGGAGGCATTGA 2547
```

AHR\_201\_Hum\_ENST00000242057.8.seq  
AHR\_Modern.seq  
AHR\_Neanderthal.seq  
AHR\_201\_Hum\_ENST00000242057.8\_CDS.seq  
AHR\_Modern\_Hubbard.seq  
AHR\_Neanderthal\_Hubbard.seq

```
3310      3320      3330      3340      3350
TGCATGCTATTACAATTATTCCAAACCAAAATTTAATTTTGTCTTTTAG 3350
TGCATGCTATTACAATTATTCCAAACCAAAATTTAATTTTGTCTTTTAG 3350
TGCATGCTATTACAATTATTCCAAACCAAAATTTAATTTTGTCTTTTAG 3350
TGCATGCTATTACAATTATTCCAAACCAAAATTTAATTTTGTCTTTTAG 2547
TGCATGCTATTACAATTATTCCAAACCAAAATTTAATTTTGTCTTTTAG 2547
TGCATGCTATTACAATTATTCCAAACCAAAATTTAATTTTGTCTTTTAG 2547
```

AHR\_201\_Hum\_ENST00000242057.8.seq  
AHR\_Modern.seq  
AHR\_Neanderthal.seq  
AHR\_201\_Hum\_ENST00000242057.8\_CDS.seq  
AHR\_Modern\_Hubbard.seq  
AHR\_Neanderthal\_Hubbard.seq

```
3360      3370      3380      3390      3400
AAAAGGGAGTTTAAAAATGGTATCAAAATTACATATACTACAGTCAAGAT 3400
AAAAGGGAGTTTAAAAATGGTATCAAAATTACATATACTACAGTCAAGAT 3400
AAAAGGGAGTTTAAAAATGGTATCAAAATTACATATACTACAGTCAAGAT 3400
AAAAGGGAGTTTAAAAATGGTATCAAAATTACATATACTACAGTCAAGAT 2547
AAAAGGGAGTTTAAAAATGGTATCAAAATTACATATACTACAGTCAAGAT 2547
AAAAGGGAGTTTAAAAATGGTATCAAAATTACATATACTACAGTCAAGAT 2547
```

AHR\_201\_Hum\_ENST00000242057.8.seq  
AHR\_Modern.seq  
AHR\_Neanderthal.seq  
AHR\_201\_Hum\_ENST00000242057.8\_CDS.seq  
AHR\_Modern\_Hubbard.seq  
AHR\_Neanderthal\_Hubbard.seq

```
3410      3420      3430      3440      3450
AGAAAGGGTGTGCCACGGAGTGGTGAAGTACCGTCTACATTTACATTA 3450
AGAAAGGGTGTGCCACGGAGTGGTGAAGTACCGTCTACATTTACATTA 3450
AGAAAGGGTGTGCCACGGAGTGGTGAAGTACCGTCTACATTTACATTA 3450
AGAAAGGGTGTGCCACGGAGTGGTGAAGTACCGTCTACATTTACATTA 2547
AGAAAGGGTGTGCCACGGAGTGGTGAAGTACCGTCTACATTTACATTA 2547
AGAAAGGGTGTGCCACGGAGTGGTGAAGTACCGTCTACATTTACATTA 2547
```

AHR\_201\_Hum\_ENST00000242057.8.seq  
AHR\_Modern.seq  
AHR\_Neanderthal.seq  
AHR\_201\_Hum\_ENST00000242057.8\_CDS.seq  
AHR\_Modern\_Hubbard.seq  
AHR\_Neanderthal\_Hubbard.seq

```

      3460      3470      3480      3490      3500
TTCTGGGCACCACAAAATATACAAAACCTTTATCAGGGAACTAAGATTCT 3500
TTCTGGGCACCACAAAATATACAAAACCTTTATCAGGGAACTAAGATTCT 3500
TTCTGGGCACCACAAAATATACAAAACCTTTATCAGGGAACTAAGATTCT 3500

```

AHR\_201\_Hum\_ENST00000242057.8.seq  
AHR\_Modern.seq  
AHR\_Neanderthal.seq  
AHR\_201\_Hum\_ENST00000242057.8\_CDS.seq  
AHR\_Modern\_Hubbard.seq  
AHR\_Neanderthal\_Hubbard.seq

```

      3510      3520      3530      3540      3550
TTTAAATTAGAAAATATTCTCTATTTGAATTATTTCTGTCACAGTAAAAA 3550
TTTAAATTAGAAAATATTCTCTATTTGAATTATTTCTGTCACAGTAAAAA 3550
TTTAAATTAGAAAATATTCTCTATTTGAATTATTTCTGTCACAGTAAAAA 3550

```

AHR\_201\_Hum\_ENST00000242057.8.seq  
AHR\_Modern.seq  
AHR\_Neanderthal.seq  
AHR\_201\_Hum\_ENST00000242057.8\_CDS.seq  
AHR\_Modern\_Hubbard.seq  
AHR\_Neanderthal\_Hubbard.seq

```

      3560      3570      3580      3590      3600
TAAATACTTTGAGTTTTGAGCTACTGGATTCTTATTAGTTCCTCAAAATA 3600
TAAATACTTTGAGTTTTGAGCTACTGGATTCTTATTAGTTCCTCAAAATA 3600
TAAATACTTTGAGTTTTGAGCTACTGGATTCTTATTAGTTCCTCAAAATA 3600

```

AHR\_201\_Hum\_ENST00000242057.8.seq  
AHR\_Modern.seq  
AHR\_Neanderthal.seq  
AHR\_201\_Hum\_ENST00000242057.8\_CDS.seq  
AHR\_Modern\_Hubbard.seq  
AHR\_Neanderthal\_Hubbard.seq

```

      3610      3620      3630      3640      3650
CAAAGTTAGAGAACTAACTAGTTTTCTATCATGTTAACCTCTGCTTT 3650
CAAAGTTAGAGAACTAACTAGTTTTCTATCATGTTAACCTCTGCTTT 3650
CAAAGTTAGAGAACTAACTAGTTTTCTATCATGTTAACCTCTGCTTT 3650

```

AHR\_201\_Hum\_ENST00000242057.8.seq  
AHR\_Modern.seq  
AHR\_Neanderthal.seq  
AHR\_201\_Hum\_ENST00000242057.8\_CDS.seq  
AHR\_Modern\_Hubbard.seq  
AHR\_Neanderthal\_Hubbard.seq

```

      3660      3670      3680      3690      3700
TATCTCAGATGTTAAATAAATGGTTTGGTGCTTTTATAAAAAGATAAT 3700
TATCTCAGATGTTAAATAAATGGTTTGGTGCTTTTATAAAAAGATAAT 3700
TATCTCAGATGTTAAATAAATGGTTTGGTGCTTTTATAAAAAGATAAT 3700

```

AHR\_201\_Hum\_ENST00000242057.8.seq  
AHR\_Modern.seq  
AHR\_Neanderthal.seq  
AHR\_201\_Hum\_ENST00000242057.8\_CDS.seq  
AHR\_Modern\_Hubbard.seq  
AHR\_Neanderthal\_Hubbard.seq

```

      3710      3720      3730      3740      3750
CTCAGTGCTTTCCTCCTTCACTGTTTCATCTAAGTGCCTCACATTTTTT 3750
CTCAGTGCTTTCCTCCTTCACTGTTTCATCTAAGTGCCTCACATTTTTT 3750
CTCAGTGCTTTCCTCCTTCACTGTTTCATCTAAGTGCCTCACATTTTTT 3750

```

AHR\_201\_Hum\_ENST00000242057.8.seq  
AHR\_Modern.seq  
AHR\_Neanderthal.seq  
AHR\_201\_Hum\_ENST00000242057.8\_CDS.seq  
AHR\_Modern\_Hubbard.seq  
AHR\_Neanderthal\_Hubbard.seq

```

      3760      3770      3780      3790      3800
CTACCTATAACACTCTAGGATGTATATTTTATATAAAGTATTCTTTTTCT 3800
CTACCTATAACACTCTAGGATGTATATTTTATATAAAGTATTCTTTTTCT 3800
CTACCTATAACACTCTAGGATGTATATTTTATATAAAGTATTCTTTTTCT 3800

```

AHR\_201\_Hum\_ENST00000242057.8.seq  
AHR\_Modern.seq  
AHR\_Neanderthal.seq  
AHR\_201\_Hum\_ENST00000242057.8\_CDS.seq  
AHR\_Modern\_Hubbard.seq  
AHR\_Neanderthal\_Hubbard.seq

```

      3810      3820      3830      3840      3850
TTTTTAAATTAATATCTTTCTGCACACAAATATTATTTGTGTTTCCTAAA 3850
TTTTTAAATTAATATCTTTCTGCACACAAATATTATTTGTGTTTCCTAAA 3850
TTTTTAAATTAATATCTTTCTGCACACAAATATTATTTGTGTTTCCTAAA 3850

```

AHR\_201\_Hum\_ENST00000242057.8.seq  
AHR\_Modern.seq  
AHR\_Neanderthal.seq  
AHR\_201\_Hum\_ENST00000242057.8\_CDS.seq  
AHR\_Modern\_Hubbard.seq  
AHR\_Neanderthal\_Hubbard.seq

```

      3860      3870      3880      3890      3900
TCCAACCATTTTCATTAATTCAAGGCATATTTAACTCCACTGCTTACCTA 3900
TCCAACCATTTTCATTAATTCAAGGCATATTTAACTCCACTGCTTACCTA 3900
TCCAACCATTTTCATTAATTCAAGGCATATTTAACTCCACTGCTTACCTA 3900

```

AHR\_201\_Hum\_ENST00000242057.8.seq  
AHR\_Modern.seq  
AHR\_Neanderthal.seq  
AHR\_201\_Hum\_ENST00000242057.8\_CDS.seq  
AHR\_Modern\_Hubbard.seq  
AHR\_Neanderthal\_Hubbard.seq

```
          3910      3920      3930      3940      3950
CTTTCCTTCAGGTAAGGGCAAATAATGATCGAAAAAATAATTATTTATTA 3950
CTTTCCTTCAGGTAAGGGCAAATAATGATCGAAAAAATAATTATTTATTA 3950
CTTTCCTTCAGGTAAGGGCAAATAATGATCGAAAAAATAATTATTTATTA 3950
                                     2547
                                     2547
                                     2547
```

AHR\_201\_Hum\_ENST00000242057.8.seq  
AHR\_Modern.seq  
AHR\_Neanderthal.seq  
AHR\_201\_Hum\_ENST00000242057.8\_CDS.seq  
AHR\_Modern\_Hubbard.seq  
AHR\_Neanderthal\_Hubbard.seq

```
          3960      3970      3980      3990      4000
CATAATTTAGTTGTTTCTAGACTATAAATGTTGCTATGTGCCTTATGTTG 4000
CATAATTTAGTTGTTTCTAGACTATAAATGTTGCTATGTGCCTTATGTTG 4000
CATAATTTAGTTGTTTCTAGACTATAAATGTTGCTATGTGCCTTATGTTG 4000
                                     2547
                                     2547
                                     2547
```

AHR\_201\_Hum\_ENST00000242057.8.seq  
AHR\_Modern.seq  
AHR\_Neanderthal.seq  
AHR\_201\_Hum\_ENST00000242057.8\_CDS.seq  
AHR\_Modern\_Hubbard.seq  
AHR\_Neanderthal\_Hubbard.seq

```
          4010      4020      4030      4040      4050
AAAAAATTTAAAGTAAAATGTCTTCCAAATTATTTCTTAATTATTATA 4050
AAAAAATTTAAAGTAAAATGTCTTCCAAATTATTTCTTAATTATTATA 4050
AAAAAATTTAAAGTAAAATGTCTTCCAAATTATTTCTTAATTATTATA 4050
                                     2547
                                     2547
                                     2547
```

AHR\_201\_Hum\_ENST00000242057.8.seq  
AHR\_Modern.seq  
AHR\_Neanderthal.seq  
AHR\_201\_Hum\_ENST00000242057.8\_CDS.seq  
AHR\_Modern\_Hubbard.seq  
AHR\_Neanderthal\_Hubbard.seq

```
          4060      4070      4080      4090      4100
AAAATATTAAGACAATAGCACTTAAATTCCTCAACAGTGTTTTCAGAAGA 4100
AAAATATTAAGACAATAGCACTTAAATTCCTCAACAGTGTTTTCAGAAGA 4100
AAAATATTAAGACAATAGCACTTAAATTCCTCAACAGTGTTTTCAGAAGA 4100
                                     2547
                                     2547
                                     2547
```

AHR\_201\_Hum\_ENST00000242057.8.seq  
AHR\_Modern.seq  
AHR\_Neanderthal.seq  
AHR\_201\_Hum\_ENST00000242057.8\_CDS.seq  
AHR\_Modern\_Hubbard.seq  
AHR\_Neanderthal\_Hubbard.seq

```
          4110      4120      4130      4140      4150
AATAAATATACCACTCTTTACCTTTATTGATATCTCCATGATGATAGTTG 4150
AATAAATATACCACTCTTTACCTTTATTGATATCTCCATGATGATAGTTG 4150
AATAAATATACCACTCTTTACCTTTATTGATATCTCCATGATGATAGTTG 4150
                                     2547
                                     2547
                                     2547
```

AHR\_201\_Hum\_ENST00000242057.8.seq  
AHR\_Modern.seq  
AHR\_Neanderthal.seq  
AHR\_201\_Hum\_ENST00000242057.8\_CDS.seq  
AHR\_Modern\_Hubbard.seq  
AHR\_Neanderthal\_Hubbard.seq

```
          4160      4170      4180      4190      4200
AATGTTGCAATGTGAAAAATCTGCTGTTAACTGCAACCTTGTTTATTAAA 4200
AATGTTGCAATGTGAAAAATCTGCTGTTAACTGCAACCTTGTTTATTAAA 4200
AATGTTGCAATGTGAAAAATCTGCTGTTAACTGCAACCTTGTTTATTAAA 4200
                                     2547
                                     2547
                                     2547
```

AHR\_201\_Hum\_ENST00000242057.8.seq  
AHR\_Modern.seq  
AHR\_Neanderthal.seq  
AHR\_201\_Hum\_ENST00000242057.8\_CDS.seq  
AHR\_Modern\_Hubbard.seq  
AHR\_Neanderthal\_Hubbard.seq

```
          4210      4220      4230      4240      4250
TTGCAAGAAGCTTTATTTCTAGCTTTTTAATTAAGCAAAGCACCCATTTT 4250
TTGCAAGAAGCTTTATTTCTAGCTTTTTAATTAAGCAAAGCACCCATTTT 4250
TTGCAAGAAGCTTTATTTCTAGCTTTTTAATTAAGCAAAGCACCCATTTT 4250
                                     2547
                                     2547
                                     2547
```

AHR\_201\_Hum\_ENST00000242057.8.seq  
AHR\_Modern.seq  
AHR\_Neanderthal.seq  
AHR\_201\_Hum\_ENST00000242057.8\_CDS.seq  
AHR\_Modern\_Hubbard.seq  
AHR\_Neanderthal\_Hubbard.seq

```
          4260      4270      4280      4290      4300
AATGTGTATAAATTGTCTTTAAAAACTGTTTACCTATATCCTTGAT 4300
AATGTGTATAAATTGTCTTTAAAAACTGTTTACCTATATCCTTGAT 4300
AATGTGTATAAATTGTCTTTAAAAACTGTTTACCTATATCCTTGAT 4300
                                     2547
                                     2547
                                     2547
```

AHR\_201\_Hum\_ENST00000242057.8.seq  
AHR\_Modern.seq  
AHR\_Neanderthal.seq  
AHR\_201\_Hum\_ENST00000242057.8\_CDS.seq  
AHR\_Modern\_Hubbard.seq  
AHR\_Neanderthal\_Hubbard.seq

```
          4310      4320      4330      4340      4350
AATATATTGTGTTGACTTTTATAAATTCGCTTCTTAGAACAGTGGAAACT 4350
AATATATTGTGTTGACTTTTATAAATTCGCTTCTTAGAACAGTGGAAACT 4350
AATATATTGTGTTGACTTTTATAAATTCGCTTCTTAGAACAGTGGAAACT 4350
                                     2547
                                     2547
                                     2547
```

AHR\_201\_Hum\_ENST00000242057.8.seq  
AHR\_Modern.seq  
AHR\_Neanderthal.seq  
AHR\_201\_Hum\_ENST00000242057.8\_CDS.seq  
AHR\_Modern\_Hubbard.seq  
AHR\_Neanderthal\_Hubbard.seq

```

      4360      4370      4380      4390      4400
ATGTGTTTTCTCATATTTGAGGAGTGTAAAGATTGCAGATAGCAAGGTT 4400
ATGTGTTTTCTCATATTTGAGGAGTGTAAAGATTGCAGATAGCAAGGTT 4400
ATGTGTTTTCTCATATTTGAGGAGTGTAAAGATTGCAGATAGCAAGGTT 4400
                                     2547
                                     2547
                                     2547
```

AHR\_201\_Hum\_ENST00000242057.8.seq  
AHR\_Modern.seq  
AHR\_Neanderthal.seq  
AHR\_201\_Hum\_ENST00000242057.8\_CDS.seq  
AHR\_Modern\_Hubbard.seq  
AHR\_Neanderthal\_Hubbard.seq

```

      4410      4420      4430      4440      4450
TGGTGCAAAGTATTGTAAAGAGTGAATTGAATGGTGCATTGTATAGATAT 4450
TGGTGCAAAGTATTGTAAAGAGTGAATTGAATGGTGCATTGTATAGATAT 4450
TGGTGCAAAGTATTGTAAAGAGTGAATTGAATGGTGCATTGTATAGATAT 4450
                                     2547
                                     2547
                                     2547
```

AHR\_201\_Hum\_ENST00000242057.8.seq  
AHR\_Modern.seq  
AHR\_Neanderthal.seq  
AHR\_201\_Hum\_ENST00000242057.8\_CDS.seq  
AHR\_Modern\_Hubbard.seq  
AHR\_Neanderthal\_Hubbard.seq

```

      4460      4470      4480      4490      4500
AATGAACAAATTATTTGTAAGATATTTGCAGTTTTTCATTTTAAAAAGT 4500
AATGAACAAATTATTTGTAAGATATTTGCAGTTTTTCATTTTAAAAAGT 4500
AATGAACAAATTATTTGTAAGATATTTGCAGTTTTTCATTTTAAAAAGT 4500
                                     2547
                                     2547
                                     2547
```

AHR\_201\_Hum\_ENST00000242057.8.seq  
AHR\_Modern.seq  
AHR\_Neanderthal.seq  
AHR\_201\_Hum\_ENST00000242057.8\_CDS.seq  
AHR\_Modern\_Hubbard.seq  
AHR\_Neanderthal\_Hubbard.seq

```

      4510      4520      4530      4540      4550
CCATACCTTATATATGCACTTAATTTGTTGGGGCTTTACATACTTTATCA 4550
CCATACCTTATATATGCACTTAATTTGTTGGGGCTTTACATACTTTATCA 4550
CCATACCTTATATATGCACTTAATTTGTTGGGGCTTTACATACTTTATCA 4550
                                     2547
                                     2547
                                     2547
```

AHR\_201\_Hum\_ENST00000242057.8.seq  
AHR\_Modern.seq  
AHR\_Neanderthal.seq  
AHR\_201\_Hum\_ENST00000242057.8\_CDS.seq  
AHR\_Modern\_Hubbard.seq  
AHR\_Neanderthal\_Hubbard.seq

```

      4560      4570      4580      4590      4600
ATGTGTCCTTCTAAGAAATCAAGTAATGAATCCAAGTCTTAAAGTTGGT 4600
ATGTGTCCTTCTAAGAAATCAAGTAATGAATCCAAGTCTTAAAGTTGGT 4600
ATGTGTCCTTCTAAGAAATCAAGTAATGAATCCAAGTCTTAAAGTTGGT 4600
                                     2547
                                     2547
                                     2547
```

AHR\_201\_Hum\_ENST00000242057.8.seq  
AHR\_Modern.seq  
AHR\_Neanderthal.seq  
AHR\_201\_Hum\_ENST00000242057.8\_CDS.seq  
AHR\_Modern\_Hubbard.seq  
AHR\_Neanderthal\_Hubbard.seq

```

      4610      4620      4630      4640      4650
ATTAATAAAAAAGACAACCATAGTTCGTTTACCTTCAAACCTTATAGTTT 4650
ATTAATAAAAAAGACAACCATAGTTCGTTTACCTTCAAACCTTATAGTTT 4650
ATTAATAAAAAAGACAACCATAGTTCGTTTACCTTCAAACCTTATAGTTT 4650
                                     2547
                                     2547
                                     2547
```

AHR\_201\_Hum\_ENST00000242057.8.seq  
AHR\_Modern.seq  
AHR\_Neanderthal.seq  
AHR\_201\_Hum\_ENST00000242057.8\_CDS.seq  
AHR\_Modern\_Hubbard.seq  
AHR\_Neanderthal\_Hubbard.seq

```

      4660      4670      4680      4690      4700
TTTTAATGATATACTGATCTTCATTACCAATAGGCAAATTAATCACCTTA 4700
TTTTAATGATATACTGATCTTCATTACCAATAGGCAAATTAATCACCTTA 4700
TTTTAATGATATACTGATCTTCATTACCAATAGGCAAATTAATCACCTTA 4700
                                     2547
                                     2547
                                     2547
```

AHR\_201\_Hum\_ENST00000242057.8.seq  
AHR\_Modern.seq  
AHR\_Neanderthal.seq  
AHR\_201\_Hum\_ENST00000242057.8\_CDS.seq  
AHR\_Modern\_Hubbard.seq  
AHR\_Neanderthal\_Hubbard.seq

```

      4710      4720      4730      4740      4750
CCAACCTTACTGTCCTAACATGGTTTAAAAGAAAAAATGACACCATCTTT 4750
CCAACCTTACTGTCCTAACATGGTTTAAAAGAAAAAATGACACCATCTTT 4750
CCAACCTTACTGTCCTAACATGGTTTAAAAGAAAAAATGACACCATCTTT 4750
                                     2547
                                     2547
                                     2547
```

AHR\_201\_Hum\_ENST00000242057.8.seq  
AHR\_Modern.seq  
AHR\_Neanderthal.seq  
AHR\_201\_Hum\_ENST00000242057.8\_CDS.seq  
AHR\_Modern\_Hubbard.seq  
AHR\_Neanderthal\_Hubbard.seq

```

      4760      4770      4780      4790      4800
TATTCCTTTTTTTTTTTTTTTTGGAGAGAGAGTCTTACTCTGCCGCCCAA 4800
TATTCCTTTTTTTTTTTTTTTTGGAGAGAGAGTCTTACTCTGCCGCCCAA 4800
TATTCCTTTTTTTTTTTTTTTTGGAGAGAGAGTCTTACTCTGCCGCCCAA 4800
                                     2547
                                     2547
                                     2547
```

AHR\_201\_Hum\_ENST00000242057.8.seq  
AHR\_Modern.seq  
AHR\_Neanderthal.seq  
AHR\_201\_Hum\_ENST00000242057.8\_CDS.seq  
AHR\_Modern\_Hubbard.seq  
AHR\_Neanderthal\_Hubbard.seq

```

      4810      4820      4830      4840      4850
ACTGGAGTGCAGTGGCACAATCTTGGCTCACTGCAACCTCTACCTCCTGG 4850
ACTGGAGTGCAGTGGCACAATCTTGGCTCACTGCAACCTCTACCTCCTGG 4850
ACTGGAGTGCAGTGGCACAATCTTGGCTCACTGCAACCTCTACCTCCTGG 4850
2547
2547
2547
```

AHR\_201\_Hum\_ENST00000242057.8.seq  
AHR\_Modern.seq  
AHR\_Neanderthal.seq  
AHR\_201\_Hum\_ENST00000242057.8\_CDS.seq  
AHR\_Modern\_Hubbard.seq  
AHR\_Neanderthal\_Hubbard.seq

```

      4860      4870      4880      4890      4900
GTTCAAGTGATTCTCTTGCCTCAGCCTCCCGAGTTGCTGGGATTACAGGC 4900
GTTCAAGTGATTCTCTTGCCTCAGCCTCCCGAGTTGCTGGGATTACAGGC 4900
GTTCAAGTGATTCTCTTGCCTCAGCCTCCCGAGTTGCTGGGATTACAGGC 4900
2547
2547
2547
```

AHR\_201\_Hum\_ENST00000242057.8.seq  
AHR\_Modern.seq  
AHR\_Neanderthal.seq  
AHR\_201\_Hum\_ENST00000242057.8\_CDS.seq  
AHR\_Modern\_Hubbard.seq  
AHR\_Neanderthal\_Hubbard.seq

```

      4910      4920      4930      4940      4950
ATGTGCCACCATGCCAGCTAATTTTTGTATTTTGTAGTAAACGGGTTT 4950
ATGTGCCACCATGCCAGCTAATTTTTGTATTTTGTAGTAAACGGGTTT 4950
ATGTGCCACCATGCCAGCTAATTTTTGTATTTTGTAGTAAACGGGTTT 4950
2547
2547
2547
```

AHR\_201\_Hum\_ENST00000242057.8.seq  
AHR\_Modern.seq  
AHR\_Neanderthal.seq  
AHR\_201\_Hum\_ENST00000242057.8\_CDS.seq  
AHR\_Modern\_Hubbard.seq  
AHR\_Neanderthal\_Hubbard.seq

```

      4960      4970      4980      4990      5000
CACCATGTTGGCCAGACTGGTCTCAAACCTCCTGACCTCAGGTGAGCCTCC 5000
CACCATGTTGGCCAGACTGGTCTCAAACCTCCTGACCTCAGGTGAGCCTCC 5000
CACCATGTTGGCCAGACTGGTCTCAAACCTCCTGACCTCAGGTGAGCCTCC 5000
2547
2547
2547
```

AHR\_201\_Hum\_ENST00000242057.8.seq  
AHR\_Modern.seq  
AHR\_Neanderthal.seq  
AHR\_201\_Hum\_ENST00000242057.8\_CDS.seq  
AHR\_Modern\_Hubbard.seq  
AHR\_Neanderthal\_Hubbard.seq

```

      5010      5020      5030      5040      5050
CACCTTGGCCTCCCAAAGTGCTGGGATTACAGGCGTGAGCCACTGCATTC 5050
CACCTTGGCCTCCCAAAGTGCTGGGATTACAGGCGTGAGCCACTGCATTC 5050
CACCTTGGCCTCCCAAAGTGCTGGGATTACAGGCGTGAGCCACTGCATTC 5050
2547
2547
2547
```

AHR\_201\_Hum\_ENST00000242057.8.seq  
AHR\_Modern.seq  
AHR\_Neanderthal.seq  
AHR\_201\_Hum\_ENST00000242057.8\_CDS.seq  
AHR\_Modern\_Hubbard.seq  
AHR\_Neanderthal\_Hubbard.seq

```

      5060      5070      5080      5090      5100
AGCTCTTCTTTTCTTTAGATATGAGAGCTGAAGAGCTTAGACACATTTTG 5100
AGCTCTTCTTTTCTTTAGATATGAGAGCTGAAGAGCTTAGACACATTTTG 5100
AGCTCTTCTTTTCTTTAGATATGAGAGCTGAAGAGCTTAGACACATTTTG 5100
2547
2547
2547
```

AHR\_201\_Hum\_ENST00000242057.8.seq  
AHR\_Modern.seq  
AHR\_Neanderthal.seq  
AHR\_201\_Hum\_ENST00000242057.8\_CDS.seq  
AHR\_Modern\_Hubbard.seq  
AHR\_Neanderthal\_Hubbard.seq

```

      5110      5120      5130      5140      5150
CATGTATTATTTGAAATCTGATGGAATCCCAAACCTGAGATGTATTAATA 5150
CATGTATTATTTGAAATCTGATGGAATCCCAAACCTGAGATGTATTAATA 5150
CATGTATTATTTGAAATCTGATGGAATCCCAAACCTGAGATGTATTAATA 5150
2547
2547
2547
```

AHR\_201\_Hum\_ENST00000242057.8.seq  
AHR\_Modern.seq  
AHR\_Neanderthal.seq  
AHR\_201\_Hum\_ENST00000242057.8\_CDS.seq  
AHR\_Modern\_Hubbard.seq  
AHR\_Neanderthal\_Hubbard.seq

```

      5160      5170      5180      5190      5200
TACAATTTTGGCCGGGTGCAGTGGCTCAGCCTGTAAATCCCAGCACTTG 5200
TACAATTTTGGCCGGGTGCAGTGGCTCAGCCTGTAAATCCCAGCACTTG 5200
TACAATTTTGGCCGGGTGCAGTGGCTCAGCCTGTAAATCCCAGCACTTG 5200
2547
2547
2547
```

AHR\_201\_Hum\_ENST00000242057.8.seq  
AHR\_Modern.seq  
AHR\_Neanderthal.seq  
AHR\_201\_Hum\_ENST00000242057.8\_CDS.seq  
AHR\_Modern\_Hubbard.seq  
AHR\_Neanderthal\_Hubbard.seq

```

      5210      5220      5230      5240      5250
GGGAGGGCGAGGAGGGTGGATCACGAGGTCAAGAGATGGAGACCATCCTG 5250
GGGAGGGCGAGGAGGGTGGATCACGAGGTCAAGAGATGGAGACCATCCTG 5250
GGGAGGGCGAGGAGGGTGGATCACGAGGTCAAGAGATGGAGACCATCCTG 5250
2547
2547
2547
```

AHR\_201\_Hum\_ENST00000242057.8.seq  
AHR\_Modern.seq  
AHR\_Neanderthal.seq  
AHR\_201\_Hum\_ENST00000242057.8\_CDS.seq  
AHR\_Modern\_Hubbard.seq  
AHR\_Neanderthal\_Hubbard.seq

```
5260      5270      5280      5290      5300
ACCAACATGGT GAAACCCCTGTCTCTACTAAAAATACAGAAATTAGCTGGG 5300
ACCAACATGGT GAAACCCCTGTCTCTACTAAAAATACAGAAATTAGCTGGG 5300
ACCAACATGGT GAAACCCCTGTCTCTACTAAAAATACAGAAATTAGCTGGG 5300
2547
2547
2547
```

AHR\_201\_Hum\_ENST00000242057.8.seq  
AHR\_Modern.seq  
AHR\_Neanderthal.seq  
AHR\_201\_Hum\_ENST00000242057.8\_CDS.seq  
AHR\_Modern\_Hubbard.seq  
AHR\_Neanderthal\_Hubbard.seq

```
5310      5320      5330      5340      5350
CATGGTGGCGT GAGCCTGTAGTCCTAGCTACTCAGGAGGCTGAGGCAGGA 5350
CATGGTGGCGT GAGCCTGTAGTCCTAGCTACTCAGGAGGCTGAGGCAGGA 5350
CATGGTGGCGT GAGCCTGTAGTCCTAGCTACTCAGGAGGCTGAGGCAGGA 5350
2547
2547
2547
```

AHR\_201\_Hum\_ENST00000242057.8.seq  
AHR\_Modern.seq  
AHR\_Neanderthal.seq  
AHR\_201\_Hum\_ENST00000242057.8\_CDS.seq  
AHR\_Modern\_Hubbard.seq  
AHR\_Neanderthal\_Hubbard.seq

```
5360      5370      5380      5390      5400
GAATAGCCTGAACCTGGGAATCGGAGGTTGCAGAGCCAAAGATCGCCCCAC 5400
GAATAGCCTGAACCTGGGAATCGGAGGTTGCAGAGCCAAAGATCGCCCCAC 5400
GAATAGCCTGAACCTGGGAATCGGAGGTTGCAGAGCCAAAGATCGCCCCAC 5400
2547
2547
2547
```

AHR\_201\_Hum\_ENST00000242057.8.seq  
AHR\_Modern.seq  
AHR\_Neanderthal.seq  
AHR\_201\_Hum\_ENST00000242057.8\_CDS.seq  
AHR\_Modern\_Hubbard.seq  
AHR\_Neanderthal\_Hubbard.seq

```
5410      5420      5430      5440      5450
TGCACTCCAGCCTGGCAATAGACCGAGACTCCGTCTCCAAAAAAAAAAAAA 5450
TGCACTCCAGCCTGGCAATAGACCGAGACTCCGTCTCCAAAAAAAAAAAAA 5450
TGCACTCCAGCCTGGCAATAGACCGAGACTCCGTCTCCAAAAAAAAAAAAA 5450
2547
2547
2547
```

AHR\_201\_Hum\_ENST00000242057.8.seq  
AHR\_Modern.seq  
AHR\_Neanderthal.seq  
AHR\_201\_Hum\_ENST00000242057.8\_CDS.seq  
AHR\_Modern\_Hubbard.seq  
AHR\_Neanderthal\_Hubbard.seq

```
5460      5470      5480      5490      5500
AATACAATTTTATTTCTTTACTTTTTTTAGTAAGTTAATGTATATAAA 5500
AATACAATTTTATTTCTTTACTTTTTTTAGTAAGTTAATGTATATAAA 5500
AATACAATTTTATTTCTTTACTTTTTTTAGTAAGTTAATGTATATAAA 5500
2547
2547
2547
```

AHR\_201\_Hum\_ENST00000242057.8.seq  
AHR\_Modern.seq  
AHR\_Neanderthal.seq  
AHR\_201\_Hum\_ENST00000242057.8\_CDS.seq  
AHR\_Modern\_Hubbard.seq  
AHR\_Neanderthal\_Hubbard.seq

```
5510      5520      5530      5540      5550
AATGGCTTCGGACAAAATATCTCTGAGTTCGTGTATTTTCAGTCAAAAC 5550
AATGGCTTCGGACAAAATATCTCTGAGTTCGTGTATTTTCAGTCAAAAC 5550
AATGGCTTCGGACAAAATATCTCTGAGTTCGTGTATTTTCAGTCAAAAC 5550
2547
2547
2547
```

AHR\_201\_Hum\_ENST00000242057.8.seq  
AHR\_Modern.seq  
AHR\_Neanderthal.seq  
AHR\_201\_Hum\_ENST00000242057.8\_CDS.seq  
AHR\_Modern\_Hubbard.seq  
AHR\_Neanderthal\_Hubbard.seq

```
5560      5570      5580      5590      5600
TTTAAACCTGTAGAATCAATTTAAGTGTTGGAAAAAATTTGTCTGAAACA 5600
TTTAAACCTGTAGAATCAATTTAAGTGTTGGAAAAAATTTGTCTGAAACA 5600
TTTAAACCTGTAGAATCAATTTAAGTGTTGGAAAAAATTTGTCTGAAACA 5600
2547
2547
2547
```

AHR\_201\_Hum\_ENST00000242057.8.seq  
AHR\_Modern.seq  
AHR\_Neanderthal.seq  
AHR\_201\_Hum\_ENST00000242057.8\_CDS.seq  
AHR\_Modern\_Hubbard.seq  
AHR\_Neanderthal\_Hubbard.seq

```
5610      5620      5630      5640      5650
TTTCATAATTTGTTTCCAGCATGAGGTATCTAAGGATTTAGACCAGAGGT 5650
TTTCATAATTTGTTTCCAGCATGAGGTATCTAAGGATTTAGACCAGAGGT 5650
TTTCATAATTTGTTTCCAGCATGAGGTATCTAAGGATTTAGACCAGAGGT 5650
2547
2547
2547
```

AHR\_201\_Hum\_ENST00000242057.8.seq  
AHR\_Modern.seq  
AHR\_Neanderthal.seq  
AHR\_201\_Hum\_ENST00000242057.8\_CDS.seq  
AHR\_Modern\_Hubbard.seq  
AHR\_Neanderthal\_Hubbard.seq

```
5660      5670      5680      5690      5700
CTAGATTAATACTCTATTTTTACATTTAAACCTTTTATTATAAGTCTTAC 5700
CTAGATTAATACTCTATTTTTACATTTAAACCTTTTATTATAAGTCTTAC 5700
CTAGATTAATACTCTATTTTTACATTTAAACCTTTTATTATAAGTCTTAC 5700
2547
2547
2547
```

AHR\_201\_Hum\_ENST00000242057.8.seq  
AHR\_Modern.seq  
AHR\_Neanderthal.seq  
AHR\_201\_Hum\_ENST00000242057.8\_CDS.seq  
AHR\_Modern\_Hubbard.seq  
AHR\_Neanderthal\_Hubbard.seq

```
5710      5720      5730      5740      5750
ATAAACCATTTTGTACTCTCTCCACATGTTACTGGATAAATTGTTTA 5750
ATAAACCATTTTGTACTCTCTCCACATGTTACTGGATAAATTGTTTA 5750
ATAAACCATTTTGTACTCTCTCCACATGTTACTGGATAAATTGTTTA 5750
2547
2547
2547
```

AHR\_201\_Hum\_ENST00000242057.8.seq  
AHR\_Modern.seq  
AHR\_Neanderthal.seq  
AHR\_201\_Hum\_ENST00000242057.8\_CDS.seq  
AHR\_Modern\_Hubbard.seq  
AHR\_Neanderthal\_Hubbard.seq

```
5760      5770      5780      5790      5800
GTGGAAAATAGGCTTTTAAATCATGAATATGATGACAATCAGTTATACAG 5800
GTGGAAAATAGGCTTTTAAATCATGAATATGATGACAATCAGTTATACAG 5800
GTGGAAAATAGGCTTTTAAATCATGAATATGATGACAATCAGTTATACAG 5800
2547
2547
2547
```

AHR\_201\_Hum\_ENST00000242057.8.seq  
AHR\_Modern.seq  
AHR\_Neanderthal.seq  
AHR\_201\_Hum\_ENST00000242057.8\_CDS.seq  
AHR\_Modern\_Hubbard.seq  
AHR\_Neanderthal\_Hubbard.seq

```
5810      5820      5830      5840      5850
TTATAAAATTTAAAGTTTGAAAAGCAATATTGTATATTTTATCTATATA 5850
TTATAAAATTTAAAGTTTGAAAAGCAATATTGTATATTTTATCTATATA 5850
TTATAAAATTTAAAGTTTGAAAAGCAATATTGTATATTTTATCTATATA 5850
2547
2547
2547
```

AHR\_201\_Hum\_ENST00000242057.8.seq  
AHR\_Modern.seq  
AHR\_Neanderthal.seq  
AHR\_201\_Hum\_ENST00000242057.8\_CDS.seq  
AHR\_Modern\_Hubbard.seq  
AHR\_Neanderthal\_Hubbard.seq

```
5860      5870      5880      5890      5900
AAATAACTAAATGTATCTAAGAATAATAAAATCACGTTAAACCAAATAC 5900
AAATAACTAAATGTATCTAAGAATAATAAAATCACGTTAAACCAAATAC 5900
AAATAACTAAATGTATCTAAGAATAATAAAATCACGTTAAACCAAATAC 5900
2547
2547
2547
```

AHR\_201\_Hum\_ENST00000242057.8.seq  
AHR\_Modern.seq  
AHR\_Neanderthal.seq  
AHR\_201\_Hum\_ENST00000242057.8\_CDS.seq  
AHR\_Modern\_Hubbard.seq  
AHR\_Neanderthal\_Hubbard.seq

```
5910      5920      5930      5940      5950
ACGTTTGTCTGTATTGTTAAGTGCCAAACAAAGGATACTTAGTGCACTGC 5950
ACGTTTGTCTGTATTGTTAAGTGCCAAACAAAGGATACTTAGTGCACTGC 5950
ACGTTTGTCTGTATTGTTAAGTGCCAAACAAAGGATACTTAGTGCACTGC 5950
2547
2547
2547
```

AHR\_201\_Hum\_ENST00000242057.8.seq  
AHR\_Modern.seq  
AHR\_Neanderthal.seq  
AHR\_201\_Hum\_ENST00000242057.8\_CDS.seq  
AHR\_Modern\_Hubbard.seq  
AHR\_Neanderthal\_Hubbard.seq

```
5960      5970      5980      5990      6000
TACATTGTGGGATTTATTTCTAGATGATGTGCACATCTAAGGATATGGAT 6000
TACATTGTGGGATTTATTTCTAGATGATGTGCACATCTAAGGATATGGAT 6000
TACATTGTGGGATTTATTTCTAGATGATGTGCACATCTAAGGATATGGAT 6000
2547
2547
2547
```

AHR\_201\_Hum\_ENST00000242057.8.seq  
AHR\_Modern.seq  
AHR\_Neanderthal.seq  
AHR\_201\_Hum\_ENST00000242057.8\_CDS.seq  
AHR\_Modern\_Hubbard.seq  
AHR\_Neanderthal\_Hubbard.seq

```
6010      6020      6030      6040      6050
GTGTCTAATTTAGTCTTTTCCTGTACCAGGTTTTCTTACAATACCTGAA 6050
GTGTCTAATTTAGTCTTTTCCTGTACCAGGTTTTCTTACAATACCTGAA 6050
GTGTCTAATTTAGTCTTTTCCTGTACCAGGTTTTCTTACAATACCTGAA 6050
2547
2547
2547
```

AHR\_201\_Hum\_ENST00000242057.8.seq  
AHR\_Modern.seq  
AHR\_Neanderthal.seq  
AHR\_201\_Hum\_ENST00000242057.8\_CDS.seq  
AHR\_Modern\_Hubbard.seq  
AHR\_Neanderthal\_Hubbard.seq

```
6060      6070      6080      6090      6100
GACTTACCAGTATTCTAGTGTATTATGAAGCTTTCAACATTACTATGCAC 6100
GACTTACCAGTATTCTAGTGTATTATGAAGCTTTCAACATTACTATGCAC 6100
GACTTACCAGTATTCTAGTGTATTATGAAGCTTTCAACATTACTATGCAC 6100
2547
2547
2547
```

AHR\_201\_Hum\_ENST00000242057.8.seq  
AHR\_Modern.seq  
AHR\_Neanderthal.seq  
AHR\_201\_Hum\_ENST00000242057.8\_CDS.seq  
AHR\_Modern\_Hubbard.seq  
AHR\_Neanderthal\_Hubbard.seq

```
6110      6120      6130      6140      6150
AAACTAGTGTTTTTCGATGTTACTAAATTTTAGGTAATGCTTTTCATGGC 6150
AAACTAGTGTTTTTCGATGTTACTAAATTTTAGGTAATGCTTTTCATGGC 6150
AAACTAGTGTTTTTCGATGTTACTAAATTTTAGGTAATGCTTTTCATGGC 6150
2547
2547
2547
```

AHR\_201\_Hum\_ENST00000242057.8.seq  
AHR\_Modern.seq  
AHR\_Neanderthal.seq  
AHR\_201\_Hum\_ENST00000242057.8\_CDS.seq  
AHR\_Modern\_Hubbard.seq  
AHR\_Neanderthal\_Hubbard.seq

|                                       | 6160                                             | 6170 | 6180 | 6190 | 6200 |      |
|---------------------------------------|--------------------------------------------------|------|------|------|------|------|
| AHR_201_Hum_ENST00000242057.8.seq     | TTTTTCTTCAAAATGTTACTGCTTACATATATCATGCATAGATTTTGC |      |      |      |      | 6200 |
| AHR_Modern.seq                        | TTTTTCTTCAAAATGTTACTGCTTACATATATCATGCATAGATTTTGC |      |      |      |      | 6200 |
| AHR_Neanderthal.seq                   | TTTTTCTTCAAAATGTTACTGCTTACATATATCATGCATAGATTTTGC |      |      |      |      | 6200 |
| AHR_201_Hum_ENST00000242057.8_CDS.seq |                                                  |      |      |      |      | 2547 |
| AHR_Modern_Hubbard.seq                |                                                  |      |      |      |      | 2547 |
| AHR_Neanderthal_Hubbard.seq           |                                                  |      |      |      |      | 2547 |

AHR\_201\_Hum\_ENST00000242057.8.seq  
AHR\_Modern.seq  
AHR\_Neanderthal.seq  
AHR\_201\_Hum\_ENST00000242057.8\_CDS.seq  
AHR\_Modern\_Hubbard.seq  
AHR\_Neanderthal\_Hubbard.seq

|                                       | 6210                                               | 6220 | 6230 | 6240 | 6250 |      |
|---------------------------------------|----------------------------------------------------|------|------|------|------|------|
| AHR_201_Hum_ENST00000242057.8.seq     | TTAAAGTATGATTTATAATATCCTCATTATCAAAGTTGTATACAATAATA |      |      |      |      | 6250 |
| AHR_Modern.seq                        | TTAAAGTATGATTTATAATATCCTCATTATCAAAGTTGTATACAATAATA |      |      |      |      | 6250 |
| AHR_Neanderthal.seq                   | TTAAAGTATGATTTATAATATCCTCATTATCAAAGTTGTATACAATAATA |      |      |      |      | 6250 |
| AHR_201_Hum_ENST00000242057.8_CDS.seq |                                                    |      |      |      |      | 2547 |
| AHR_Modern_Hubbard.seq                |                                                    |      |      |      |      | 2547 |
| AHR_Neanderthal_Hubbard.seq           |                                                    |      |      |      |      | 2547 |

AHR\_201\_Hum\_ENST00000242057.8.seq  
AHR\_Modern.seq  
AHR\_Neanderthal.seq  
AHR\_201\_Hum\_ENST00000242057.8\_CDS.seq  
AHR\_Modern\_Hubbard.seq  
AHR\_Neanderthal\_Hubbard.seq

|                                       | 6260                       | 6270 |      |
|---------------------------------------|----------------------------|------|------|
| AHR_201_Hum_ENST00000242057.8.seq     | TATAATAAAATAACAAATATGAATAA |      | 6276 |
| AHR_Modern.seq                        | TATAATAAAATAACAAATATGAATAA |      | 6277 |
| AHR_Neanderthal.seq                   | TATAATAAAATAACAAATATGAATAA |      | 6277 |
| AHR_201_Hum_ENST00000242057.8_CDS.seq |                            |      | 2547 |
| AHR_Modern_Hubbard.seq                |                            |      | 2547 |
| AHR_Neanderthal_Hubbard.seq           |                            |      | 2547 |
