# Supplementary material for: Evolution of Hominin Detoxification: Neanderthal and Modern Human Ah Receptor Respond Similarly to TCDD
Source: Oxford University Press journal article supplement (doi:10.1093/molbev/msaa287), 2020-11-04
Supplement: msaa287_supplementary_data.zip [file msaa287_supplementary_data.zip › SI2_ModernHuman_AHR_cDNA.txt]

>AHR_ModernHumanRef.seq
GCGGCCGCttcgatAGATCTattacaCTGCAGattcagccggtgcgcgcggcggcgggaggcagtggctggggagtcccg
tcgacgctctgttccgagagcgtgccccggaccgccagctcagaacaggggcagccgtgtagccgaacggaagctgggag
cagccgggactggtggcccgcgcccgagctccgcaggcgggaagcaccctggatttaggaagtcccgggagcagcgcggc
ggcacctccctcacccaaggggccgcggcgacggtcacggggcgcggcgccaccgtgagcgacccaggccaggattctaa
atagacggcccaggctcctcctccgcccgggccgcctcacctgcgggcattgccgcgccgcctccgccggtgtagacggc
acctgcgccgccttgctcgcgggtctccgcccctcgcccaccctcactgcgccaggcccaggcagctcacctgtactggc
gcgggctgcggaagcctgcgtgagccgaggcgttgaggcgcggcgcccacgccactgtcccgagaggacgcaggtggagc
gggcgcggcttcgcggaacccggcgccggccgccgcagtggtcccagcctacaccgggttccggggacccggccgccagt
gcccggggagtagccgccgccgtcggctgggcaccATGAACAGCAGCAGCGCCAACATCACCTACGCCAGTCGCAAGCGG
CGGAAGCCGGTGCAGAAAACAGTAAAGCCAATCCCAGCTGAAGGAATCAAGTCAAATCCTTCCAAGCGGCATAGAGACCG
ACTTAATACAGAGTTGGACCGTTTGGCTAGCCTGCTGCCTTTCCCACAAGATGTTATTAATAAGTTGGACAAACTTTCAG
TTCTTAGGCTCAGCGTCAGTTACCTGAGAGCCAAGAGCTTCTTTGATGTTGCATTAAAATCCTCCCCTACTGAAAGAAAC
GGAGGCCAGGATAACTGTAGAGCAGCAAATTTCAGAGAAGGCCTGAACTTACAAGAAGGAGAATTCTTATTACAGGCTCT
GAATGGCTTTGTATTAGTTGTCACTACAGATGCTTTGGTCTTTTATGCTTCTTCTACTATACAAGATTATCTAGGGTTTC
AGCAGTCTGATGTCATACATCAGAGTGTATATGAACTTATCCATACCGAAGACCGAGCTGAATTTCAGCGTCAGCTACAC
TGGGCATTAAATCCTTCTCAGTGTACAGAGTCTGGACAAGGAATTGAAGAAGCCACTGGTCTCCCCCAGACAGTAGTCTG
TTATAACCCAGACCAGATTCCTCCAGAAAACTCTCCTTTAATGGAGAGGTGCTTCATATGTCGTCTAAGGTGTCTGCTGG
ATAATTCATCTGGTTTTCTGGCAATGAATTTCCAAGGGAAGTTAAAGTATCTTCATGGACAGAAAAAGAAAGGGAAAGAT
GGATCAATACTTCCACCTCAGTTGGCTTTGTTTGCGATAGCTACTCCACTTCAGCCACCATCCATACTTGAAATCCGGAC
CAAAAATTTTATCTTTAGAACCAAACACAAACTAGACTTCACACCTATTGGTTGTGATGCCAAAGGAAGAATTGTTTTAG
GATATACTGAAGCAGAGCTGTGCACGAGAGGCTCAGGTTATCAGTTTATTCATGCAGCTGATATGCTTTATTGTGCCGAG
TCCCATATCCGAATGATTAAGACTGGAGAAAGTGGCATGATAGTTTTCCGGCTTCTTACAAAAAACAACCGATGGACTTG
GGTCCAGTCTAATGCACGCCTGCTTTATAAAAATGGAAGACCAGATTATATCATTGTAACTCAGAGACCACTAACAGATG
AGGAAGGAACAGAGCATTTACGAAAACGAAATACGAAGTTGCCTTTTATGTTTACCACTGGAGAAGCTGTGTTGTATGAG
GCAACCAACCCTTTTCCTGCCATAATGGATCCCTTACCACTAAGGACTAAAAATGGCACTAGTGGAAAAGACTCTGCTAC
CACATCCACTCTAAGCAAGGACTCTCTCAATCCTAGTTCCCTCCTGGCTGCCATGATGCAACAAGATGAGTCTATTTATC
TCTATCCTGCTTCAAGTACTTCAAGTACTGCACCTTTTGAAAACAACTTTTTCAACGAATCTATGAATGAATGCAGAAAT
TGGCAAGATAATACTGCACCGATGGGAAATGATACTATCCTGAAACATGAGCAAATTGACCAGCCTCAGGATGTGAACTC
ATTTGCTGGAGGTCACCCAGGGCTCTTTCAAGATAGTAAAAACAGTGACTTGTACAGCATAATGAAAAACCTAGGCATTG
ATTTTGAAGACATCAGACACATGCAGAATGAAAAATTTTTCAGAAATGATTTTTCTGGTGAGGTTGACTTCAGAGACATT
GACTTAACGGATGAAATCCTGACGTATGTCCAAGATTCTTTAAGTAAGTCTCCCTTCATACCTTCAGATTATCAACAGCA
ACAGTCCTTGGCTCTGAACTCAAGCTGTATGGTACAGGAACACCTACATCTAGAACAGCAACAGCAACATCACCAAAAGC
AAGTAGTAGTGGAGCCACAGCAACAGCTGTGTCAGAAGATGAAGCACATGCAAGTTAATGGCATGTTTGAAAATTGGAAC
TCTAACCAATTCGTGCCTTTCAATTGTCCACAGCAAGACCCACAACAATATAATGTCTTTACAGACTTACATGGGATCAG
TCAAGAGTTCCCCTACAAATCTGAAATGGATTCTATGCCTTATACACAGAACTTTATTTCCTGTAATCAGCCTGTATTAC
CACAACATTCCAAATGTACAGAGCTGGACTACCCTATGGGGAGTTTTGAACCATCCCCATACCCCACTACTTCTAGTTTA
GAAGATTTTGTCACTTGTTTACAACTTCCTGAAAACCAAAAGCATGGATTAAATCCACAGTCAGCCATAATAACTCCTCA
GACATGTTATGCTGGGGCCGTGTCGATGTATCAGTGCCAGCCAGAACCTCAGCACACCCACGTGGGTCAGATGCAGTACA
ATCCAGTACTGCCAGGCCAACAGGCATTTTTAAACAAGTTTCAGAATGGAGTTTTAAATGAAACATATCCAGCTGAATTA
AATAACATAAATAACACTCAGACTACCACACATCTTCAGCCACTTCATCATCCGTCAGAAGCCAGACCTTTTCCTGATTT
GACATCCAGTGGATTCCTGTAAttccaagcccaattttgaccctggtttttggattaaattagtttgtgaaggattatgg
aaaaataaaactgtcactgttggacgtcagcaagttcacatggaggcattgatgcatgctattcacaattattccaaacc
aaattttaatttttgcttttagaaaagggagtttaaaaatggtatcaaaattacatatactacagtcaagatagaaaggg
tgctgccacggagtggtgaggtaccgtctacatttcacattattctgggcaccacaaaatatacaaaactttatcaggga
aactaagattcttttaaattagaaaatattctctatttgaattatttctgtcacagtaaaaataaaatactttgagtttt
gagctactggattcttattagttccccaaatacaaagttagagaactaaactagtttttcctatcatgttaacctctgct
tttatctcagatgttaaaataaatggtttggtgctttttataaaaagataatctcagtgctttcctccttcactgtttca
tctaagtgcctcacatttttttctacctataacactctaggatgtatattttatataaagtattctttttcttttttaaa
ttaatatctttctgcacacaaatattatttgtgtttcctaaatccaaccattttcattaattcaggcatattttaactcc
actgcttacctactttcttcaggtaaagggcaaataatgatcgaaaaaataattatttattacataatttagttgtttct
agactataaatgttgctatgtgccttatgttgaaaaaatttaaaagtaaaatgtctttccaaattatttcttaattatta
taaaaatattaagacaatagcacttaaattcctcaacagtgttttcagaagaaataaatataccactctttacctttatt
gatatctccatgatgatagttgaatgttgcaatgtgaaaaatctgctgttaactgcaaccttgtttattaaattgcaaga
agctttatttctagctttttaattaagcaaagcacccatttcaatgtgtataaattgtctttaaaaactgttttagacct
ataatccttgataatatattgtgttgactttataaatttcgcttcttagaacagtggaaactatgtgtttttctcatatt
tgaggagtgttaagattgcagatagcaaggtttggtgcaaagtattgtaatgagtgaattgaatggtgcattgtatagat
ataatgaacaaaattatttgtaagatatttgcagtttttcattttaaaaagtccataccttatatatgcacttaatttgt
tggggctttacatactttatcaatgtgtctttctaagaaatcaagtaatgaatccaactgcttaaagttggtattaataa
aaagacaaccacatagttcgtttaccttcaaactttaggtttttttaatgatatactgatcttcattaccaataggcaaa
ttaatcaccctaccaactttactgtcctaacatggtttaaaagaaaaaatgacaccatcttttattcttttttttttttt
tttttgagagagagtcttactctgccgcccaaactggagtgcagtggcacaatcttggctcactgcaacctctacctcct
gggttcaagtgattctcttgcctcagcctcccgagttgctgggattacaggcatgtgccaccatgcccagctaatttttg
tatttttagtagaaacgggtttcaccatgttggccagactggtctcaaactcctgacctcaggtgagcctcccaccttgg
cctcccaaagtgctgggattacaggcgtgagccactgcattcagctcttcttttctttagatatgagagctgaagagctt
agacacattttgcatgtattatttgaaaatctgatggaatcccaaactgagatgtattaaaatacaatttttggccgggt
gcagtggctcacgcctgtaatcccagcacttggggagggcgaggagggtggatcacgaggtcaagagatggagaccatcc
tgaccaacatggtgaaaccctgtctctactaaaaatacagaaattagctgggcatggtggcgtgagcctgtagtcctagc
tactcaggaggctgaggcaggagaatagcctgaacctgggaatcggaggttgcagagccaagatcgccccactgcactcc
agcctggcaatagaccgagactccgtctccaaaaaaaaaaaaaatacaatttttatttcttttactttttttagtaagtt
aatgtatataaaaatggcttcggacaaaatatctctgagttctgtgtattttcagtcaaaactttaaacctgtagaatca
atttaagtgttggaaaaaatttgtctgaaacatttcataatttgtttccagcatgaggtatctaaggatttagaccagag
gtctagattaatactctatttttacatttaaaccttttattataagtcttacataaaccatttttgttactctcttccac
atgttactggataaattgtttagtggaaaataggctttttaatcatgaatatgatgacaatcagttatacagttataaaa
ttaaaagtttgaaaagcaatattgtatatttttatctatataaaataactaaaatgtatctaagaataataaaatcacgt
taaaccaaatacacgtttgtctgtattgttaagtgccaaacaaaggatacttagtgcactgctacattgtgggatttatt
tctagatgatgtgcacatctaaggatatggatgtgtctaatttagtcttttcctgtaccaggtttttcttacaatacctg
aagacttaccagtattctagtgtattatgaagctttcaacattactatgcacaaactagtgtttttcgatgttactaaat
tttaggtaaatgctttcatggcttttttcttcaaaatgttactgcttacatatatcatgcatagatttttgcttaaagta
tgatttataatatcctcattatcaaagttgtatacaataatatataataaaataacaaatatgaataatACTCGAGTtat
cctGGTACCcctgaaGCGGCCGC
