# Supplementary material for: Evolution of Hominin Detoxification: Neanderthal and Modern Human Ah Receptor Respond Similarly to TCDD
Source: Oxford University Press journal article supplement (doi:10.1093/molbev/msaa287), 2020-11-04
Supplement: msaa287_supplementary_data.zip [file msaa287_supplementary_data.zip › SI5_Mathematical_Modeling_Calculations.xlsx]

## Sheet: Sheet1
Supplementary Information SI5
Mathematical Modeling of the Effect of the Exogenous/Endogenous AHR and Ancient/Modern AHR EC50 ratios on the Dose-Response Relation for TCDD-Induced CYP1A1 mRNA Expression
Experimentally observed:
Table 1 from main text:
Best fit values as estimated by fitting the equation
Y = Bottom + [X * (Top-Bottom) / (EC50 + X)]
to the data using GraphPad Prism (see Materials and Methods, section Data Processing and Statistics in main text)
Note that all Table 1 values are based on data that were expressed as fold values as compared to the response of [AHR Modern human]-transfected unexposed cells (0 pM TCDD)
AHR variant	EC50	Basal	Maximal
	(pM)	CYP1A1/ACTB	CYP1A1/ACTB
Modern human	4097	1	5.103
Altai-Neanderthal	3450	1.126	5.526
Mathematical modeling:
Parameter definitions:
Parameter	Definition
Y	Relative CYP1A1 mRNA concentration expressed as fold value compared to [AHR Modern human]-transfected, 0 pM TCDD
X	Concentration TCDD in pM
Bottom	Basal relative CYP1A1 mRNA concentration expressed as fold value compared to [AHR Modern human]-transfected, 0 pM TCDD
Top	Maximal relative CYP1A1 mRNA concentration expressed as fold value compared to [AHR Modern Human]-transfected, 0 pM TCDD
EC50	Concentration in pM where 50% of the maximal response range (Top - Bottom) is reached
R	Endogenous / Total AHR ratio after transfection with a pcDNA3.1/Zeo(+)-AHR expression vector (Modern human or Neanderthal AHR)
F	EC50Neanderthal / EC50Modern human
Equation (binding isotherm) describing ligand binding to a receptor with 1 ligand-binding site, such as the AHR:
	Y = Bottom + [X * (Top-Bottom) / (EC50 + X)]
Mathematical model:
The mathematical model describing the total expected CYP1A1 induction level is assuming additivity of the contribution of the exogenous and endogenous AHR to the total induction response:
YTotal =	YEndogenous + YExogenous
YEndogenous = (BottomModern human * R) + [X * (TopModern human - BottomModern human) * R / (EC50Modern human + X)]
YExogenous, Modern human = [BottomModern human * (1 - R)] + [X * (TopModern human - BottomModern human) * (1 - R) / (EC50Modern human + X)]
YExogenous, Neanderthal = [BottomNeanderthal * (1 - R)] + [X * (TopNeanderthal - BottomNeanderthal) * (1 - R) / (EC50Neanderthal + X)] = [BottomNeanderthal * (1 - R)] + {X * (TopNeanderthal - BottomNeanderthal) * (1 - R) / [(F * EC50Modern human) + X]}
If transfected with a pcDNA3.1/Zeo(+)-Modern human AHR expression construct:					YTotal =	YEndogenous + YExogenous, Modern human	= {BottomModern human + [X * (TopModern human - BottomModern human) / (EC50Modern human + X)]} * [R + (1 - R)]
							= BottomModern human + [X * (TopModern human - BottomModern human) / (EC50Modern human + X)]
							Þ Irrespective of the value of R the dose response-curve predicted by the model for the Modern human AHR will always coincide with the observed dose-response curve (see block F55-H150)
If transfected with a pcDNA3.1/Zeo(+)-Neanderthal AHR expression construct:					YTotal =	YEndogenous + YExogenous, Neanderthal	= (BottomModern human * R) + [X * (TopModern human - BottomModern human) * R / (EC50Modern human + X)] + [BottomNeanderthal * (1 - R)] + {X * (TopNeanderthal - BottomNeanderthal) * (1 - R) / [(F * EC50Modern human) + X]}
The "Observed" dose-response curves were reproduced here by setting the one-site ligand binding equation parameters to the values actually measured as shown in Table 1 of the main text, which is reproduced above.
Transfected with expression construct for AHR of:				Modern human	Modern human	Modern human	Modern human	Neanderthal	Neanderthal	Neanderthal	Neanderthal	Neanderthal	Neanderthal	Neanderthal	Neanderthal	Neanderthal	Neanderthal	Neanderthal	Neanderthal	Neanderthal
R =				-	0.5	0.0588235	0.0070922	-	0.5	0.5	0.5	0.5	0.0588235	0.0588235	0.0588235	0.0588235	0.0070922	0.0070922	0.0070922	0.0070922
F =				-	-	-	-	-	1	0.1	0.01	0.001	1	0.1	0.01	0.001	1	0.1	0.01	0.001
Legend text				Modern human: Observed	Modern human: Predicted R=0.5	Modern human: Predicted R=1/17	Modern human: Predicted R=1/141	Neanderthal: Observed	Neanderthal: Predicted R=0.5 F=1	Neanderthal: Predicted R=0.5 F=1/10	Neanderthal: Predicted R=0.5 F=1/100	Neanderthal: Predicted R=0.5 F=1/1000	Neanderthal: Predicted R=1/17 F=1	Neanderthal: Predicted R=1/17 F=1/10	Neanderthal: Predicted R=1/17 F=1/100	Neanderthal: Predicted R=1/17 F=1/1000	Neanderthal: Predicted R=1/141 F=1	Neanderthal: Predicted R=1/141 F=1/10	Neanderthal: Predicted R=1/141 F=1/100	Neanderthal: Predicted R=1/141 F=1/1000
		Log X	X	Y	Y	Y	Y	Y	Y	Y	Y	Y	Y	Y	Y	Y	Y	Y	Y	Y
		-3	0.001	1	1	1	1	1.126	1.063	1.06301	1.06305	1.06354	1.11859	1.1186	1.11869	1.1196	1.12511	1.12512	1.12521	1.12617
		-2.9	0.00125893	1	1	1	1	1.126	1.063	1.06301	1.06307	1.06368	1.11859	1.1186	1.11872	1.11986	1.12511	1.12512	1.12524	1.12645
		-2.8	0.00158489	1	1	1	1	1.126	1.063	1.06301	1.06309	1.06385	1.11859	1.1186	1.11875	1.12019	1.12511	1.12512	1.12528	1.1268
		-2.7	0.00199526	1	1	1	1	1.126	1.063	1.06301	1.06311	1.06407	1.11859	1.11861	1.11879	1.1206	1.12511	1.12513	1.12532	1.12723
		-2.6	0.00251189	1	1	1	1	1.126	1.063	1.06301	1.06314	1.06435	1.11859	1.11861	1.11884	1.12113	1.12511	1.12513	1.12537	1.12778
		-2.5	0.00316228	1	1	1	1	1.126	1.063	1.06302	1.06317	1.0647	1.11859	1.11862	1.11891	1.12178	1.12511	1.12514	1.12544	1.12848
		-2.4	0.00398107	1	1	1	1	1.12601	1.063	1.06302	1.06322	1.06514	1.11859	1.11863	1.11899	1.12261	1.12511	1.12515	1.12553	1.12935
		-2.3	0.00501187	1.00001	1.00001	1.00001	1.00001	1.12601	1.06301	1.06303	1.06327	1.06569	1.11859	1.11864	1.1191	1.12365	1.12511	1.12516	1.12564	1.13044
		-2.2	0.00630957	1.00001	1.00001	1.00001	1.00001	1.12601	1.06301	1.06304	1.06334	1.06639	1.11859	1.11865	1.11923	1.12496	1.12511	1.12517	1.12578	1.13182
		-2.1	0.00794328	1.00001	1.00001	1.00001	1.00001	1.12601	1.06301	1.06305	1.06343	1.06726	1.1186	1.11867	1.11939	1.1266	1.12511	1.12519	1.12595	1.13356
		-2	0.01	1.00001	1.00001	1.00001	1.00001	1.12601	1.06301	1.06306	1.06354	1.06836	1.1186	1.11869	1.1196	1.12867	1.12512	1.12521	1.12617	1.13574
		-1.9	0.0125893	1.00001	1.00001	1.00001	1.00001	1.12602	1.06301	1.06307	1.06368	1.06975	1.1186	1.11872	1.11986	1.13127	1.12512	1.12524	1.12645	1.13849
		-1.8	0.0158489	1.00002	1.00002	1.00002	1.00002	1.12602	1.06302	1.06309	1.06386	1.07149	1.11861	1.11875	1.12019	1.13455	1.12512	1.12528	1.1268	1.14194
		-1.7	0.0199526	1.00002	1.00002	1.00002	1.00002	1.12603	1.06302	1.06312	1.06408	1.07367	1.11861	1.11879	1.12061	1.13866	1.12513	1.12532	1.12723	1.14628
		-1.6	0.0251189	1.00003	1.00003	1.00003	1.00003	1.12603	1.06303	1.06315	1.06436	1.07642	1.11862	1.11884	1.12113	1.14382	1.12513	1.12537	1.12778	1.15173
		-1.5	0.0316228	1.00003	1.00003	1.00003	1.00003	1.12604	1.06303	1.06319	1.06471	1.07987	1.11862	1.11891	1.12178	1.15031	1.12514	1.12544	1.12848	1.15857
		-1.4	0.0398107	1.00004	1.00004	1.00004	1.00004	1.12605	1.06304	1.06323	1.06516	1.08419	1.11863	1.11899	1.12261	1.15844	1.12515	1.12553	1.12935	1.16715
		-1.3	0.0501187	1.00005	1.00005	1.00005	1.00005	1.12606	1.06305	1.06329	1.06571	1.08961	1.11864	1.1191	1.12365	1.16864	1.12516	1.12564	1.13044	1.1779
		-1.2	0.0630957	1.00006	1.00006	1.00006	1.00006	1.12608	1.06307	1.06337	1.06641	1.0964	1.11866	1.11923	1.12496	1.1814	1.12517	1.12578	1.13182	1.19137
		-1.1	0.0794328	1.00008	1.00008	1.00008	1.00008	1.1261	1.06308	1.06347	1.0673	1.10488	1.11867	1.1194	1.12661	1.19736	1.12519	1.12595	1.13356	1.2082
		-1	0.1	1.0001	1.0001	1.0001	1.0001	1.12613	1.0631	1.06359	1.06841	1.11547	1.1187	1.1196	1.12868	1.21726	1.12521	1.12617	1.13574	1.2292
		-0.9	0.125893	1.00013	1.00013	1.00013	1.00013	1.12616	1.06313	1.06374	1.0698	1.12865	1.11872	1.11987	1.13128	1.24205	1.12524	1.12645	1.13849	1.25535
		-0.8	0.158489	1.00016	1.00016	1.00016	1.00016	1.1262	1.06316	1.06393	1.07156	1.14502	1.11876	1.1202	1.13456	1.27283	1.12528	1.1268	1.14194	1.28782
		-0.7	0.199526	1.0002	1.0002	1.0002	1.0002	1.12625	1.06321	1.06417	1.07376	1.16527	1.1188	1.12062	1.13867	1.31091	1.12532	1.12723	1.14628	1.32799
		-0.6	0.251189	1.00025	1.00025	1.00025	1.00025	1.12632	1.06326	1.06447	1.07653	1.19022	1.11886	1.12114	1.14384	1.35783	1.12538	1.12779	1.15173	1.37749
		-0.5	0.316228	1.00032	1.00032	1.00032	1.00032	1.1264	1.06333	1.06486	1.08001	1.2208	1.11893	1.1218	1.15033	1.41534	1.12545	1.12848	1.15857	1.43815
		-0.4	0.398107	1.0004	1.0004	1.0004	1.0004	1.12651	1.06341	1.06533	1.08437	1.25804	1.11901	1.12263	1.15846	1.48537	1.12553	1.12935	1.16715	1.51203
		-0.3	0.501187	1.0005	1.0005	1.0005	1.0005	1.12664	1.06352	1.06594	1.08984	1.30304	1.11912	1.12368	1.16866	1.56999	1.12564	1.13045	1.17791	1.60129
		-0.2	0.630957	1.00063	1.00063	1.00063	1.00063	1.1268	1.06365	1.0667	1.09668	1.35691	1.11926	1.12499	1.18143	1.67128	1.12578	1.13183	1.19137	1.70814
		-0.1	0.794328	1.0008	1.0008	1.0008	1.0008	1.12701	1.06382	1.06765	1.10524	1.42067	1.11944	1.12665	1.1974	1.79114	1.12596	1.13357	1.2082	1.83458
		0	1	1.001	1.001	1.001	1.001	1.12727	1.06404	1.06886	1.11592	1.49513	1.11966	1.12873	1.21732	1.93112	1.12618	1.13575	1.22921	1.98224
		0.1	1.25893	1.00126	1.00126	1.00126	1.00126	1.12761	1.06431	1.07037	1.12922	1.58075	1.11993	1.13135	1.24212	2.09206	1.12646	1.1385	1.25536	2.15201
		0.2	1.58489	1.00159	1.00159	1.00159	1.00159	1.12802	1.06464	1.07227	1.14573	1.67746	1.12028	1.13464	1.27291	2.27381	1.12681	1.14195	1.28783	2.34374
		0.3	1.99526	1.002	1.002	1.002	1.002	1.12854	1.06507	1.07466	1.16616	1.78452	1.12072	1.13878	1.31102	2.47497	1.12725	1.14629	1.328	2.55593
		0.4	2.51189	1.00251	1.00251	1.00251	1.00251	1.1292	1.06561	1.07766	1.19135	1.90043	1.12127	1.14397	1.35797	2.6927	1.1278	1.15175	1.3775	2.7856
		0.5	3.16228	1.00316	1.00316	1.00316	1.00316	1.13003	1.06628	1.08143	1.22222	2.02294	1.12197	1.15049	1.41551	2.92275	1.1285	1.15859	1.43817	3.02826
		0.6	3.98107	1.00398	1.00398	1.00398	1.00398	1.13107	1.06713	1.08616	1.25983	2.14921	1.12284	1.15868	1.48558	3.1597	1.12938	1.16718	1.51205	3.27818
		0.7	5.01187	1.00501	1.00501	1.00501	1.00501	1.13238	1.06819	1.09209	1.3053	2.27599	1.12394	1.16893	1.57026	3.39744	1.13048	1.17794	1.60133	3.52893
		0.8	6.30957	1.00631	1.00631	1.00631	1.00631	1.13403	1.06954	1.09952	1.35975	2.40003	1.12533	1.18177	1.67161	3.62978	1.13187	1.19141	1.70818	3.77398
		0.9	7.94328	1.00794	1.00794	1.00794	1.00794	1.13611	1.07123	1.10881	1.42424	2.51837	1.12707	1.19782	1.79156	3.8511	1.13362	1.20825	1.83463	4.00737
		1	10	1.00999	1.00999	1.00999	1.00999	1.13872	1.07335	1.12041	1.49962	2.62861	1.12926	1.21785	1.93165	4.05681	1.13581	1.22927	1.98231	4.22427
		1.1	12.5893	1.01257	1.01257	1.01257	1.01257	1.142	1.07602	1.13487	1.5864	2.72912	1.13201	1.24278	2.09272	4.24372	1.13858	1.25544	2.15209	4.42131
		1.2	15.8489	1.01581	1.01581	1.01581	1.01581	1.14612	1.07938	1.15284	1.68457	2.81901	1.13548	1.27375	2.27465	4.41008	1.14205	1.28793	2.34384	4.59664
		1.3	19.9526	1.01989	1.01989	1.01989	1.01989	1.1513	1.0836	1.17511	1.79346	2.89816	1.13983	1.31207	2.47602	4.55546	1.14642	1.32813	2.55606	4.74979
		1.4	25.1189	1.025	1.025	1.025	1.025	1.1578	1.08891	1.20259	1.91167	2.96699	1.14529	1.35929	2.69403	4.68051	1.15191	1.37766	2.78576	4.88143
		1.5	31.6228	1.03143	1.03143	1.03143	1.03143	1.16596	1.09556	1.23635	2.03707	3.02638	1.15216	1.41717	2.92441	4.78663	1.15879	1.43837	3.02846	4.99303
		1.6	39.8107	1.03949	1.03949	1.03949	1.03949	1.17619	1.10391	1.27758	2.16696	3.07746	1.16076	1.48767	3.16178	4.87568	1.16743	1.51231	3.27844	5.08653
		1.7	50.1187	1.04959	1.04959	1.04959	1.04959	1.189	1.11438	1.32759	2.29827	3.12154	1.17155	1.57288	3.40006	4.94974	1.17826	1.60164	3.52925	5.16411
		1.8	63.0957	1.06223	1.06223	1.06223	1.06223	1.20502	1.12748	1.38771	2.42799	3.15997	1.18506	1.6749	3.63307	5.01092	1.19181	1.70857	3.77438	5.22796
		1.9	79.4328	1.07804	1.07804	1.07804	1.07804	1.22503	1.14386	1.45929	2.55341	3.19411	1.20194	1.79569	3.85522	5.06124	1.20875	1.83513	4.00787	5.28017
		2	100	1.09776	1.09776	1.09776	1.09776	1.24994	1.1643	1.54351	2.6725	3.22529	1.22301	1.93681	4.06197	5.10253	1.22989	1.98293	4.22489	5.32265
		2.1	125.893	1.12232	1.12232	1.12232	1.12232	1.28091	1.18975	1.64128	2.78399	3.25482	1.24924	2.09918	4.25017	5.13644	1.25622	2.15287	4.42209	5.35707
		2.2	158.489	1.15281	1.15281	1.15281	1.15281	1.31925	1.22134	1.75307	2.88751	3.28397	1.28181	2.28271	4.41813	5.1644	1.2889	2.34481	4.59761	5.3849
		2.3	199.526	1.19054	1.19054	1.19054	1.19054	1.36656	1.26044	1.87879	2.98349	3.314	1.32211	2.48606	4.5655	5.18765	1.32934	2.55727	4.751	5.40735
		2.4	251.189	1.23702	1.23702	1.23702	1.23702	1.42461	1.3086	2.01768	3.073	3.34621	1.37176	2.7065	4.69298	5.20725	1.37917	2.78727	4.88294	5.42547
		2.5	316.228	1.294	1.294	1.294	1.294	1.49544	1.36764	2.16836	3.15766	3.38186	1.43262	2.93986	4.80207	5.22409	1.44024	3.03032	4.99489	5.44011
		2.6	398.107	1.36338	1.36338	1.36338	1.36338	1.5812	1.43953	2.3289	3.23941	3.42228	1.50673	3.18084	4.89473	5.23896	1.5146	3.28073	5.08883	5.45198
		2.7	501.187	1.44721	1.44721	1.44721	1.44721	1.68412	1.5264	2.49709	3.32036	3.46877	1.59627	3.42345	4.97313	5.25249	1.60446	3.53207	5.16693	5.46165
		2.8	630.957	1.54756	1.54756	1.54756	1.54756	1.80628	1.63037	2.67065	3.40264	3.52258	1.70345	3.66162	5.03947	5.26526	1.71202	3.77782	5.2314	5.4696
		2.9	794.328	1.66631	1.66631	1.66631	1.66631	1.94946	1.75342	2.84755	3.48825	3.58486	1.83029	3.88982	5.09584	5.27771	1.8393	4.01204	5.28434	5.47621
		3	1000	1.80498	1.80498	1.80498	1.80498	2.11476	1.89712	3.02611	3.57891	3.65652	1.97841	4.10357	5.14413	5.29022	1.98795	4.22991	5.32766	5.48178
		3.1	1258.93	1.96442	1.96442	1.96442	1.96442	2.30233	2.06233	3.20504	3.67587	3.73807	2.14871	4.29971	5.18597	5.30306	2.15884	4.42806	5.36305	5.48657
		3.2	1584.89	2.14448	2.14448	2.14448	2.14448	2.51104	2.2489	3.38335	3.7798	3.82957	2.34104	4.47647	5.22273	5.31641	2.35184	4.60464	5.39193	5.49075
		3.3	1995.26	2.34376	2.34376	2.34376	2.34376	2.73826	2.4554	3.5601	3.89062	3.93037	2.5539	4.63333	5.25549	5.33032	2.56545	4.75918	5.41553	5.49448
		3.4	2511.89	2.55946	2.55946	2.55946	2.55946	2.97983	2.6789	3.73422	4.00742	4.03915	2.78429	4.77077	5.28504	5.34475	2.79665	4.89232	5.43485	5.49785
		3.5	3162.28	2.78734	2.78734	2.78734	2.78734	3.23027	2.91503	3.90434	4.12853	4.15383	3.0277	4.88992	5.31194	5.35954	3.04091	5.00548	5.4507	5.50092
		3.6	3981.07	3.02206	3.02206	3.02206	3.02206	3.48323	3.15824	4.06875	4.25162	4.27177	3.27841	4.9923	5.33653	5.37445	3.2925	5.10059	5.46374	5.50375
		3.7	5011.87	3.25755	3.25755	3.25755	3.25755	3.73207	3.40226	4.22552	4.37394	4.38998	3.52994	5.07962	5.35898	5.38918	3.54491	5.17977	5.47449	5.50634
		3.8	6309.57	3.48768	3.48768	3.48768	3.48768	3.9706	3.64071	4.3727	4.49264	4.50541	3.77574	5.1536	5.37938	5.40341	3.79158	5.24516	5.48336	5.50871
		3.9	7943.28	3.70685	3.70685	3.70685	3.70685	4.19364	3.86782	4.50852	4.60514	4.61529	4.00986	5.21587	5.39774	5.41686	4.02651	5.29882	5.49068	5.51085
		4	10000	3.91055	3.91055	3.91055	3.91055	4.39738	4.07889	4.63169	4.7093	4.71737	4.22743	5.26799	5.41408	5.42928	4.24484	5.3426	5.49672	5.51275
		4.1	12589.3	4.09558	4.09558	4.09558	4.09558	4.57957	4.27062	4.74145	4.80366	4.81008	4.42507	5.31134	5.42842	5.44051	4.44318	5.37816	5.50168	5.51443
		4.2	15848.9	4.26022	4.26022	4.26022	4.26022	4.73943	4.44122	4.83767	4.88744	4.89254	4.60092	5.34719	5.44087	5.45047	4.61965	5.40693	5.50576	5.51589
		4.3	19952.6	4.40403	4.40403	4.40403	4.40403	4.87735	4.59023	4.92075	4.96051	4.96456	4.75453	5.37668	5.45152	5.45915	4.77379	5.43014	5.50909	5.51715
		4.4	25118.9	4.52763	4.52763	4.52763	4.52763	4.99465	4.7183	4.99151	5.02323	5.02646	4.88655	5.40081	5.46053	5.4666	4.90627	5.44881	5.51181	5.51821
		4.5	31622.8	4.63239	4.63239	4.63239	4.63239	5.09319	4.82686	5.05106	5.07635	5.07891	4.99845	5.42047	5.46808	5.4729	5.01857	5.46378	5.51401	5.5191
		4.6	39810.7	4.72015	4.72015	4.72015	4.72015	5.1751	4.9178	5.10067	5.12081	5.12285	5.09219	5.43641	5.47434	5.47817	5.11264	5.47578	5.51579	5.51984
		4.7	50118.7	4.79294	4.79294	4.79294	4.79294	5.24263	4.99322	5.14163	5.15767	5.15929	5.16994	5.4493	5.4795	5.48254	5.19066	5.48538	5.51723	5.52044
		4.8	63095.7	4.85282	4.85282	4.85282	4.85282	5.29789	5.05527	5.17522	5.18798	5.18927	5.2339	5.45968	5.48371	5.48613	5.25484	5.49304	5.51839	5.52094
		4.9	79432.8	4.90175	4.90175	4.90175	4.90175	5.34285	5.10597	5.20259	5.21274	5.21376	5.28616	5.46803	5.48714	5.48907	5.30729	5.49915	5.51932	5.52135
		5	100000	4.94152	4.94152	4.94152	4.94152	5.37926	5.14717	5.22478	5.23286	5.23367	5.32863	5.47472	5.48992	5.49145	5.34991	5.50403	5.52007	5.52168
		5.1	125893	4.97368	4.97368	4.97368	4.97368	5.40864	5.1805	5.2427	5.24913	5.24977	5.36299	5.48008	5.49216	5.49338	5.38439	5.50791	5.52066	5.52194
		5.2	158489	4.99961	4.99961	4.99961	4.99961	5.43226	5.20737	5.25713	5.26224	5.26275	5.39068	5.48436	5.49397	5.49493	5.41218	5.511	5.52114	5.52215
		5.3	199526	5.02045	5.02045	5.02045	5.02045	5.45121	5.22896	5.26871	5.27277	5.27318	5.41294	5.48778	5.49541	5.49618	5.43451	5.51346	5.52152	5.52232
		5.4	251189	5.03715	5.03715	5.03715	5.03715	5.46639	5.24627	5.27799	5.28122	5.28154	5.43078	5.4905	5.49657	5.49718	5.45242	5.51542	5.52182	5.52246
		5.5	316228	5.05052	5.05052	5.05052	5.05052	5.47851	5.26012	5.28541	5.28798	5.28823	5.44506	5.49267	5.49749	5.49798	5.46675	5.51697	5.52206	5.52257
		5.6	398107	5.06121	5.06121	5.06121	5.06121	5.4882	5.27119	5.29134	5.29338	5.29358	5.45648	5.4944	5.49823	5.49862	5.4782	5.51821	5.52225	5.52266
		5.7	501187	5.06973	5.06973	5.06973	5.06973	5.49592	5.28003	5.29607	5.29769	5.29785	5.46558	5.49578	5.49882	5.49913	5.48734	5.5192	5.52241	5.52273
		5.8	630957	5.07653	5.07653	5.07653	5.07653	5.50207	5.28707	5.29984	5.30112	5.30125	5.47284	5.49687	5.49929	5.49953	5.49463	5.51998	5.52253	5.52278
		5.9	794328	5.08195	5.08195	5.08195	5.08195	5.50697	5.29268	5.30284	5.30386	5.30396	5.47863	5.49774	5.49967	5.49986	5.50043	5.5206	5.52263	5.52283
		6	1e+06	5.08626	5.08626	5.08626	5.08626	5.51087	5.29715	5.30523	5.30604	5.30612	5.48324	5.49844	5.49996	5.50012	5.50506	5.52109	5.5227	5.52286
