# Supplementary material for: Evolution of Hominin Detoxification: Neanderthal and Modern Human Ah Receptor Respond Similarly to TCDD
Source: Oxford University Press journal article supplement (doi:10.1093/molbev/msaa287), 2020-11-04
Supplement: msaa287_supplementary_data.zip [file msaa287_supplementary_data.zip › SI8_Primer List.xlsx]

## Sheet: Sheet1
Supplementary Information SI8.
List of Primers Used in this Study
Purpose	Primer Name	Primer Sequence 5' > 3'	Length (nt)	Annealing temperature1) (°C)
Generate pSC119159 segment with complete 5'-UTR of the human reference AHR transcript (185A-variant)
Upstream primer	pCMV6-XL4_918-937	AGCAGAGCTCGTTTAGTGAA	20	61
Downstream primer	AHR_ENST643-630_XhoI	AAAAAACTCGAGGGTGCCCAGCCGAC	26
Generate upper pSC119159 segment with partial AHR 5'-UTR carrying Neanderthal 185G variant
Upstream primer	pCMV6-XL4_918-937	AGCAGAGCTCGTTTAGTGAA	20	58
Downstream primer	AHR_ENST200-170_185G_rev	GCTCCCGGGACTTCCCAAATCCAGGGTGCTT	31
Generate lower pSC119159 segment with partial AHR 5'-UTR carrying Neanderthal 185G variant
Upstream primer	AHR_ENST173-203_185G_fwd	CACCCTGGATTTGGGAAGTCCCGGGAGCAGC	31	65
Downstream primer	AHR_ENST643-630_XhoI	AAAAAACTCGAGGGTGCCCAGCCGAC	26
Overlap extension PCR with upper and lower pSC119159 segment carrying Neanderthal 185G AHR 5'-UTR variant
Upstream primer	pCMV6-XL4_918-937	AGCAGAGCTCGTTTAGTGAA	20	55
Downstream primer	AHR_ENST643-630_XhoI	AAAAAACTCGAGGGTGCCCAGCCGAC	26
Sequence control of the 185A/G variant in the AHR 5'-UTR-EGFP mRNA fusion construct in pcDNA3-EGFP
EFGP coding region reverse primer	EGFP_cDNA141-123	GAACTTCAGGGTCAGCTTG	19	50
Identity control of the pcDNA3.1/Zeo(+) expression constructs carrying the AHR gene synthesis product
Sequencing around Val381Ala variation (position 1785 in Ensembl AHR reference transcript ENST00000242057.8)	AHR_Mut2Ctr1630-1654	TATGCTTTATTGTGCCGAGTCC	22	50
	AHR_Mut2Ctr1914-1891	ATTATGGCAGGAAAAGGGTTGGTT	24	50
Quantitative reverse transcription PCR
Cytochrome P450 1A1 (CYP1A1)2)	CYP1A1_Hum_F	TCCTGGAGCCTCATGTATTTGGTG	24	60
	CYP1A1_Hum_R	TGGTGAAGGGGACGAAGGAAGAGT	24
Zeocin resistance gene (ZEO)3)	Zeocin1_F	TGGGCGCTCTTCCGCTTCCTC	21	60
	Zeocin1_R	AACGCGGCCTTTTTACGGTTCCTG	24
b-Actin (ACTB)3,4)	ACTB-F_Hum_Lin_F	TCATGAAGTGTGACGTGGACATC	23	60
	ACTB-R_Hum_Lin_R	CAGGAGGAGCAATGATCTTGATCT	24
Aryl hydrocarbon receptor (AHR)3,4)	AHR-F_Hum_Lin_F	ACATCACCTACGCCAGTCGC	20	60
	AHR-R_Hum_Lin_R	TCTATGCCGCTTGGAAGGAT	20
Aryl hydrocarbon receptor nuclear translocator (ARNT)3,4)	ARNT-F_Hum_Lin_F	GCTGCTGCCTACCCTAGTCTCA	22	60
	ARNT-R_Hum_Lin_R	GCTGTCCGTGTCTGGAATTGT	21
1) Optimal annealing temperature as determined using the PrimerSelect module of the DNASTAR LaserGene Core Suite, version 10. All sequencing reactions were outsourced to Macrogen Europe (Amsterdam, The Netherlands) and therefore their standard annealing temperature of 50 °C is listed.
2) qPCR primers spanned an intron, and were verified by gel electrophoresis and Sanger sequencing to amplify only the correct cDNA-derived and not the genomic DNA-derived product.
3) qPCR primers were verified by gel electrophoresis and Sanger sequencing to amplify only the correct product.
4) Derived from Lin et al. (2003); one of the primers in each pair was placed at the junction between two exons to avoid amplification of genomic DNA.
Literature reference
Lin P, Hu S-W, Chang T-H. 2003. Correlation between Gene Expression of Aryl Hydrocarbon Receptor (AhR), Hydrocarbon Receptor Nuclear Translocator (Arnt), Cytochromes P4501A1 (CYP1A1) and 1B1 (CYP1B1), and Inducibility of CYP1A1 and CYP1B1 in Human Lymphocytes. Toxicol Sci 71(1):20-26.
