# Supplementary material for: Evolution of Hominin Detoxification: Neanderthal and Modern Human Ah Receptor Respond Similarly to TCDD
Source: Oxford University Press journal article supplement (doi:10.1093/molbev/msaa287), 2020-11-04
Supplement: msaa287_supplementary_data.zip [file msaa287_supplementary_data.zip › SI9_AHR_Protein.pdf]

## Supplementary Information SI9

### Alignment of AHR protein sequences

Alignment of the modern human (Ensembl ID: ENSP00000242057.4) and Neanderthal AHR proteins encoded by the mRNA sequences used in this study (based on ENST00000242057.8), and the modern human and Neanderthal AHR proteins studied by Hubbard et al. (2016), illustrating that the AHR protein variants compared in both studies are identical. To depict the substantial amino acid sequence divergence, in addition to the Ala381Val polymorphism, of the modern human “Val-type” and ancient hominin “Ala-type” AHR proteins versus the rodent “Ala-type” AHRs, the amino acid sequences of the mouse and rat AHR proteins from the Ensemble database (Release 99 - January 2020) are also included. Amino acid residues that differ from the modern human AHR amino acid sequence encoded by the modern human *AHR* reference transcript (ENST00000242057.8) are highlighted in red. Alignment was performed using the ClustalW module of Lasergene DNASTar (version 10) with default parameter settings.

#### Reference:

Hubbard TD, Murray IA, Bisson WH, Sullivan AP, Sebastian A, Perry GH, Jablonski NG, Perdew GH. 2016. Divergent Ah Receptor Ligand Selectivity during Hominin Evolution. *Mol Biol Evol* 33(10):2648-2658.

|                                        |     |     |     |     |     |   |    |    |    |    |    |    |   |   |    |    |    |    |    |   |   |    |    |    |    |    |    |    |    |    |   |    |    |    |    |    |   |   |   |   |     |    |     |    |   |     |     |     |    |
|----------------------------------------|-----|-----|-----|-----|-----|---|----|----|----|----|----|----|---|---|----|----|----|----|----|---|---|----|----|----|----|----|----|----|----|----|---|----|----|----|----|----|---|---|---|---|-----|----|-----|----|---|-----|-----|-----|----|
|                                        | 10  | 20  | 30  | 40  | 50  |   |    |    |    |    |    |    |   |   |    |    |    |    |    |   |   |    |    |    |    |    |    |    |    |    |   |    |    |    |    |    |   |   |   |   |     |    |     |    |   |     |     |     |    |
| Human_AHR-201_ENSP00000242057.4.pro    | MN  | SS  | S   | A   | N   | I | TY | A  | S  | R  | K  | R  | R | K | P  | V  | Q  | K  | T  | V | K | P  | I  | PA | E  | G  | I  | K  | S  | N  | P | S  | K  | R  | H  | R  | D | R | L | N | T   | E  | L   | D  | R | L   | 50  |     |    |
| Neanderthal_AHR_this study.pro         | MN  | SS  | S   | A   | N   | I | TY | A  | S  | R  | K  | R  | R | K | P  | V  | Q  | K  | T  | V | K | P  | I  | PA | E  | G  | I  | K  | S  | N  | P | S  | K  | R  | H  | R  | D | R | L | N | T   | E  | L   | D  | R | L   | 50  |     |    |
| Human_AHR_Hubbard.pro                  | MN  | SS  | S   | A   | N   | I | TY | A  | S  | R  | K  | R  | R | K | P  | V  | Q  | K  | T  | V | K | P  | I  | PA | E  | G  | I  | K  | S  | N  | P | S  | K  | R  | H  | R  | D | R | L | N | T   | E  | L   | D  | R | L   | 50  |     |    |
| Neanderthal_AHR_Hubbard.pro            | MN  | SS  | S   | A   | N   | I | TY | A  | S  | R  | K  | R  | R | K | P  | V  | Q  | K  | T  | V | K | P  | I  | PA | E  | G  | I  | K  | S  | N  | P | S  | K  | R  | H  | R  | D | R | L | N | T   | E  | L   | D  | R | L   | 50  |     |    |
| Mouse_Ahr-202_ENSMUSP00000112137.2.pro | M   | S   | S   | G   | A   | N | I  | T  | Y  | A  | S  | R  | K | R | R  | K  | P  | V  | Q  | K | T | V  | K  | P  | I  | PA | E  | G  | I  | K  | S | N  | P  | S  | K  | R  | H | R | D | R | L   | N  | T   | E  | L | D   | R   | L   | 49 |
| Rat_Ahr-201_ENSRNOP00000006618.5.pro   | M   | S   | S   | G   | A   | N | I  | T  | Y  | A  | S  | R  | K | R | R  | K  | P  | V  | Q  | K | T | V  | K  | P  | I  | PA | E  | G  | I  | K  | S | N  | P  | S  | K  | R  | H | R | D | R | L   | N  | T   | E  | L | D   | R   | L   | 49 |
|                                        | 60  | 70  | 80  | 90  | 100 |   |    |    |    |    |    |    |   |   |    |    |    |    |    |   |   |    |    |    |    |    |    |    |    |    |   |    |    |    |    |    |   |   |   |   |     |    |     |    |   |     |     |     |    |
| Human_AHR-201_ENSP00000242057.4.pro    | AS  | LL  | P   | F   | P   | Q | D  | V  | I  | NK | L  | D  | K | L | SV | L  | R  | SV | S  | Y | L | RA | K  | S  | F  | F  | D  | V  | AL | K  | S | S  | P  | T  | E  | R  | N | G | G | Q | D   | N  | 100 |    |   |     |     |     |    |
| Neanderthal_AHR_this study.pro         | AS  | LL  | P   | F   | P   | Q | D  | V  | I  | NK | L  | D  | K | L | SV | L  | R  | SV | S  | Y | L | RA | K  | S  | F  | F  | D  | V  | AL | K  | S | S  | P  | T  | E  | R  | N | G | G | Q | D   | N  | 100 |    |   |     |     |     |    |
| Human_AHR_Hubbard.pro                  | AS  | LL  | P   | F   | P   | Q | D  | V  | I  | NK | L  | D  | K | L | SV | L  | R  | SV | S  | Y | L | RA | K  | S  | F  | F  | D  | V  | AL | K  | S | S  | P  | T  | E  | R  | N | G | G | Q | D   | N  | 100 |    |   |     |     |     |    |
| Neanderthal_AHR_Hubbard.pro            | AS  | LL  | P   | F   | P   | Q | D  | V  | I  | NK | L  | D  | K | L | SV | L  | R  | SV | S  | Y | L | RA | K  | S  | F  | F  | D  | V  | AL | K  | S | S  | P  | T  | E  | R  | N | G | G | Q | D   | N  | 100 |    |   |     |     |     |    |
| Mouse_Ahr-202_ENSMUSP00000112137.2.pro | AS  | LL  | P   | F   | P   | Q | D  | V  | I  | NK | L  | D  | K | L | SV | L  | R  | SV | S  | Y | L | RA | K  | S  | F  | F  | D  | V  | AL | K  | S | T  | P  | A  | D  | R  | N | G | G | Q | D   | Q  | 99  |    |   |     |     |     |    |
| Rat_Ahr-201_ENSRNOP00000006618.5.pro   | AS  | LL  | P   | F   | P   | Q | D  | V  | I  | S  | K  | L  | D | K | L  | SV | L  | R  | SV | S | Y | L  | RA | K  | S  | F  | F  | D  | V  | AL | K | S  | T  | P  | A  | D  | R | S | R | G | Q   | D  | Q   | 99 |   |     |     |     |    |
|                                        | 110 | 120 | 130 | 140 | 150 |   |    |    |    |    |    |    |   |   |    |    |    |    |    |   |   |    |    |    |    |    |    |    |    |    |   |    |    |    |    |    |   |   |   |   |     |    |     |    |   |     |     |     |    |
| Human_AHR-201_ENSP00000242057.4.pro    | CR  | AA  | N   | F   | R   | E | G  | L  | N  | L  | Q  | E  | G | E | F  | L  | L  | Q  | A  | L | N | G  | F  | V  | L  | V  | T  | T  | D  | A  | L | V  | F  | Y  | A  | S  | S | T | I | Q | D   | Y  | L   | G  | F | Q   | Q   | 150 |    |
| Neanderthal_AHR_this study.pro         | CR  | AA  | N   | F   | R   | E | G  | L  | N  | L  | Q  | E  | G | E | F  | L  | L  | Q  | A  | L | N | G  | F  | V  | L  | V  | T  | T  | D  | A  | L | V  | F  | Y  | A  | S  | S | T | I | Q | D   | Y  | L   | G  | F | Q   | Q   | 150 |    |
| Human_AHR_Hubbard.pro                  | CR  | AA  | N   | F   | R   | E | G  | L  | N  | L  | Q  | E  | G | E | F  | L  | L  | Q  | A  | L | N | G  | F  | V  | L  | V  | T  | T  | D  | A  | L | V  | F  | Y  | A  | S  | S | T | I | Q | D   | Y  | L   | G  | F | Q   | Q   | 150 |    |
| Neanderthal_AHR_Hubbard.pro            | CR  | AA  | N   | F   | R   | E | G  | L  | N  | L  | Q  | E  | G | E | F  | L  | L  | Q  | A  | L | N | G  | F  | V  | L  | V  | T  | T  | D  | A  | L | V  | F  | Y  | A  | S  | S | T | I | Q | D   | Y  | L   | G  | F | Q   | Q   | 150 |    |
| Mouse_Ahr-202_ENSMUSP00000112137.2.pro | CR  | AQ  | -   | I   | R   | D | W  | Q  | D  | L  | Q  | E  | G | E | F  | L  | L  | Q  | A  | L | N | G  | F  | V  | L  | V  | T  | A  | D  | A  | L | V  | F  | Y  | A  | S  | S | T | I | Q | D   | Y  | L   | G  | F | Q   | Q   | 148 |    |
| Rat_Ahr-201_ENSRNOP00000006618.5.pro   | CR  | AQ  | -   | I   | R   | D | W  | Q  | D  | L  | Q  | E  | G | E | F  | L  | L  | Q  | A  | L | N | G  | F  | V  | L  | V  | T  | A  | D  | A  | L | V  | F  | Y  | A  | S  | S | T | I | Q | D   | Y  | L   | G  | F | Q   | Q   | 148 |    |
|                                        | 160 | 170 | 180 | 190 | 200 |   |    |    |    |    |    |    |   |   |    |    |    |    |    |   |   |    |    |    |    |    |    |    |    |    |   |    |    |    |    |    |   |   |   |   |     |    |     |    |   |     |     |     |    |
| Human_AHR-201_ENSP00000242057.4.pro    | SD  | VI  | HQ  | S   | V   | Y | E  | L  | I  | HT | ED | RA | E | F | Q  | R  | Q  | L  | H  | W | A | L  | N  | P  | S  | Q  | C  | T  | E  | S  | G | G  | I  | EE | AT | GL | P | Q | T | V | 200 |    |     |    |   |     |     |     |    |
| Neanderthal_AHR_this study.pro         | SD  | VI  | HQ  | S   | V   | Y | E  | L  | I  | HT | ED | RA | E | F | Q  | R  | Q  | L  | H  | W | A | L  | N  | P  | S  | Q  | C  | T  | E  | S  | G | G  | I  | EE | AT | GL | P | Q | T | V | 200 |    |     |    |   |     |     |     |    |
| Human_AHR_Hubbard.pro                  | SD  | VI  | HQ  | S   | V   | Y | E  | L  | I  | HT | ED | RA | E | F | Q  | R  | Q  | L  | H  | W | A | L  | N  | P  | S  | Q  | C  | T  | E  | S  | G | G  | I  | EE | AT | GL | P | Q | T | V | 200 |    |     |    |   |     |     |     |    |
| Neanderthal_AHR_Hubbard.pro            | SD  | VI  | HQ  | S   | V   | Y | E  | L  | I  | HT | ED | RA | E | F | Q  | R  | Q  | L  | H  | W | A | L  | N  | P  | S  | Q  | C  | T  | E  | S  | G | G  | I  | EE | AT | GL | P | Q | T | V | 200 |    |     |    |   |     |     |     |    |
| Mouse_Ahr-202_ENSMUSP00000112137.2.pro | SD  | VI  | HQ  | S   | V   | Y | E  | L  | I  | HT | ED | RA | E | F | Q  | R  | Q  | L  | H  | W | A | L  | N  | P  | S  | Q  | C  | T  | E  | S  | G | G  | I  | EE | AT | GL | P | Q | T | V | 194 |    |     |    |   |     |     |     |    |
| Rat_Ahr-201_ENSRNOP00000006618.5.pro   | SD  | VI  | HQ  | S   | V   | Y | E  | L  | I  | HT | ED | RA | E | F | Q  | R  | Q  | L  | H  | W | A | L  | N  | P  | S  | Q  | C  | T  | E  | S  | G | G  | I  | EE | AT | GL | P | Q | T | V | 198 |    |     |    |   |     |     |     |    |
|                                        | 210 | 220 | 230 | 240 | 250 |   |    |    |    |    |    |    |   |   |    |    |    |    |    |   |   |    |    |    |    |    |    |    |    |    |   |    |    |    |    |    |   |   |   |   |     |    |     |    |   |     |     |     |    |
| Human_AHR-201_ENSP00000242057.4.pro    | VC  | YN  | P   | D   | Q   | I | PP | EN | S  | P  | L  | M  | E | R | C  | F  | I  | C  | R  | L | R | C  | L  | L  | D  | N  | S  | S  | G  | F  | L | AM | N  | F  | Q  | G  | K | L | K | Y | L   | H  | G   | Q  | K | 250 |     |     |    |
| Neanderthal_AHR_this study.pro         | VC  | YN  | P   | D   | Q   | I | PP | EN | S  | P  | L  | M  | E | R | C  | F  | I  | C  | R  | L | R | C  | L  | L  | D  | N  | S  | S  | G  | F  | L | AM | N  | F  | Q  | G  | K | L | K | Y | L   | H  | G   | Q  | K | 250 |     |     |    |
| Human_AHR_Hubbard.pro                  | VC  | YN  | P   | D   | Q   | I | PP | EN | S  | P  | L  | M  | E | R | C  | F  | I  | C  | R  | L | R | C  | L  | L  | D  | N  | S  | S  | G  | F  | L | AM | N  | F  | Q  | G  | K | L | K | Y | L   | H  | G   | Q  | K | 250 |     |     |    |
| Neanderthal_AHR_Hubbard.pro            | VC  | YN  | P   | D   | Q   | I | PP | EN | S  | P  | L  | M  | E | R | C  | F  | I  | C  | R  | L | R | C  | L  | L  | D  | N  | S  | S  | G  | F  | L | AM | N  | F  | Q  | G  | K | L | K | Y | L   | H  | G   | Q  | K | 250 |     |     |    |
| Mouse_Ahr-202_ENSMUSP00000112137.2.pro | VY  | Y   | T   | P   | D   | Q | I  | PP | EN | S  | P  | L  | M | E | R  | C  | F  | I  | C  | R | L | R  | C  | L  | L  | D  | N  | S  | S  | G  | F | L  | AM | N  | F  | Q  | G | R | L | K | Y   | L  | H   | G  | Q | N   | 244 |     |    |
| Rat_Ahr-201_ENSRNOP00000006618.5.pro   | VY  | Y   | T   | P   | D   | Q | I  | PP | EN | S  | P  | L  | M | E | R  | C  | F  | I  | C  | R | L | R  | C  | L  | L  | D  | N  | S  | S  | G  | F | L  | AM | N  | F  | Q  | G | R | L | K | Y   | L  | H   | G  | Q | N   | 248 |     |    |
|                                        | 260 | 270 | 280 | 290 | 300 |   |    |    |    |    |    |    |   |   |    |    |    |    |    |   |   |    |    |    |    |    |    |    |    |    |   |    |    |    |    |    |   |   |   |   |     |    |     |    |   |     |     |     |    |
| Human_AHR-201_ENSP00000242057.4.pro    | KK  | GK  | D   | G   | S   | I | L  | P  | P  | Q  | L  | A  | L | F | A  | I  | AT | P  | L  | Q | P | P  | S  | I  | LE | I  | RT | KN | FI | F  | R | T  | K  | H  | K  | L  | D | F | T | P | I   | GC | 300 |    |   |     |     |     |    |
| Neanderthal_AHR_this study.pro         | KK  | GK  | D   | G   | S   | I | L  | P  | P  | Q  | L  | A  | L | F | A  | I  | AT | P  | L  | Q | P | P  | S  | I  | LE | I  | RT | KN | FI | F  | R | T  | K  | H  | K  | L  | D | F | T | P | I   | GC | 300 |    |   |     |     |     |    |
| Human_AHR_Hubbard.pro                  | KK  | GK  | D   | G   | S   | I | L  | P  | P  | Q  | L  | A  | L | F | A  | I  | AT | P  | L  | Q | P | P  | S  | I  | LE | I  | RT | KN | FI | F  | R | T  | K  | H  | K  | L  | D | F | T | P | I   | GC | 300 |    |   |     |     |     |    |
| Neanderthal_AHR_Hubbard.pro            | KK  | GK  | D   | G   | S   | I | L  | P  | P  | Q  | L  | A  | L | F | A  | I  | AT | P  | L  | Q | P | P  | S  | I  | LE | I  | RT | KN | FI | F  | R | T  | K  | H  | K  | L  | D | F | T | P | I   | GC | 300 |    |   |     |     |     |    |
| Mouse_Ahr-202_ENSMUSP00000112137.2.pro | KK  | GK  | D   | G   | S   | I | L  | P  | P  | Q  | L  | A  | L | F | A  | I  | AT | P  | L  | Q | P | P  | S  | I  | LE | I  | RT | KN | FI | F  | R | T  | K  | H  | K  | L  | D | F | T | P | I   | GC | 294 |    |   |     |     |     |    |
| Rat_Ahr-201_ENSRNOP00000006618.5.pro   | KK  | GK  | D   | G   | S   | I | L  | P  | P  | Q  | L  | A  | L | F | A  | I  | AT | P  | L  | Q | P | P  | S  | I  | LE | I  | RT | KN | FI | F  | R | T  | K  | H  | K  | L  | D | F | T | P | I   | GC | 298 |    |   |     |     |     |    |

Human\_AHR-201\_ENSP00000242057.4.pro  
Neanderthal\_AHR\_this study.pro  
Human\_AHR\_Hubbard.pro  
Neanderthal\_AHR\_Hubbard.pro  
Mouse\_Ahr-202\_ENSMUSP00000112137.2.pro  
Rat\_Ahr-201\_ENSRNOP00000006618.5.pro

```
310      320      330      340      350
DAKGRI VLGYTEAELCTRGSGYQFI HAADMLYCAESHI RMI KTGESGMI V 350
DAKGRLI LGYTEVELCTRGSGYQFI HAADMLYCAESHI RMI KTGESGMI V 344
DAKGRLI LGYTEVELCNKSGSYQFI HAADMLYCAESHI RMI KTGESGMI V 348
```

Human\_AHR-201\_ENSP00000242057.4.pro  
Neanderthal\_AHR\_this study.pro  
Human\_AHR\_Hubbard.pro  
Neanderthal\_AHR\_Hubbard.pro  
Mouse\_Ahr-202\_ENSMUSP00000112137.2.pro  
Rat\_Ahr-201\_ENSRNOP00000006618.5.pro

```
360      370      380      390      400
FRLLT KNNRWTWQSNARLLYKNGRPDYI I VTQRPLTDEEGTEHLRKRNT 400
FRLLA KHSRWRWQSNARLLYKNGRPDYI I VTQRPLTDEEGTEHLRKRNT 394
FRLLA KHSRWRWQSNARLLYKNGRPDYI I VTQRPLTDEEGTEHLRKRNT 398
```

Human\_AHR-201\_ENSP00000242057.4.pro  
Neanderthal\_AHR\_this study.pro  
Human\_AHR\_Hubbard.pro  
Neanderthal\_AHR\_Hubbard.pro  
Mouse\_Ahr-202\_ENSMUSP00000112137.2.pro  
Rat\_Ahr-201\_ENSRNOP00000006618.5.pro

```
410      420      430      440      450
KL PFMFTTGEAVLYEATNPFFAI MDPLPLRTKNGTSGKDSATTSTLSKDS 450
KL PFMFTTGEAVLYEATNPFFAI MDPLPLRTKNGTSGKDSATTSTLSKDS 450
KL PFMFTTGEAVLYEATNPFFAI MDPLPLRTKNGTSGKDSATTSTLSKDS 450
KL PFMFTTGEAVLYEATNPFFAI MDPLPLRTKNGTSGKDSATTSTLSKDS 450
SL PFMFTTGEAVLYEATNPFFAI MDPLPLRTKNGTSGKDSATTSTLSKDS 444
TL PFMFTTGEAVLYEATNPFFAI MDPLPLRTKNGTSGKDSATTSTLSKDS 448
```

Human\_AHR-201\_ENSP00000242057.4.pro  
Neanderthal\_AHR\_this study.pro  
Human\_AHR\_Hubbard.pro  
Neanderthal\_AHR\_Hubbard.pro  
Mouse\_Ahr-202\_ENSMUSP00000112137.2.pro  
Rat\_Ahr-201\_ENSRNOP00000006618.5.pro

```
460      470      480      490      500
LNPSLLAAMMQQDESI YLYPASSTSTAPFENNFFNESMNECRNWQDNT 500
LNPSLLAAMMQQDESI YLYPASSTSTAPFENNFFNESMNECRNWQDNT 500
LNPSLLAAMMQQDESI YLYPASSTSTAPFENNFFNESMNECRNWQDNT 500
LNPSLLAAMMQQDESI YLYPASSTSTAPFENNFFNESMNECRNWQDNT 500
FHPSSLMSALIQQDESI YLYCPSS---SPALLDSHF LMGVSYSKCGSWQDSF 491
FHPNSLMSALIQQDESI YLYCPSS---SPALLDSHF LMDSMSECGSWQGSF 495
```

Human\_AHR-201\_ENSP00000242057.4.pro  
Neanderthal\_AHR\_this study.pro  
Human\_AHR\_Hubbard.pro  
Neanderthal\_AHR\_Hubbard.pro  
Mouse\_Ahr-202\_ENSMUSP00000112137.2.pro  
Rat\_Ahr-201\_ENSRNOP00000006618.5.pro

```
510      520      530      540
APMGNDTI LKHEQI DQPQDVN SFAGGHPGLFQDSKNSDLYSI MKNLGI D 549
AAAGSEAA LKHEQI GHADQDVN LALSGGPSELFPDNKNNDLYSI MRNLGI D 541
AAASNEAL LKHEQI RHADQDVN LALSGGPSELFPDNKNNDLYSI MRNLGI D 545
```

Human\_AHR-201\_ENSP00000242057.4.pro  
Neanderthal\_AHR\_this study.pro  
Human\_AHR\_Hubbard.pro  
Neanderthal\_AHR\_Hubbard.pro  
Mouse\_Ahr-202\_ENSMUSP00000112137.2.pro  
Rat\_Ahr-201\_ENSRNOP00000006618.5.pro

```
550      560      570      580      590
FEDI RHMQNEKFFRNDF--SGEVDFRDI DLTDEI LTYVQDSL SKSPFI PS 597
FEDI KHMQNEKFFRNDF--SGEVDFRDI DLTDEI LTYVQDSL SKSPFI PS 597
FEDI RHMQNEKFFRNDF--SGEVDFRDI DLTDEI LTYVQDSL SKSPFI PS 597
FEDI KHMQNEKFFRNDF--SGEVDFRDI DLTDEI LTYVQDSL SKSPFI PS 597
FEDI RSMQNEEFFRDTAAAGEVDFKDI DLTDEI LTYVQDSL NNSFTLLNS 591
FEDI RSMQNEEFFRDTDS--SGEVDFKDI DLTDEI LTYVQDSL NNSFTLLNS 593
```

Human\_AHR-201\_ENSP00000242057.4.pro  
Neanderthal\_AHR\_this study.pro  
Human\_AHR\_Hubbard.pro  
Neanderthal\_AHR\_Hubbard.pro  
Mouse\_Ahr-202\_ENSMUSP00000112137.2.pro  
Rat\_Ahr-201\_ENSRNOP00000006618.5.pro

```
600      610      620      630      640
DYQQQQSLALNSSCMVQEHLHLEQQQQHHQK--QVVVEPQQQLCO----- 640
DYQQQQSLALNSSCMVQEHLHLEQQQQHHQK--QVVVEPQQQLCO----- 640
DYQQQQSLALNSSCMVQEHLHLEQQQQHHQK--QVVVEPQQQLCO----- 640
DYQQQQSLALNSSCMVQEHLHLEQQQQHHQK--QVVVEPQQQLCO----- 640
ACQQQ--PVTQHLSCMQLERLQLEQQQLQOPPPQAL EPQQQLCOMVCPQ 639
ACQQQ--PVSQHLSCMQLERLQLEQQQLQOQHPTQTLEPQRQLCOVEVPQ 642
```

Human\_AHR-201\_ENSP00000242057.4.pro  
Neanderthal\_AHR\_this study.pro  
Human\_AHR\_Hubbard.pro  
Neanderthal\_AHR\_Hubbard.pro  
Mouse\_Ahr-202\_ENSMUSP00000112137.2.pro  
Rat\_Ahr-201\_ENSRNOP00000006618.5.pro

```
650      660      670      680
-----KMKHMQVNGMFENWNSNQFVFPNCPQQDPQQYNVFTDLHGI SQEF 685
-----KMKHMQVNGMFENWNSNQFVFPNCPQQDPQQYNVFTDLHGI SQEF 685
-----KMKHMQVNGMFENWNSNQFVFPNCPQQDPQQYNVFTDLHGI SQEF 685
-----KMKHMQVNGMFENWNSNQFVFPNCPQQDPQQYNVFTDLHGI SQEF 685
QDLG--PKHTQNGTFASWNPPTPVSFNCPQQLKHYQLFSSLGQTAEF 687
HELQKTKHMQVNGMFASWNPAPPVSFNCPQQLKHYQLFSSLGQTAEF 692
```

Human\_AHR-201\_ENSP00000242057.4.pro  
Neanderthal\_AHR\_this study.pro  
Human\_AHR\_Hubbard.pro  
Neanderthal\_AHR\_Hubbard.pro  
Mouse\_Ahr-202\_ENSMUSP00000112137.2.pro  
Rat\_Ahr-201\_ENSRNOP00000006618.5.pro

```
690      700      710      720      730
PYKSEMDSPYTNFI SCNQVLPQHASKCTELDYPMGSEFSPYPTTSSL 735
PYKSEMDSPYTNFI SCNQVLPQHASKCTELDYPMGSEFSPYPTTSSL 735
PYKSEMDSPYTNFI SCNQVLPQHASKCTELDYPMGSEFSPYPTTSSL 735
PYKSEMDSPYTNFI SCNQVLPQHASKCTELDYPMGSEFSPYPTTSSL 735
PYKPEVDSMPYTNFAPCNQPLPEHSGKQLDFPGRDFEPSLPTTSSL 737
PYKSEVDSMPYTNFAPCNQSLPEHSGKQLDFPGRDFEPSLPTTSSL 742
```

Human\_AHR-201\_ENSP00000242057.4.pro  
Neanderthal\_AHR\_this study.pro  
Human\_AHR\_Hubbard.pro  
Neanderthal\_AHR\_Hubbard.pro  
Mouse\_Ahr-202\_ENSMUSP00000112137.2.pro  
Rat\_Ahr-201\_ENSRNOP00000006618.5.pro

|                           |      |                          |     |     |     |
|---------------------------|------|--------------------------|-----|-----|-----|
| 740                       | 750  | 760                      | 770 | 780 |     |
| EDFVTCLQLPENQKHGLNPQSAI   | I    | TPQTCYAGAVSMYQCQPEPQHTHV | GQ  |     | 785 |
| EDFVTCLQLPENQKHGLNPQSAI   | I    | TPQTCYAGAVSMYQCQPEPQHTHV | GQ  |     | 785 |
| EDFVTCLQLPENQKHGLNPQSAI   | I    | TPQTCYAGAVSMYQCQPEPQHTHV | GQ  |     | 785 |
| EDFVTCLQLPENQKHGLNPQSAI   | I    | TPQTCYAGAVSMYQCQPEPQHTHV | GQ  |     | 785 |
| D-FVSCLQVPENQSHGINSQSAMVS | PQAY | YAGAMSMYQCQPGPQHTPVDQ    |     |     | 786 |
| EDFVSCLQVPENQSHGINSQSAMVS | PQAY | YAGAMSMYQCQAGPQHTPVDQ    |     |     | 792 |

Human\_AHR-201\_ENSP00000242057.4.pro  
Neanderthal\_AHR\_this study.pro  
Human\_AHR\_Hubbard.pro  
Neanderthal\_AHR\_Hubbard.pro  
Mouse\_Ahr-202\_ENSMUSP00000112137.2.pro  
Rat\_Ahr-201\_ENSRNOP00000006618.5.pro

|                     |                |                  |         |     |     |
|---------------------|----------------|------------------|---------|-----|-----|
| 790                 | 800            | 810              | 820     | 830 |     |
| MQYNPVLPGQQAFLNKFQN | GVLNETYPAELNNI | NNTQTTTHLQPLHHPS |         |     | 834 |
| MQYNPVLPGQQAFLNKFQN | GVLNETYPAELNNI | NNTQTTTHLQPLHHPS |         |     | 834 |
| MQYNPVLPGQQAFLNKFQN | GVLNETYPAELNNI | NNTQTTTHLQPLHHPS |         |     | 834 |
| MQYNPVLPGQQAFLNKFQN | GVLNETYPAELNNI | NNTQTTTHLQPLHHPS |         |     | 834 |
| TQYSSEIPGSQAFLSKVQS |                |                  |         |     | 805 |
| MQYSSEIPGSQAFLSKVQS | LNEAYSADLSSI   | GHLQTAHL         | P---RLA |     | 839 |

Human\_AHR-201\_ENSP00000242057.4.pro  
Neanderthal\_AHR\_this study.pro  
Human\_AHR\_Hubbard.pro  
Neanderthal\_AHR\_Hubbard.pro  
Mouse\_Ahr-202\_ENSMUSP00000112137.2.pro  
Rat\_Ahr-201\_ENSRNOP00000006618.5.pro

|                |  |     |
|----------------|--|-----|
| 840            |  |     |
| EARPFPDLTSSGFL |  | 848 |
|                |  | 805 |
| EAQPLPDLTPSGFL |  | 853 |
